# Supplementary material
Source: PubMed Central journal article supplement (PMC4862412)

Supplemental Information to Accompany

**Synthesis of a Stable and Orally Bioavailable Englerin Analogue**

David M. Fash, Cody J. Peer, Zhenwu Li, Ian J. Talisman, Sima Hayavi, Florian J. Sulzmaier,  
Joe W. Ramos, Carole Sourbier, Leonard Neckers, W. Douglas Figg, John A. Beutler,<sup>\*</sup> and  
William J. Chain<sup>\*</sup>

**Table of Contents**

|                                     |              |
|-------------------------------------|--------------|
| <b>General Information</b>          | <b>C–S2</b>  |
| <b>Materials</b>                    | <b>C–S2</b>  |
| <b>Instrumentation</b>              | <b>C–S2</b>  |
| <b>Experimental Procedures</b>      | <b>C–S3</b>  |
| <b>NMR Spectra</b>                  | <b>C–S26</b> |
| <b>Formulations</b>                 | <b>B–S1</b>  |
| <b>Oral Bioavailability Studies</b> | <b>B–S3</b>  |
| <b>NCI 60 Testing</b>               | <b>B–S5</b>  |

**General Information:** All reactions were performed in single-neck oven- or flame-dried round-bottom flasks fitted with rubber septa under a positive pressure of argon, unless otherwise noted. Air- and moisture-sensitive liquids were transferred via syringe or stainless steel cannula. Organic solutions were concentrated by rotary evaporation below 35 °C at 10 Torr (diaphragm vacuum pump) unless otherwise noted. Analytical thin-layer chromatography (TLC) was performed using glass plates pre-coated with silica gel (0.25 mm, 60-Å pore size, 230-400 mesh, Sorbent Technologies) impregnated with a fluorescent indicator (254 nm). TLC plates were visualized by exposure to ultraviolet light (UV), then were stained by submersion in aqueous acidic dinitrophenylhydrazine solution (DNP), Ceric Ammonium Molybdate (CAM), or aqueous basic potassium permanganate solution (KMnO<sub>4</sub>), followed by brief heating on a hot plate (215 °C, 10–30 s). Flash chromatography was performed as described by Still et al.<sup>1</sup>, employing silica gel (60-Å pore size, 40–63 µm, standard grade, Sorbent Technologies).

**Materials:** Commercial reagents and solvents were used as received with the following exceptions. Triethylamine, dichloromethane, ethyl ether, dimethylsulfoxide, tetrahydrofuran, hexane, toluene, and benzene were purified by the method of Pangborn, et. al.<sup>2</sup> 2-Chloropropanoate, 3-methyl-2-butanone, hexamethyldisilazane, and *N,N*-diisopropylamine were distilled from calcium hydride under an atmosphere of argon at 760 Torr. Hexamethylphosphoramide (HMPA) and *N,N*-dimethylformamide (DMF) were distilled from calcium hydride under reduced pressure (0.1 Torr) and stored under argon. 1,2-Diiodoethane was recrystallized from ethyl ether and stored under an atmosphere of argon. Lithium chloride was flame dried under vacuum (0.1 Torr, 10 min), cooled under an atmosphere of argon, and the dried solid was stored at 150 °C (drying oven, 760 Torr); the dried solid was also flame dried under vacuum (0.1 Torr, 10 min) immediately prior to use. The molarity of solutions of *n*-butyllithium was determined by titration against diphenylacetic acid as an indicator (average of three determinations).<sup>3</sup> Where noted, solvents were deoxygenated before use by bubbling with argon for 20 minutes.

**Instrumentation:** Proton nuclear magnetic resonance (<sup>1</sup>H NMR) spectra, carbon nuclear magnetic resonance (<sup>13</sup>C NMR), and fluorine nuclear magnetic resonance (<sup>19</sup>F NMR) spectra were recorded on Varian Mercury 300 MHz/75 MHz, Varian INOVA 500 MHz/125 MHz, Bruker CryoPlatform 400 MHz/100/376 MHz, or Bruker SMART 600 MHz/151 MHz NMR spectrometers

<sup>1</sup> Still, W. C.; Kahn, M.; Mitra, A. *J. Org. Chem.* **1978**, *43*, 2923–2925.

<sup>2</sup> Pangborn, A. B.; Giardello, M. A.; Grubbs, R. H.; Rosen, R. K.; Timmers, F. J. *Organometallics* **1996**, *15*, 1518–1520.

<sup>3</sup> Kofron, W. G.; Baclawski, L. M. *J. Org. Chem.* **1976**, *41*, 1879–1880.

at 23 °C. Proton chemical shifts are expressed in parts per million (ppm,  $\delta$  scale) downfield from tetramethylsilane and are referenced to residual protium in the NMR solvent ( $\text{CHCl}_3$ :  $\delta$  7.26,  $\text{CD}_2\text{HOD}$ :  $\delta$  3.31,  $\text{CD}_3\text{SOCD}_2\text{H}$ :  $\delta$  2.50). Carbon chemical shifts are expressed in parts per million (ppm,  $\delta$  scale) downfield from tetramethylsilane and are referenced to the carbon resonance of the NMR solvent ( $\text{CDCl}_3$ :  $\delta$  77.00,  $\text{CD}_3\text{OD}$ :  $\delta$  49.00,  $\text{CD}_3\text{SOCD}_3$ :  $\delta$  39.52). Data are represented as follows: chemical shift, multiplicity (s = singlet, d = doublet, t = triplet, q = quartet, m = multiplet, br = broad, app = apparent), integration, and coupling constant ( $J$ ) in Hertz (Hz). Infrared (IR) spectra were obtained using a Perkin Elmer 1600 FT-IR spectrophotometer referenced to a polystyrene standard and data are represented as frequency of absorption ( $\text{cm}^{-1}$ ). Optical rotations were determined using a JASCO-DIP-370 polarimeter equipped with a sodium lamp source (589 nm). Reported readings are the average of three determinations for each sample. High-resolution mass spectra were obtained using an Agilent 1100 quaternary LC system coupled to an Agilent 6210 LC/MSD-TOF fitted with an ESI or an APCI source, or Thermo Q-Exactive Orbitrap using electrospray ionization (ESI) or a Waters GCT Premier spectrometer using chemical ionization (CI).

## Experimental Procedures:

The following procedure for the preparation of the known 3-furanone **21**<sup>4</sup> was adapted from a literature report for the synthesis of 3-silyloxyfurans.<sup>5</sup>

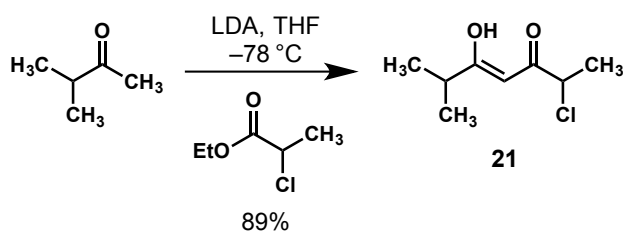

A solution of *n*-butyllithium (2.50 M, 14.4 mL, 36.0 mmol, 1.20 equiv) was added to a stirred solution of *N,N*-diisopropylamine (5.34 mL, 38.0 mmol, 1.26 equiv) in tetrahydrofuran (250 mL) at  $-78$  °C. The resultant solution was warmed briefly to  $0$  °C, then was cooled to  $-78$  °C whereupon a solution of 3-methyl-2-butanone (3.20 mL, 30.0 mmol) in tetrahydrofuran (15 mL) was added dropwise. The resultant mixture was stirred at  $-78$  °C for 30 min, whereupon ethyl 2-chloropropanoate (4.20 mL, 33.0 mmol, 1.10 equiv) was added. The resultant mixture was

<sup>4</sup> Mukerji, S. K.; Sharma, K. K.; Torrsell, K. B. G. *Tetrahedron* **1983**, 39, 2231–2235.

<sup>5</sup> Winkler, J. D.; Oh, K.; Asselin, S. M. *Org. Lett.* **2005**, 7, 387–389.

allowed to warm to 23 °C and stirred at that temperature for 8 h. The resultant yellow solution was cooled to 0 °C and was quenched with saturated aqueous ammonium chloride solution (30 mL). The layers were separated and the aqueous layer was extracted with dichloromethane (3 × 30 mL). The combined organic layers were dried over anhydrous sodium sulfate and the dried solution was concentrated. Purification of the residue by flash column chromatography (4% ethyl acetate-hexanes), afforded **21** (4.60 g, 89%) as a colorless oil.

Chlorodiketone **21**: TLC: 4% ethyl acetate–hexanes,  $R_f$  = 0.50 (UV,  $\text{KMnO}_4$ ).  $^1\text{H}$  NMR: (300 MHz,  $\text{CDCl}_3$ ),  $\delta$ : 5.84 (s, 1H), 4.38 (q,  $J$  = 6.9 Hz, 1H), 2.58–2.49 (m, 1H), 1.68 (d,  $J$  = 7.2 Hz, 3H), 1.18 (d,  $J$  = 7.0 Hz, 6H).  $^{13}\text{C}$  NMR: (75 MHz,  $\text{CDCl}_3$ ),  $\delta$ : 198.6, 192.1, 94.8, 56.6, 36.7, 21.9, 19.5. FTIR (NaCl, thin film),  $\text{cm}^{-1}$ : 2974, 1604. HRMS: ESI  $[\text{M} + \text{H}]^+$  Calcd. for  $\text{C}_8\text{H}_{14}\text{ClO}_2$ : 177.0677. Found: 177.0675.

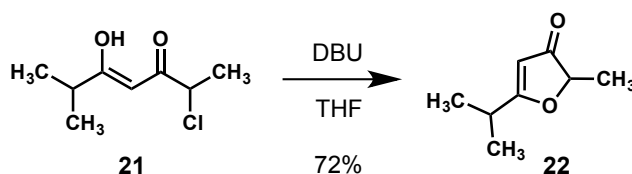

1,8-Diazabicyclo[5.4.0]undec-7-ene (6.00 mL, 40.0 mmol, 1.40 equiv) was added dropwise to a stirred solution of **21** (3.50 g, 28.5 mmol, 1 equiv) in tetrahydrofuran (100 mL) at 23 °C. A pale yellow precipitate formed immediately. The resultant suspension was stirred at 23 °C for 12 h, then was partitioned between water (100 mL) and ethyl acetate (100 mL). The layers were separated and the aqueous phase was extracted with ethyl acetate (6 × 50 mL). The combined organic layers were dried over anhydrous sodium sulfate and the dried solution was concentrated. Purification of the residue flash column chromatography (20% ethyl acetate–hexanes) gave **22** (2.80 g, 72%) as a pale yellow liquid.

3-furanone **22**: TLC: 20% ethyl acetate–hexanes,  $R_f$  = 0.35 (UV,  $\text{KMnO}_4$ ).  $^1\text{H}$  NMR (300 MHz,  $\text{CDCl}_3$ ),  $\delta$ : 5.38 (s, 1H), 4.49 (q,  $J$  = 6.9 Hz, 1H), 2.76–2.66 (m, 1H), 1.43 (d,  $J$  = 7.0 Hz, 3H), 1.24 (s, 3H), 1.22 (s, 3H).  $^{13}\text{C}$  NMR (75 MHz,  $\text{CDCl}_3$ ),  $\delta$ : 206.1, 198.7, 100.7, 82.6, 30.5, 19.7, 19.7, 16.6. FTIR (NaCl, thin film),  $\text{cm}^{-1}$ : 2975, 1742, 1707, 1586. HRMS: ESI  $[\text{M} + \text{H}]^+$  Calcd for  $\text{C}_8\text{H}_{13}\text{O}_2$ : 141.0910. Found: 141.0911.

The following literature procedure for the synthesis of **24** is provided for reader convenience:<sup>6</sup>

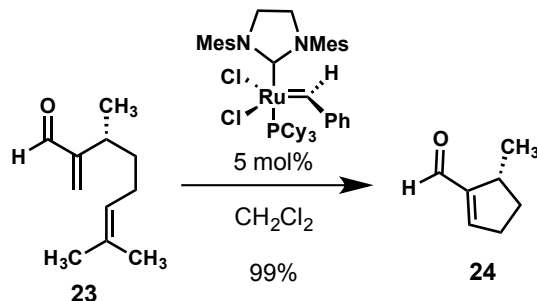

The second generation Grubbs catalyst (933 mg, 1.10 mmol, 0.05 equiv) was added in portions to a solution of **23**<sup>7</sup> (3.60 g, 22.0 mmol) in dichloromethane (200 mL) heated at reflux. The resultant brown solution was heated at reflux for 48 h, then was cooled and concentrated. Purification of the residue by flash column chromatography (4% ethyl acetate–hexanes) gave **24** (2.40 g, 99%) as a pale yellow oil.

Aldehyde **24**: TLC: 4% ethyl acetate–hexanes,  $R_f$  = 0.30 (UV,  $\text{KMnO}_4$ ).  $[\alpha]_D^{23} = -6.2^\circ$  ( $c$  = 0.58,  $\text{CH}_2\text{Cl}_2$ ).  $^1\text{H}$  NMR (300 MHz,  $\text{CDCl}_3$ ),  $\delta$ : 9.76 (s, 1H), 6.80 (m, 1H), 3.06–2.98 (m, 1H), 2.68–2.55 (m, 1H), 2.27–2.14 (m, 1H), 1.63–1.53 (m, 2H), 1.13 (d,  $J$  = 7.0 Hz, 3H).  $^{13}\text{C}$  NMR (75 MHz,  $\text{CDCl}_3$ ),  $\delta$ : 190.0, 153.2, 151.8, 36.8, 32.6, 32.1, 19.4. FTIR (NaCl, thin film),  $\text{cm}^{-1}$ : 2957, 1716, 1683, 1458. HRMS: ESI  $[\text{M} - \text{H}]^+$  Calcd for  $\text{C}_7\text{H}_9\text{O}$ : 111.0804. Found: 111.0810. Assay of enantiomeric excess: Chiral HPLC analysis (Regis (S, S)-Whelk-O #1 25 cm x 4.6 mm, 1 mL/min flow rate, 5% isopropanol–hexanes,  $t_R$  (major) = 7.30 min,  $t_R$  (minor) = 6.92 min) 79% ee, average of three determinations.

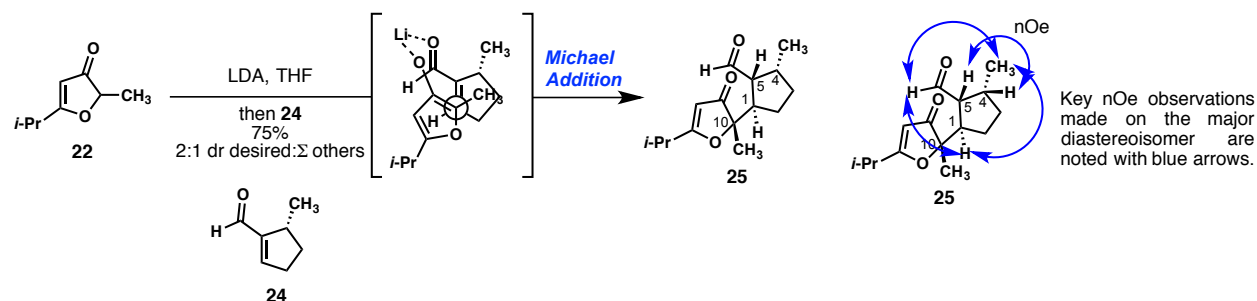

A solution of *n*-butyllithium (2.50 M, 2.20 mL, 5.50 mmol, 1.28 equiv) was added to a stirred solution of *N,N*-diisopropylamine (0.85 mL, 6.00 mmol, 1.40 equiv) in tetrahydrofuran (50 mL) at

<sup>6</sup> Chavez, D. E.; Jacobsen, E. N. *Org. Lett.* **2003**, 5 (14), 2563–2565.

<sup>7</sup> Takano, S.; Inomata, K.; Samizu, K.; Tomita, S.; Yanase, M.; Suzuki, M.; Iwabuchi, Y.; Sugihara, T.; Ogasawara, K. *Chem. Lett.* **1989**, 1283–1284.

–78 °C. The resultant solution was warmed briefly to 0 °C, then was cooled to –78 °C whereupon a solution of the 3-furanone **22** (600 mg, 4.30 mmol, 1 equiv) in tetrahydrofuran (5 mL) was added dropwise. The resultant mixture was stirred at –78 °C for 30 min, whereupon a solution of **24** (550 mg, 5.00 mmol, 1.16 equiv) in tetrahydrofuran (5 mL) was added. The reaction mixture was stirred at –78 °C for 30 min, then was warmed to 23 °C and stirred at that temperature for 1 h. The reaction mixture was then cooled to 0 °C whereupon saturated aqueous ammonium chloride solution (30 mL) was added carefully. The layers were separated and the aqueous layer was extracted with dichloromethane (3 × 30 mL). The combined organic layers were dried over anhydrous sodium sulfate and the dried solution was concentrated. Purification of the residue by flash column chromatography (20% ethyl acetate–hexanes) afforded the Michael adduct **25** (807 mg, 75%, 2:1 dr desired:Σ others) as a yellow oil.

Michael adduct **25**: TLC: 20% ethyl acetate–hexanes,  $R_f$  = 0.35 (UV, DNP).  $[\alpha]_D^{23}$  = +36.1° ( $c$  = 0.38,  $\text{CHCl}_3$ ). Major isomer:  $^1\text{H}$  NMR (300 MHz,  $\text{CDCl}_3$ ),  $\delta$ : 9.62 (d,  $J$  = 3.2 Hz, 1H), 5.32 (s, 1H), 2.90 (dd,  $J_1$  = 8.8 Hz,  $J_2$  = 15.6 Hz, 1H), 2.69–2.62 (m, 2H), 2.38–2.27 (m, 1H), 1.99–1.90 (m, 1H), 1.83–1.73 (m, 2H), 1.59–1.48 (m, 1H), 1.29 (s, 3H), 1.19 (d,  $J$  = 7.0 Hz, 6H), 0.98 (d,  $J$  = 7.0 Hz, 3H). Major isomer:  $^{13}\text{C}$  NMR: (75 MHz,  $\text{CDCl}_3$ ),  $\delta$ : 206.9, 204.4, 197.7, 101.2, 91.2, 54.5, 43.9, 39.0, 34.6, 30.5, 26.7, 21.0, 19.8, 19.5, 16.0. FTIR (NaCl, thin film),  $\text{cm}^{-1}$ : 2964, 1717, 1588. HRMS: ESI  $[\text{M} + \text{H}]^+$  Calcd for  $\text{C}_{15}\text{H}_{23}\text{O}_3$ : 251.1642. Found: 251.1649.

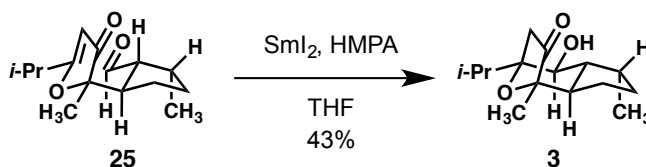

A solution of samarium(II) iodide in tetrahydrofuran [0.1 M, 8.64 mL, 864  $\mu\text{mol}$ , 4.00 equiv, freshly prepared from samarium powder (195 mg, 1.30 mmol, 6.00 equiv) and 1,2-diiodoethane (244 mg, 864  $\mu\text{mol}$ , 4.00 equiv)]<sup>8</sup> was added dropwise to a solution of the Michael adduct **25** (54.0 mg, 216  $\mu\text{mol}$ , 1 equiv) and HMPA (700  $\mu\text{L}$ , 4.00 mmol, 18.5 equiv) in deoxygenated tetrahydrofuran (10 mL). The resultant deep purple mixture was stirred at 23 °C for 3 h, then was cooled to 0 °C and quenched by the addition aqueous hydrochloric acid solution (1 N, 10 mL). The layers were separated and the aqueous layer was extracted with dichloromethane (3

<sup>8</sup> Reisman, S. E.; Ready, J. M.; Weiss, M. M.; Hasuoka, A.; Hirata, M.; Tamaki, K.; Ovaska, T. V.; Smith, C. J.; Wood, J. L., *J. Am. Chem. Soc.* **2008**, 130, 2087–2100.

× 10 mL). The combined organic layers were washed with saturated aqueous sodium bicarbonate solution (10 mL), dried over anhydrous sodium sulfate, and the dried solution was concentrated. Purification of the residue by flash column chromatography (10% ethyl acetate–hexanes) gave the ketoalcohol **3** (16.0 mg, 43%) as a pale yellow oil.

Ketoalcohol **3**: TLC: 20% ethyl acetate–hexanes,  $R_f$  = 0.30 (CAM).  $[\alpha]_D^{23}$  =  $-47.4^\circ$  ( $c$  = 1.0,  $\text{CHCl}_3$ ).  $^1\text{H}$  NMR (300 MHz,  $\text{CDCl}_3$ ),  $\delta$ : 3.90 (dd,  $J_1$  = 10.3 Hz,  $J_2$  = 4.3 Hz, 1H), 2.46 (d,  $J$  = 18.5 Hz, 1H), 2.31 (d,  $J$  = 18.5 Hz, 1H), 2.33–2.24 (m, 1H), 2.10 (sept,  $J$  = 7.0 Hz, 1H), 1.98–1.94 (m, 1H), 1.67–1.58 (m, 2H), 1.39 (d,  $J$  = 4.3 Hz, 1H), 1.22 (s, 3H), 1.18–1.12 (m, 2H), 1.09 (d,  $J$  = 7.0 Hz, 3H), 1.08 (d,  $J$  = 7.0 Hz, 3H), 0.901 (d,  $J$  = 7.0 Hz, 3H).  $^{13}\text{C}$  NMR (125 MHz,  $\text{CDCl}_3$ ),  $\delta$ : 215.7, 83.5, 82.8, 70.4, 49.3, 46.4, 41.5, 32.3, 31.0, 30.4, 24.2, 17.9, 17.5, 17.0, 16.7. FTIR (NaCl, thin film),  $\text{cm}^{-1}$ : 3470, 2958, 1749. HRMS: ESI  $[\text{M} + \text{H}]^+$  Calcd for  $\text{C}_{15}\text{H}_{25}\text{O}_3$ : 253.1798. Found: 253.1792.

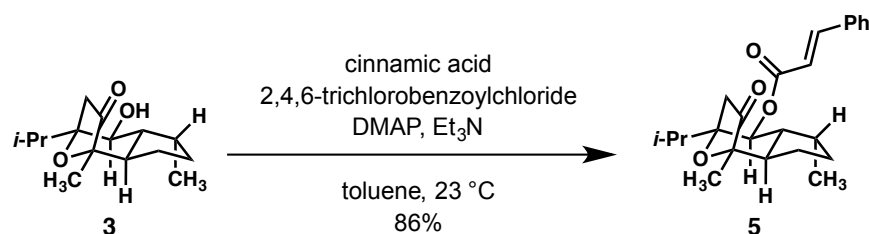

Cinnamic acid (18.0 mg, 120  $\mu\text{mol}$ , 2.00 equiv), triethylamine (25.0  $\mu\text{L}$ , 180  $\mu\text{mol}$ , 3.00 equiv), 2,4,6-trichlorobenzoyl chloride (25.0  $\mu\text{L}$ , 155  $\mu\text{mol}$ , 2.58 equiv) and 4-dimethylaminopyridine (1.0 mg, 8.2  $\mu\text{mol}$ , 0.14 equiv) were added sequentially to a solution of **3** (16.0 mg, 60.0  $\mu\text{mol}$ , 1 equiv) in toluene (2 mL). The resultant mixture was stirred at  $23^\circ\text{C}$  for 2 d, then was quenched with aqueous hydrochloric acid solution (1 N, 5 mL). The layers were separated and the aqueous layer was extracted with dichloromethane ( $3 \times 5$  mL). The combined organic layers were washed with saturated aqueous sodium bicarbonate (10 mL), then was dried over anhydrous sodium sulfate and the dried solution was concentrated. Purification of the residue by flash column chromatography (4% ethyl acetate–hexanes) afforded **5** (20.0 mg, 86%) as a colorless oil.

Ketoester **5**: TLC: 4% ethyl acetate–hexanes,  $R_f$  = 0.30 (UV, CAM).  $[\alpha]_D^{23}$  =  $-52.2^\circ$  ( $c$  = 0.32,  $\text{CHCl}_3$ ).  $^1\text{H}$  NMR (300 MHz,  $\text{CDCl}_3$ ),  $\delta$ : 7.67 (d,  $J$  = 16.1 Hz, 1H), 7.54–7.50 (m, 2H), 7.49–7.37 (m, 3H), 6.39 (d,  $J$  = 16.1 Hz, 1H), 5.37 (d,  $J$  = 10.6 Hz, 1H), 2.52 (ab, 1H), 2.14–2.06 (m, 1H), 2.01–1.92 (m, 1H), 1.91–1.75 (m, 2H), 1.68–1.47 (m, 2H), 1.256 (s, 3H), 1.23–1.18 (m, 2H), 1.03 (t,  $J$  = 7.4 Hz, 6H), 0.94 (d,  $J$  = 7.2 Hz, 3H).  $^{13}\text{C}$  NMR (75 MHz,  $\text{CDCl}_3$ ),  $\delta$ : 215.5, 165.7,

145.7, 134.4, 130.7, 129.2, 128.4, 117.9, 83.7, 82.6, 71.0, 48.6, 46.3, 42.9, 33.3, 31.3, 30.9, 23.5, 18.2, 17.7, 17.1, 17.0. FTIR (NaCl, thin film),  $\text{cm}^{-1}$ : 2960, 1754, 1713, 1636. HRMS: ESI  $[\text{M} + \text{H}]^+$  Calcd. for  $\text{C}_{24}\text{H}_{31}\text{O}_4$ : 383.2217. Found: 383.2213.

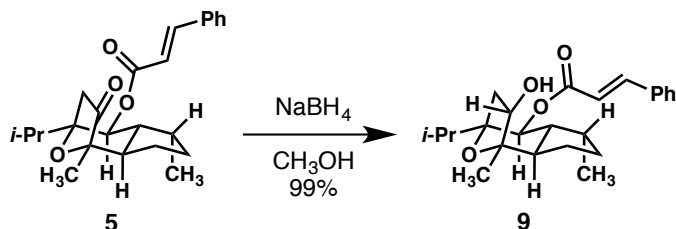

Sodium borohydride (2.50 mg, 65.0  $\mu\text{mol}$ , 1.00 equiv) was added to a solution of **5** (25 mg, 65  $\mu\text{mol}$ , 1 equiv) in methanol (2 mL) at 0 °C. The resultant mixture was stirred at 0 °C for 30 min, and excess borohydride was quenched by the addition of saturated aqueous ammonium chloride solution (5 mL). The resultant mixture was extracted with dichloromethane (3  $\times$  5 mL), the combined organic layers were dried over anhydrous sodium sulfate, and the dried solution was concentrated. Purification of the residue by flash column chromatography (20% ethyl acetate–hexanes) afforded **9** (25 mg, quantitative) as a colorless oil.

Ketoalcohol **9**: TLC: 20% ethyl acetate–hexanes,  $R_f$  = 0.40 (UV, CAM).  $[\alpha]_D^{23} = -32.6^\circ$  ( $c$  = 0.30,  $\text{CHCl}_3$ ).  $^1\text{H}$  NMR (300 MHz,  $\text{CDCl}_3$ ),  $\delta$ : 7.66 (d,  $J$  = 16.2 Hz, 1H), 7.54–7.50 (m, 2H), 7.39–7.36 (m, 3H), 6.40 (d,  $J$  = 16.2 Hz, 1H), 5.22 (d,  $J$  = 10.3 Hz, 1H), 4.19 (dd,  $J_1$  = 10.7 Hz,  $J_2$  = 4.8 Hz, 1H), 2.39–2.29 (m, 2H), 2.16–2.04 (m, 2H), 1.98–1.67 (m, 6H), 1.32 (s, 3H), 1.29–1.21 (m, 1H), 0.98–0.93 (m, 9H).  $^{13}\text{C}$  NMR (75 MHz,  $\text{CDCl}_3$ ),  $\delta$ : 166.1, 145.1, 134.6, 130.5, 129.1, 128.3, 118.6, 84.8, 81.6, 81.2, 72.7, 49.4, 46.4, 39.6, 33.1, 31.7, 31.4, 24.6, 23.5, 17.9, 17.3, 17.1. FTIR (NaCl, thin film),  $\text{cm}^{-1}$ : 2923, 1710, 1636. HRMS: ESI  $[\text{M} + \text{H}]^+$  Calcd. for  $\text{C}_{24}\text{H}_{33}\text{O}_4$ : 385.2373. Found: 385.2389.

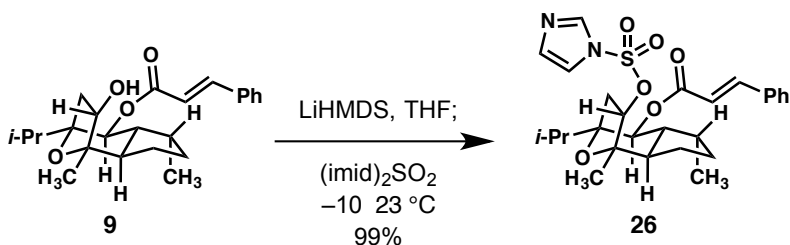

A solution of *n*-butyllithium (2.50 M, 72.8  $\mu\text{L}$ , 182  $\mu\text{mol}$ , 7.00 equiv) was added to a stirred solution of hexamethyldisilazane (42  $\mu\text{L}$ , 200  $\mu\text{mol}$ , 7.70 equiv) in tetrahydrofuran (2 mL) at 0 °C. The resultant solution was warmed briefly to 23 °C, then was cooled to 0 °C whereupon a

solution of **9** (10 mg, 26  $\mu$ mol, 1 equiv) in tetrahydrofuran (1 mL) was added. The resultant mixture was stirred at 0 °C for 30 min, then was cooled to –10 °C whereupon *N,N'*-sulfuryldiimidazole (40 mg, 200  $\mu$ mol, 7.70 equiv) was added. The reaction mixture was warmed to 23 °C, stirred at that temperature for 12 h. Excess *N,N'*-sulfuryldiimidazole was quenched by the addition of methanol (0.2 mL), and the resultant mixture was concentrated. The residue was partitioned between saturated aqueous sodium bicarbonate solution (5 mL) and dichloromethane (5 mL). The layers were separated and the aqueous phase was extracted with dichloromethane (3  $\times$  5 mL). The combined organic layers were dried over anhydrous sodium sulfate and the dried solution was concentrated. Purification of the residue by flash column chromatography (20% ethyl acetate-hexanes) gave **26** (13 mg, quantitative) as a colorless oil.

Imidazole **26**: TLC: 20% ethyl acetate–hexanes,  $R_f$  = 0.35 (UV, CAM).  $[\alpha]_D^{23}$  = –14.0° ( $c$  = 0.71,  $\text{CHCl}_3$ ).  $^1\text{H}$  NMR (300 MHz,  $\text{CDCl}_3$ ),  $\delta$ : 8.03 (s, 1H), 7.65 (d,  $J$  = 16.1 Hz, 1H), 7.56–7.53 (m, 2H), 7.41–7.38 (m, 4H), 7.24 (s, 1H), 6.38 (d,  $J$  = 16.4 Hz, 1H), 5.20 (d,  $J$  = 10.1 Hz, 1H), 4.59 (dd,  $J_1$  = 10.7 Hz,  $J_2$  = 4.8 Hz, 1H), 2.31–2.22 (m, 1H), 2.18–2.13 (m, 2H), 2.06–1.99 (m, 2H), 1.92–1.88 (m, 1H), 1.83–1.67 (m, 3H), 1.23–1.21 (m, 1H), 1.19 (s, 3H), 0.95–0.89 (m, 9H).  $^{13}\text{C}$  NMR (75 MHz,  $\text{CDCl}_3$ ),  $\delta$ : 165.8, 145.7, 137.4, 134.4, 131.8, 130.7, 129.2, 128.4, 118.2, 117.9, 90.7, 85.4, 81.3, 71.3, 49.0, 46.5, 35.9, 32.8, 31.4, 31.3, 24.1, 22.7, 17.7, 17.0, 17.0. FTIR (NaCl, thin film),  $\text{cm}^{-1}$ : 2960, 1713, 1636. HRMS: ESI  $[\text{M} + \text{H}]^+$  Calcd. for  $\text{C}_{27}\text{H}_{35}\text{N}_2\text{O}_6\text{S}$ : 515.2210. Found: 515.2215.

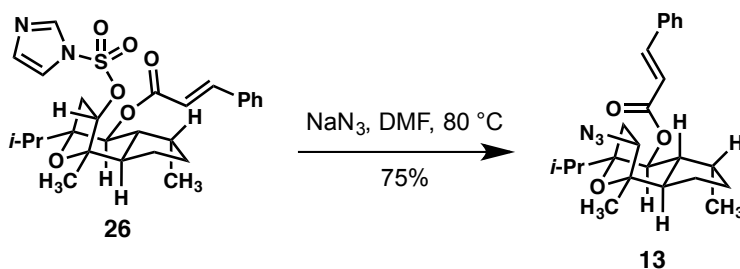

Sodium azide (25.0 mg, 380  $\mu$ mol, 20.0 equiv) was added in one portion to a stirred solution of **26** (10.0 mg, 19.0  $\mu$ mol, 1 equiv) in *N,N*-dimethylformamide (2 mL). The resultant mixture was heated at 80 °C for 2 d. The reaction mixture was cooled, diluted with dichloromethane (10 mL) and washed with water (10 mL). The aqueous layer was extracted with dichloromethane (3  $\times$  5 mL), the combined organic layers were dried over anhydrous sodium sulfate, and the dried solution was concentrated. Purification of the residue by flash column chromatography (2% ethyl acetate-hexanes) afforded **13** (6.0 mg, 75%) as a colorless oil.

**13**: TLC: 4% ethyl acetate–hexanes,  $R_f = 0.50$  (UV,  $\text{KMnO}_4$ ).  $[\alpha]_D^{23} = -37.7^\circ$  ( $c = 0.5$ ,  $\text{CHCl}_3$ ).  $^1\text{H}$  NMR: (500 MHz,  $\text{CDCl}_3$ ),  $\delta$ : 7.67 (d,  $J = 16.0$  Hz, 1H), 7.54–7.52 (m, 2H), 7.40–7.38 (m, 3H), 6.50 (d,  $J = 16.0$  Hz, 1H), 5.13 (d,  $J = 10.3$  Hz, 1H), 3.64 (dd,  $J = 8.4, 3.4$ , 1H), 2.60 (dd,  $J = 14.4, 8.5$  Hz, 1H), 2.15–2.10 (m, 1H), 1.95–1.89 (m, 3H), 1.81–1.70 (m, 2H), 1.50–1.44 (m, 1H), 1.33 (s, 3H), 1.30–1.24 (m, 2H), 1.03 (d,  $J = 6.8$  Hz, 3H), 0.98 (d,  $J = 7.0$  Hz, 3H), 0.94 (d,  $J = 7.0$  Hz, 3H).  $^{13}\text{C}$  NMR: (125 MHz,  $\text{CDCl}_3$ ),  $\delta$ : 165.6, 145.2, 134.2, 130.4, 128.9, 128.1, 117.9, 85.6, 85.4, 71.3, 63.3, 48.1, 46.9, 38.7, 32.9, 31.1, 30.9, 24.7, 20.2, 18.2, 17.5, 17.0. FTIR (NaCl, thin film),  $\text{cm}^{-1}$ : 2930, 2092, 1711, 1640. HRMS: ESI  $[\text{M} + \text{H}]^+$  Calcd. for  $\text{C}_{24}\text{H}_{32}\text{N}_3\text{O}_3$ : 410.2438. Found: 410.2443.

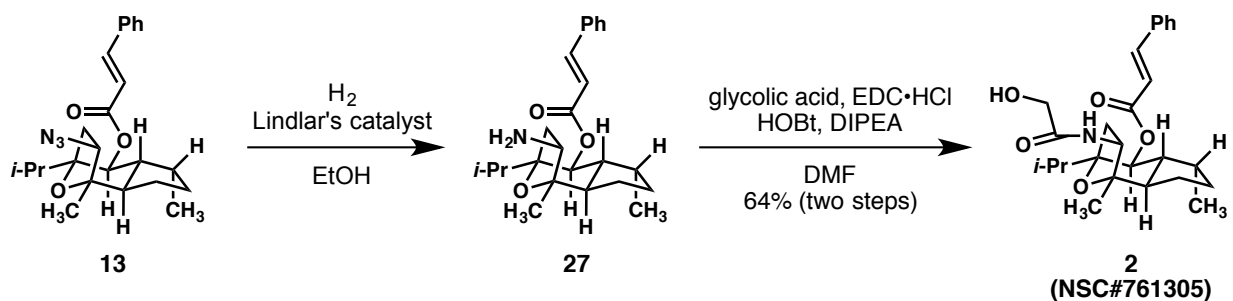

Lindlar's catalyst (5 mg) was added to a stirred solution of **13** (LZW-II-5-1, 9.0 mg, 22  $\mu\text{mol}$ , 1 equiv) in ethanol (2 mL). The resultant mixture was bubbled with hydrogen ( $\text{H}_2$ , balloon) for 5 minutes and then stirred under a hydrogen atmosphere at room temperature for 30 min. The reaction mixture was then filtered through a pad of Celite, and the filtrate was concentrated. Purification of the residue by flash column chromatography (2% triethylamine–ethyl acetate) afforded **27** as a colorless oil that was advanced without further characterization.

Glycolic acid (26.0 mg, 350  $\mu\text{mol}$ , 16.0 equiv), *N*-(3-Dimethylaminopropyl)-*N'*-ethylcarbodiimide hydrochloride (67.0 mg, 350  $\mu\text{mol}$ , 16.0 equiv) and 1-hydroxybenzotriazole (47.0 mg, 350  $\mu\text{mol}$ , 16.0 equiv) were added sequentially to a stirred solution of **27** in *N,N*-dimethylformamide (4 mL) at 23  $^\circ\text{C}$ . The reaction mixture was cooled to 0  $^\circ\text{C}$  whereupon *N,N*-diisopropylethylamine (152  $\mu\text{L}$ , 880  $\mu\text{mol}$ , 40 equiv) was added. The resultant mixture was stirred at 0  $^\circ\text{C}$  for 1 h, then allowed to warm to 23  $^\circ\text{C}$  and stirred for an additional 24 h. The reaction mixture was diluted with water (10 mL), and the aqueous layer was extracted with dichloromethane ( $3 \times 5$  mL). The combined organic layers were dried over anhydrous sodium sulfate and the dried solution was concentrated. Purification of the residue by flash column chromatography (67% ethyl acetate–hexanes) afforded **2** (6.0 mg, 64% two steps) as a colorless oil.

**2** (NCI – **NSC#761305**): TLC: 67% ethyl acetate–hexanes,  $R_f$  = 0.50 (UV, CAM).  $[\alpha]_D^{23}$  = –37.7° ( $c$  = 0.4, MeOH).  $^1\text{H}$  NMR: (500 MHz, MeOH- $d_4$ ),  $\delta$ : 7.69 (d,  $J$  = 15.9 Hz, 1H), 7.62–7.60 (m, 2H), 7.41–7.39 (m, 3H), 6.50 (d,  $J$  = 16.0 Hz, 1H), 5.13 (d,  $J$  = 9.6 Hz, 1H), 4.43 (dd,  $J_1$  = 9.1 Hz,  $J_2$  = 4.2 Hz, 1H), 4.00 (d,  $J$  = 4.3 Hz, 2H), 2.71 (dd,  $J_1$  = 14.1 Hz,  $J_2$  = 9.1 Hz, 1H), 2.15–2.11 (m, 1H), 2.04–1.96 (m, 1H), 1.92–1.87 (m, 1H), 1.80–1.76 (m, 2H), 1.72–1.66 (m, 3H), 1.41–1.36 (m, 1H), 1.30–1.27 (m, 2H), 1.14 (s, 3H), 1.04 (d,  $J$  = 6.8 Hz, 3H), 0.96 (d,  $J$  = 7.1 Hz, 3H), 0.93 (d,  $J$  = 7.2 Hz, 3H).  $^{13}\text{C}$  NMR: (125 MHz, MeOH- $d_4$ ),  $\delta$ : 174.1, 167.4, 146.8, 135.7, 131.7, 130.0, 129.3, 118.9, 86.4, 86.2, 72.7, 62.4, 52.0, 49.6, 47.9, 40.9, 34.7, 32.4, 32.0, 25.4, 20.1, 18.7, 17.8, 17.3. FTIR (NaCl, thin film),  $\text{cm}^{-1}$ : 3399, 2961, 1709, 1665, 1532. HRMS: ESI  $[\text{M} + \text{H}]^+$  Calcd. for  $\text{C}_{26}\text{H}_{36}\text{NO}_5$ : 442.2588. Found: 442.2567.

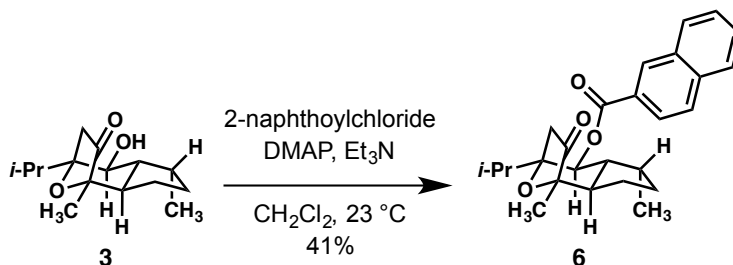

2-Naphthoyl chloride (59 mg, 0.31 mmol, 3.0 equiv) and 4-(dimethylamino)pyridine (38 mg, 0.31 mmol, 3.0 equiv) were added sequentially to a solution of **3** (26 mg, 0.10 mmol, 1.0 equiv) in 2:1 dichloromethane:triethylamine (30 mL). The reaction mixture was stirred at 23 °C for 2 d, then excess acid chloride was quenched by the addition of 1N aqueous hydrochloric acid solution (20 mL). The layers were separated and the aqueous layer was extracted with dichloromethane (3 × 20 mL). The combined organic extracts were washed with saturated aqueous sodium bicarbonate solution (20 mL), dried over anhydrous sodium sulfate, and the dried solution was concentrated. The resulting residue was purified by flash column chromatography (5% ethyl acetate–hexanes) to afford **6** as a pale yellow oil (17 mg, 41%).

Ketoester **6**: TLC: 20% ethyl acetate–hexanes,  $R_f$  = 0.68 (UV, CAM).  $^1\text{H}$  NMR (500 MHz,  $\text{CDCl}_3$ ),  $\delta$ : 8.55 (s, 1H), 8.00 (d,  $J$  = 8.5 Hz, 1H), 7.95 (d,  $J$  = 8.0 Hz, 1H), 7.89 (d,  $J$  = 9.0 Hz, 2H), 7.63–7.55 (m, 2H), 5.57 (d,  $J$  = 10.5 Hz, 2H), 2.65 (ab, 1H), 2.15–2.11 (m, 1H), 2.05–1.99 (m, 1H), 1.93–1.85 (m, 2H), 1.73–1.67 (m, 2H), 1.30 (s, 3H), 1.27–1.22 (m, 2H), 1.07 (d,  $J$  = 7.0 Hz, 3H), 1.03 (d,  $J$  = 7.0 Hz, 3H), 0.99 (d,  $J$  = 7.0 Hz, 3H).  $^{13}\text{C}$  NMR (125 MHz,  $\text{CDCl}_3$ ),  $\delta$ : 215.3, 165.2, 135.6, 132.4, 131.2, 129.3, 128.5, 128.3, 127.8, 127.0, 126.8, 125.1, 83.6, 82.5, 71.3, 48.4, 46.2, 42.9, 33.1, 31.1, 30.7, 29.7, 23.3, 17.9, 17.6, 16.9. FTIR (NaCl, thin film),  $\text{cm}^{-1}$ :

2925, 1715, 1631, 1276, 1196, 778. HRMS: APCI  $[M + H]^+$  Calcd. for  $C_{26}H_{32}O_4$ : 407.2222. Found: 407.2226.

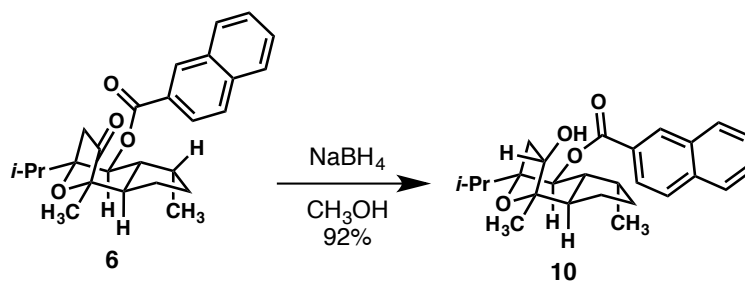

Sodium borohydride (15 mg, 0.40 mmol, 3.0 equiv) was added to a solution of **6** (54 mg, 0.13 mmol, 1.0 equiv) in methanol (25 mL) at 0 °C. The resultant mixture was stirred at 0 °C for 1 h, and then the excess borohydride was quenched by the addition of saturated aqueous ammonium chloride solution (25 mL). The mixture was extracted with dichloromethane (3 × 20 mL), the combined organic layers were dried over anhydrous sodium sulfate, and the dried solution was concentrated. Purification of the residue by flash column chromatography (20% ethyl acetate–hexanes) afforded **10** (50 mg, 92%) as a colorless oil.

Hydroxy ester **10**: TLC: 20% ethyl acetate–hexanes,  $R_f$  = 0.36 (UV, CAM).  $^1\text{H}$  NMR (500 MHz,  $\text{CDCl}_3$ ),  $\delta$ : 8.58 (s, 1H), 8.05 (d,  $J$  = 9.0 Hz, 1H), 7.95 (d,  $J$  = 8.0 Hz, 1H), 7.88 (d,  $J$  = 8.5 Hz, 2H), 7.61–7.53 (m, 2H), 5.42 (d,  $J$  = 10.5 Hz, 2H), 4.25 (dd,  $J_1$  = 11.0 Hz,  $J_2$  = 5.0 Hz, 1H), 2.54–2.48 (m, 1H), 2.43 (dd,  $J_1$  = 13.5 Hz,  $J_2$  = 11.0 Hz, 1H), 2.25 (dd,  $J_1$  = 13.5 Hz,  $J_2$  = 5.0 Hz, 1H), 2.19–2.15 (m, 2H), 2.05–1.83 (m, 6H), 1.36 (s, 3H), 1.32–1.20 (m, 2H), 1.00 (d,  $J$  = 7.0 Hz, 3H), 0.98 (d,  $J$  = 7.0 Hz, 3H), 0.95 (d,  $J$  = 7.0 Hz, 3H).  $^{13}\text{C}$  NMR (125 MHz,  $\text{CDCl}_3$ ),  $\delta$ : 165.4, 135.5, 132.5, 131.1, 129.3, 128.2, 128.1, 127.7, 127.6, 126.6, 125.3, 84.7, 81.5, 81.1, 73.0, 49.2, 46.3, 39.5, 33.0, 31.5, 31.1, 29.7, 24.4, 23.3, 17.8, 17.0. FTIR (NaCl, thin film),  $\text{cm}^{-1}$ : 2924, 1714, 1631, 1276, 1196, 778. HRMS: APCI  $[M + H]^+$  Calcd. for  $C_{26}H_{34}O_4$ : 409.2379. Found: 409.2364.

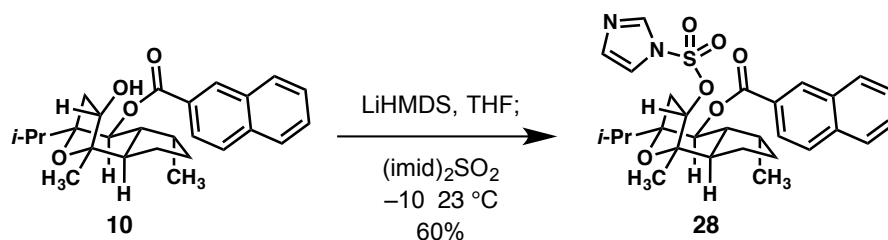

A solution of *n*-butyllithium (2.50 M in hexanes, 340  $\mu\text{L}$ , 0.86 mmol, 7.00 equiv) was added to a stirred solution of hexamethyldisilazane (230  $\mu\text{L}$ , 0.94 mmol, 7.70 equiv) in tetrahydrofuran (15 mL) at 0  $^\circ\text{C}$ . The resultant solution was warmed briefly to 23  $^\circ\text{C}$ , then was cooled to 0  $^\circ\text{C}$  whereupon a solution of **10** (50 mg, 0.12 mmol, 1 equiv) in tetrahydrofuran (5 mL) was added. The resultant mixture was stirred at 0  $^\circ\text{C}$  for 30 min, then was cooled to  $-10 \text{ } ^\circ\text{C}$  whereupon *N,N'*-sulfuryldiimidazole (218 mg, 1.10 mmol, 9.00 equiv) was added. The reaction mixture was warmed to 23  $^\circ\text{C}$  and stirred at that temperature for 12 h. Excess *N,N'*-sulfuryldiimidazole was quenched by the addition of methanol (5 mL), and the resultant mixture was concentrated. The residue was partitioned between saturated aqueous sodium bicarbonate solution (20 mL) and dichloromethane (20 mL). The layers were separated and the aqueous phase was extracted with dichloromethane (3  $\times$  25 mL). The combined organic layers were dried over anhydrous sodium sulfate and the dried solution was concentrated. Purification of the residue by flash column chromatography (20% ethyl acetate-hexanes) gave **28** (39 mg, 60%) as a colorless oil.

Imidazole **28**: TLC: 20% ethyl acetate–hexanes,  $R_f$  = 0.33 (UV, CAM).  $^1\text{H}$  NMR (500 MHz,  $\text{CDCl}_3$ ),  $\delta$ : 8.53 (s, 1H), 8.07 (s, 1H), 8.02 (d,  $J$  = 8.0 Hz, 1H), 7.98 (d,  $J$  = 8.5 Hz, 1H), 7.90 (d,  $J$  = 8.5 Hz, 2H), 7.63–7.58 (m, 2H), 7.42 (s, 1H), 7.28 (s, 1H), 5.38 (d,  $J$  = 9.5 Hz, 2H), 4.64 (dd,  $J_1$  = 11.0 Hz,  $J_2$  = 5.0 Hz, 1H), 2.37 (dd,  $J_1$  = 14.5 Hz,  $J_2$  = 11.0 Hz, 1H), 2.27–2.22 (m, 1H), 2.19–2.14 (m, 2H), 2.02–1.90 (m, 2H), 1.83–1.77 (m, 1H), 1.74–1.60 (m, 2H), 1.28–1.24 (m, 1H), 1.22 (s, 3H), 0.98 (d,  $J$  = 7.0 Hz, 3H), 0.94 (d,  $J$  = 7.0 Hz, 3H), 0.92 (d,  $J$  = 7.0 Hz, 3H).  $^{13}\text{C}$  NMR (125 MHz,  $\text{CDCl}_3$ ),  $\delta$ : 165.2, 135.6, 132.5, 131.2, 129.4, 128.5, 128.3, 127.8, 127.0, 126.8, 125.2, 90.5, 85.0, 81.2, 71.6, 48.9, 46.4, 35.7, 32.7, 31.2, 31.1, 29.7, 23.9, 22.5, 17.5, 16.8. FTIR (NaCl, thin film),  $\text{cm}^{-1}$ : 2920, 1715, 1632, 1198, 778. HRMS: ESI  $[\text{M} + \text{Na}]^+$  Calcd. for  $\text{C}_{29}\text{H}_{34}\text{N}_2\text{NaO}_6\text{S}$ : 561.2035. Found: 561.2025.

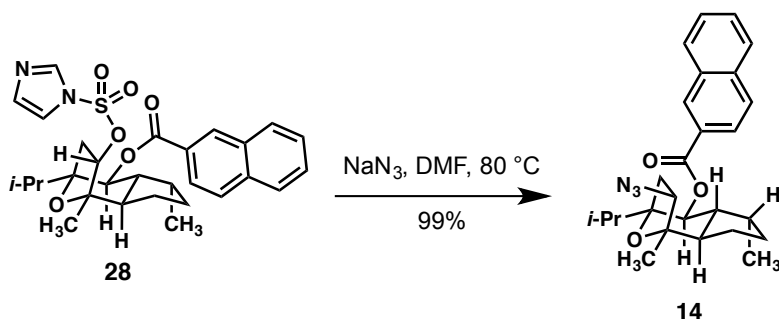

Sodium azide (94.0 mg, 1.44 mmol, 20.0 equiv) was added to a solution of **28** (39.0 mg, 72.4  $\mu\text{mol}$ , 1.0 equiv) in *N,N*-dimethylformamide (5 mL). The reaction mixture was heated at 80  $^\circ\text{C}$  for 18 h, and then quenched by the addition of 10% aqueous lithium chloride solution (20 mL). The mixture was extracted with dichloromethane (3  $\times$  25 mL), the combined organic layers were dried over anhydrous sodium sulfate, and the dried solution was concentrated. Purification of the residue by flash column chromatography (5% ethyl acetate–hexanes) afforded the azide **14** (31 mg, 99%) as a colorless oil.

Azide **14**: TLC: 20% ethyl acetate–hexanes,  $R_f$  = 0.66 (UV, CAM).  $^1\text{H}$  NMR (500 MHz,  $\text{CDCl}_3$ ),  $\delta$ : 8.56 (s, 1H), 8.02 (d,  $J$  = 8.5 Hz, 1H), 7.96 (d,  $J$  = 8.0 Hz, 1H), 7.89 (d,  $J$  = 8.5 Hz, 2H), 7.63–7.55 (m, 2H), 5.32 (d,  $J$  = 10.0 Hz, 2H), 3.72 (dd,  $J_1$  = 8.5 Hz,  $J_2$  = 3.5 Hz, 1H), 2.77 (dd,  $J_1$  = 14.0 Hz,  $J_2$  = 8.5 Hz, 1H), 2.17–2.13 (m, 1H), 2.05–2.02 (m, 1H), 1.99–1.92 (m, 2H), 1.88–1.75 (m, 3H), 1.63–1.60 (m, 2H), 1.37 (s, 3H), 1.05 (d,  $J$  = 7.0 Hz, 3H), 1.00 (d,  $J$  = 7.0 Hz, 3H), 0.90 (d,  $J$  = 7.0 Hz, 3H).  $^{13}\text{C}$  NMR (125 MHz,  $\text{CDCl}_3$ ),  $\delta$ : 165.2, 135.6, 132.5, 131.1, 129.3, 128.3, 128.2, 127.8, 127.3, 126.8, 125.2, 85.7, 85.5, 71.9, 63.4, 48.2, 47.0, 38.9, 33.0, 31.1, 30.9, 29.7, 24.8, 20.2, 18.3, 17.5, 17.0. FTIR (NaCl, thin film),  $\text{cm}^{-1}$ : 2957, 2927, 2094, 1720, 1276, 1195. HRMS: APCI  $[\text{M} + \text{H}]^+$  Calcd. for  $\text{C}_{26}\text{H}_{32}\text{N}_3\text{O}_3$ : 434.2444. Found: 434.2459.

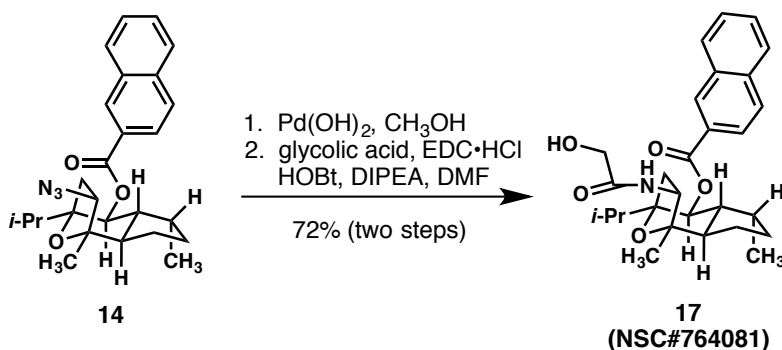

Palladium hydroxide on carbon (Pearlman's catalyst, 1.4 mg, 20 wt. % loading) was added to a solution of **14** (7.0 mg, 16  $\mu$ mol, 1.0 equiv) in methanol (5 mL). The reaction mixture was bubbled with hydrogen ( $H_2$ , balloon) for 10 min, then was stirred under a hydrogen atmosphere (balloon) for 5 h. The reaction flask was purged with argon, the reaction mixture was filtered through a pad of Celite, and the pad was washed with methanol. The combined organic filtrates were concentrated and the resultant oily residue was dissolved in *N,N*-dimethylformamide (10 mL). Glycolic acid (12.0 mg, 0.161 mmol, 10.0 equiv), *N*-(3-Dimethylaminopropyl)-*N'*-ethylcarbodiimide hydrochloride (31.0 mg, 0.161 mmol, 10.0 equiv), and 1-hydroxybenzotriazole (22.0 mg, 0.161 mmol, 10.0 equiv) were added sequentially to the stirred solution at 23  $^{\circ}$ C. The reaction mixture was cooled to 0  $^{\circ}$ C whereupon *N,N*-diisopropylethylamine (84  $\mu$ L, 0.48 mmol, 30 equiv) was added. The resultant mixture was stirred at 0  $^{\circ}$ C for 1 h, then allowed to warm to 23  $^{\circ}$ C and stirred for an additional 18 h. The reaction mixture was quenched with 10% aqueous lithium chloride solution (20 mL), then extracted with dichloromethane (3  $\times$  25 mL). The combined organic layers were dried over anhydrous sodium sulfate and the dried solution was concentrated. Purification of the residue by flash column chromatography (50% ethyl acetate–hexanes) afforded the glycolamide **17** (5.4 mg, 72% over two steps) as a colorless oil.

Glycolamide **17**: TLC: 50% ethyl acetate–hexanes,  $R_f$  = 0.20 (UV, CAM).  $^1H$  NMR (500 MHz,  $CD_3OD$ ),  $\delta$ : 8.56 (s, 1H), 8.02 (d,  $J$  = 8.7 Hz, 1H), 7.96 (d,  $J$  = 7.5 Hz, 1H), 7.88 (d,  $J$  = 8.4 Hz, 2H), 7.63–7.53 (m, 2H), 6.52 (d,  $J$  = 9.6 Hz, 2H), 4.58–4.50 (m, 1H), 4.17 (s, 3H), 3.51 (bs, 1H), 2.90 (dd,  $J_1$  = 14.4 Hz,  $J_2$  = 9.0 Hz, 1H), 2.33–2.28 (m, 1H), 2.20–2.13 (m, 1H), 1.99–1.65 (m, 7H), 1.38–1.31 (m, 2H), 1.22 (s, 3H), 1.04 (d,  $J$  = 6.6 Hz, 3H), 0.98 (d,  $J$  = 6.9 Hz, 3H), 0.97 (d,  $J$  = 6.9 Hz, 3H).  $^{13}C$  NMR (125 MHz,  $CD_3OD$ ),  $\delta$ : 174.1, 166.9, 137.1, 134.0, 132.2, 130.4, 129.7, 129.5, 128.9, 128.6, 128.0, 126.1, 86.5, 86.3, 73.3, 62.4, 52.2, 49.7, 48.0, 41.2, 34.9, 32.5, 32.1, 25.5, 20.1, 18.8, 17.8, 17.3. FTIR (NaCl, thin film),  $cm^{-1}$ : 2954, 2926, 1714, 1659, 1276, 1196, 1096, 968. HRMS: APCI  $[M + H]^+$  Calcd. for  $C_{28}H_{36}NO_5$ : 466.2588. Found: 466.2607.

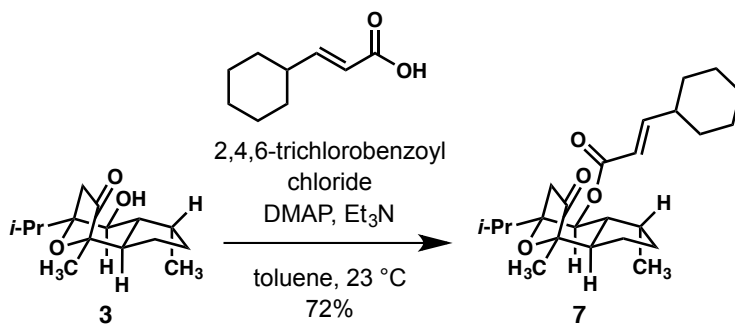

(*E*)-3-cyclohexylacrylic acid (45 mg, 0.29 mmol, 2.0 equiv), triethylamine (61  $\mu$ L, 0.44 mmol, 3.0 equiv), 2,4,6-trichlorobenzoyl chloride (57  $\mu$ L, 0.37 mmol, 2.5 equiv), and 4-(dimethylamino)pyridine (3.6 mg, 29  $\mu$ mol, 0.2 equiv) were added sequentially to a solution of **3** (37 mg, 0.15 mmol, 1.0 equiv) in toluene (30 mL). The reaction mixture was stirred at 23 °C for 2 d, then excess acid chloride was quenched with 1N aqueous hydrochloric acid solution (20 mL). The layers were separated and the aqueous layer was extracted with dichloromethane (3  $\times$  20 mL). The combined organic extracts were washed with saturated aqueous sodium bicarbonate solution (20 mL), dried over anhydrous sodium sulfate, and the dried solution was concentrated. The resulting residue was purified by flash column chromatography (5% ethyl acetate–hexanes) gave **7** as a pale yellow oil (41 mg, 72%).

Ketoester **7**: TLC: 20% ethyl acetate–hexanes,  $R_f$  = 0.69 (CAM).  $^1\text{H}$  NMR (500 MHz,  $\text{CDCl}_3$ ),  $\delta$ : 6.90 (dd,  $J_1$  = 15.5 Hz,  $J_2$  = 7.0 Hz, 1H), 5.70 (d,  $J$  = 15.5 Hz, 1H), 5.29 (d,  $J$  = 10.5 Hz, 1H), 2.47 (ab, 1H), 2.14–2.06 (m, 2H), 1.95–1.86 (m, 2H), 1.78–1.75 (m, 4H), 1.69–1.64 (m, 2H), 1.52–1.49 (m, 1H), 1.43 (s, 3H), 1.33–1.28 (m, 2H), 1.21–1.12 (m, 4H), 1.02 (d,  $J$  = 7.0 Hz, 3H), 0.99 (d,  $J$  = 7.0 Hz, 3H), 0.92 (d,  $J$  = 7.0 Hz, 3H).  $^{13}\text{C}$  NMR (125 MHz,  $\text{CDCl}_3$ ),  $\delta$ : 215.4, 165.6, 155.4, 118.4, 83.5, 82.4, 70.3, 48.3, 46.0, 42.7, 40.5, 33.0, 31.6, 31.0, 30.7, 30.3, 29.7, 25.9, 25.7, 23.2, 17.9, 17.5, 16.9, 16.8. FTIR (NaCl, thin film),  $\text{cm}^{-1}$ : 2927, 2853, 1722, 1651. HRMS: APCI  $[\text{M} + \text{H}]^+$  Calcd. for  $\text{C}_{24}\text{H}_{37}\text{O}_4$ : 389.2692. Found: 389.2661.

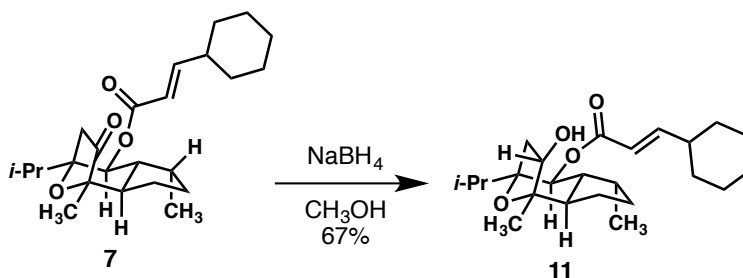

Sodium borohydride (30 mg, 0.78 mmol, 4.0 equiv) was added to a solution of **7** (76 mg, 0.20 mmol, 1.0 equiv) in methanol (40 mL) at 0 °C. The resultant mixture was stirred at 0 °C for 30 min, and then the excess sodium borohydride was quenched by the addition of saturated aqueous ammonium chloride solution (25 mL). The mixture was extracted with dichloromethane (3  $\times$  20 mL), the combined organic layers were dried over anhydrous sodium sulfate, and the dried solution was concentrated. Purification of the residue by flash column chromatography (20% ethyl acetate–hexanes) afforded **11** (41 mg, 67%) as a colorless oil.

Hydroxyester **11**: TLC: 20% ethyl acetate–hexanes,  $R_f$  = 0.30 (CAM);  $^1\text{H}$  NMR (600 MHz,  $\text{CDCl}_3$ ),  $\delta$ : 6.89 (dd,  $J_1$  = 16.0,  $J_2$  = 6.5 Hz, 1H), 5.71 (d,  $J$  = 16.0 Hz, 1H), 5.12 (d,  $J$  = 10.5 Hz, 1H), 4.17 – 4.12 (m, 1H), 2.30 – 2.25 (m, 2H), 2.13 – 2.08 (m, 2H), 2.04 – 1.99 (m, 1H), 1.79 – 1.71 (m, 6H), 1.69 – 1.64 (m, 2H), 1.29 (s, 3H), 1.26 – 1.24 (m, 4H), 1.16 – 1.09 (m, 5H), 0.94 (d,  $J$  = 6.5 Hz, 3H), 0.91 (d,  $J$  = 7.0 Hz, 3H), 0.90 (d,  $J$  = 7.0 Hz, 3H).  $^{13}\text{C}$  NMR (151 MHz,  $\text{CDCl}_3$ ),  $\delta$ : 166.1, 154.7, 119.1, 84.7, 72.2, 54.5, 49.2, 46.3, 40.5, 39.5, 33.0, 32.3, 31.8, 31.8, 31.6, 31.3, 26.1, 25.9, 24.4, 23.4, 17.8, 17.1, 17.0. FTIR (NaCl, thin film),  $\text{cm}^{-1}$ : 3310, 2925, 2853, 1549, 1375. HRMS: APCI  $[\text{M} + \text{H}]^+$  Calcd. for  $\text{C}_{24}\text{H}_{39}\text{O}_4$ : 391.2848. Found: 391.2845.

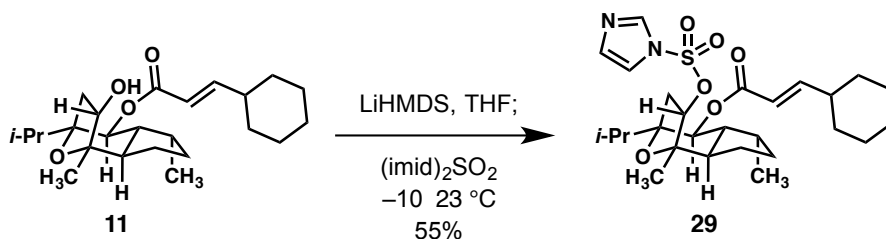

A solution of *n*-butyllithium (2.50 M in hexanes, 0.33 mL, 0.82 mmol, 7.00 equiv) was added to a stirred solution of hexamethyldisilazane (0.19 mL, 0.91 mmol, 7.7 equiv) in tetrahydrofuran (10 mL) at  $0$  °C. The resultant solution was warmed briefly to  $23$  °C, then was cooled to  $0$  °C whereupon a solution of **11** (46 mg, 0.12 mmol, 1.0 equiv) in tetrahydrofuran (5 mL) was added. The resultant mixture was stirred at  $0$  °C for 30 min, then was cooled to  $-10$  °C whereupon *N,N'*-sulfuryldiimidazole (210 mg, 1.06 mmol, 9.00 equiv) was added. The reaction mixture was warmed to  $23$  °C and stirred at that temperature for 12 h. Excess *N,N'*-sulfuryldiimidazole was quenched by the addition of methanol (5 mL), and the resultant mixture was concentrated. The residue was partitioned between saturated aqueous bicarbonate solution (20 mL) and dichloromethane (20 mL). The layers were separated and the aqueous phase was extracted with dichloromethane ( $3 \times 25$  mL). The combined organic layers were dried over anhydrous sodium sulfate and the dried solution was concentrated. Purification of the residue by flash column chromatography (20% ethyl acetate–hexanes) gave **29** (34 mg, 55%) as a colorless oil.

Imidazole **29**: TLC: 20% ethyl acetate–hexanes,  $R_f$  = 0.32 (UV, CAM).  $^1\text{H}$  NMR (500 MHz,  $\text{CDCl}_3$ ),  $\delta$ : 8.02 (s, 1H), 7.37 (s, 1H), 7.23 (s, 1H), 6.89 (dd,  $J_1$  = 16.0 Hz,  $J_2$  = 6.5 Hz, 1H), 5.79 (d,  $J$  = 16.0 Hz, 1H), 5.11 (d,  $J$  = 10.0 Hz, 1H), 4.56 (dd,  $J_1$  = 11.0 Hz,  $J_2$  = 5.0 Hz, 1H), 2.27–2.20 (m, 1H), 2.15–2.05 (m, 4H), 2.01–1.95 (m, 2H), 1.87–1.83 (m, 1H), 1.78–1.75 (m, 6H), 1.68–1.65 (m, 3H), 1.60–1.54 (m, 3H), 1.17 (s, 3H), 0.91–0.87 (m, 12H).  $^{13}\text{C}$  NMR (125 MHz,  $\text{CDCl}_3$ ),  $\delta$ : 165.6, 155.3, 131.6, 118.4, 90.5, 85.2, 81.0, 70.6, 48.7, 46.2, 40.5, 35.6, 32.5, 31.9,

31.6, 31.1, 30.3, 29.7, 25.9, 25.7, 23.9, 22.4, 17.4, 16.7. FTIR (NaCl, thin film),  $\text{cm}^{-1}$ : 2924, 2852, 1720, 1648, 1423. HRMS: ESI  $[\text{M} + \text{Na}]^+$  Calcd. for  $\text{C}_{27}\text{H}_{40}\text{N}_2\text{NaO}_6\text{S}$ : 543.2505. Found: 543.2476.

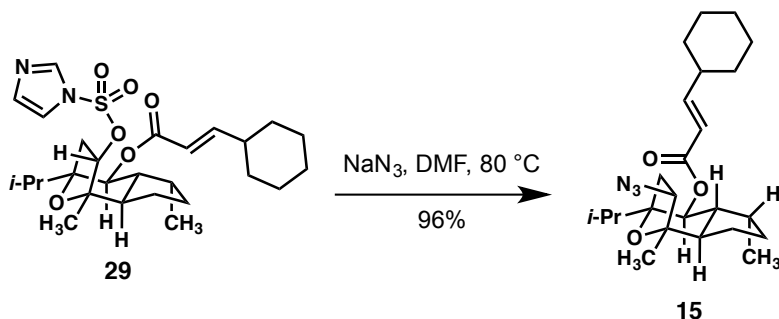

Sodium azide (85 mg, 1.3 mmol, 20 equiv) was added in one portion to a solution of **29** (34 mg, 65  $\mu\text{mol}$ , 1.0 equiv) in *N,N*-dimethylformamide (5 mL). The reaction mixture was heated at 80  $^\circ\text{C}$  for 18 h, and then quenched with 10% aqueous lithium chloride solution (20 mL). The mixture was extracted with dichloromethane (3  $\times$  20 mL), the combined organic layers were dried over anhydrous sodium sulfate, and the dried solution was concentrated. Purification of the residue by flash column chromatography (5% ethyl acetate–hexanes) afforded the azide **15** (26 mg, 96%) as a colorless oil.

Azide **15**: TLC: 20% ethyl acetate–hexanes,  $R_f$  = 0.74 (CAM).  $^1\text{H}$  NMR (500 MHz,  $\text{CDCl}_3$ ),  $\delta$ : 6.89 (dd,  $J_1$  = 16.0 Hz,  $J_2$  = 6.5 Hz, 1H), 5.71 (d,  $J$  = 15.5 Hz, 1H), 5.04 (d,  $J$  = 10.5 Hz, 1H), 3.60 (dd,  $J_1$  = 8.0 Hz,  $J_2$  = 3.0 Hz, 1H), 2.53 (dd,  $J_1$  = 14.5 Hz,  $J_2$  = 8.5 Hz, 1H), 2.14–2.09 (m, 3H), 1.91–1.84 (m, 4H), 1.79–1.72 (m, 6H), 1.70–1.66 (m, 2H), 1.60–1.54 (m, 3H), 1.43–1.40 (m, 1H), 1.31 (s, 3H), 1.00 (d,  $J$  = 7.0 Hz, 3H), 0.94 (d,  $J$  = 7.0 Hz, 3H), 0.91 (d,  $J$  = 7.0 Hz, 3H).  $^{13}\text{C}$  NMR (125 MHz,  $\text{CDCl}_3$ ),  $\delta$ : 165.7, 155.0, 118.6, 85.6, 85.4, 70.9, 63.3, 48.0, 46.9, 40.4, 38.6, 32.8, 31.7, 31.1, 30.9, 25.9, 25.7, 24.7, 20.2, 18.2, 17.5, 16.9. FTIR (NaCl, thin film),  $\text{cm}^{-1}$ : 2928, 2853, 2094, 1722, 1713. HRMS APCI  $[\text{M} + \text{H}]^+$  Calcd. for  $\text{C}_{24}\text{H}_{38}\text{N}_3\text{O}_3$ : 416.2908. Found: 416.2912.

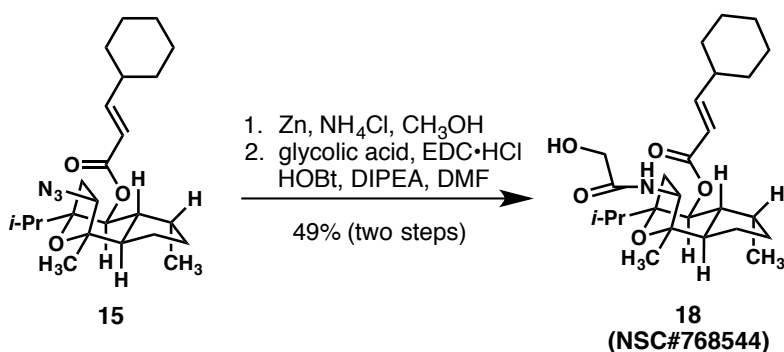

Ammonium chloride (5.0 mg, 96  $\mu\text{mol}$ , 10 equiv) and zinc (dust, 6.0 mg, 96  $\mu\text{mol}$ , 10 equiv) were added sequentially to a solution of **15** (4.0 mg, 9.6  $\mu\text{mol}$ , 1.0 equiv) in methanol (3 mL). The reaction mixture was stirred vigorously at room temperature for 2 h, then was concentrated. The resulting residue was triturated with diethyl ether ( $3 \times 10$  mL) and the combined organic fractions were filtered through a pad of silica gel to afford the amine (3.5 mg, 93%), which was advanced without further purification. Glycolic acid (8.0 mg, 0.10 mmol, 10 equiv), *N*-(3-dimethylaminopropyl)-*N'*-ethylcarbodiimide hydrochloride (20.0 mg, 0.103 mmol, 10.0 equiv), and 1-hydroxybenzotriazole (14 mg, 0.10 mmol, 10 equiv) were added sequentially to a stirred solution of the amine intermediate in *N,N*-dimethylformamide (10 mL) at 23 °C. The reaction mixture was cooled to 0 °C whereupon *N,N*-diisopropylamine (54  $\mu\text{L}$ , 0.31 mmol, 30.0 equiv) was added. The reaction mixture was stirred at 0 °C for 1 h, then allowed to warm to 23 °C and stirred for an additional 18 h. The reaction mixture was quenched with 10% aqueous lithium chloride solution (20 mL), then was extracted with dichloromethane ( $3 \times 25$  mL). The combined organic layers were dried over anhydrous sodium sulfate and the dried solution was concentrated. Purification of the residue by flash column chromatography (50% ethyl acetate–hexanes) afforded the glycolamide **18** (2.1 mg, 49% over two steps) as a colorless oil.

Glycolamide **18** (**NSC#768544**): TLC: 50% ethyl acetate–hexanes,  $R_f$  = 0.35 (CAM).  $^1\text{H}$  NMR (600 MHz,  $\text{CDCl}_3$ )  $\delta$ : 6.89 (dd,  $J_1$  = 15.8,  $J_2$  = 6.7 Hz, 1H), 6.45 (d,  $J$  = 9.6 Hz, 1H), 5.71 (d,  $J$  = 15.8 Hz, 1H), 5.05 (d,  $J$  = 10.3 Hz, 1H), 4.48 – 4.38 (m, 1H), 4.13 (s, 2H), 2.65 (dd,  $J_1$  = 14.3,  $J_2$  = 9.0 Hz, 1H), 2.15 – 2.05 (m, 2H), 2.00 – 1.98 (m, 1H), 1.86 – 1.79 (m, 1H), 1.79 – 1.73 (m, 4H), 1.72 – 1.64 (m, 2H), 1.64 – 1.57 (m, 2H), 1.49 (dd,  $J_1$  14.4,  $J_2$  = 4.0 Hz, 1H), 1.35 – 1.20 (m, 6H), 1.16 (s, 3H), 1.16 – 1.11 (m, 2H), 1.00 (d,  $J$  = 6.8 Hz, 3H), 0.93 (d,  $J$  = 7.0 Hz, 3H), 0.91 (d,  $J$  = 7.1 Hz, 3H).  $^{13}\text{C}$  NMR (151 MHz,  $\text{CDCl}_3$ )  $\delta$ : 170.3, 165.9, 155.1, 118.9, 85.3, 84.8, 71.2, 62.3, 50.9, 48.3, 46.8, 40.9, 40.6, 33.4, 31.8, 31.3, 31.1, 26.1, 25.9, 24.6, 20.1, 18.4, 17.6, 17.1. FTIR

(NaCl, thin film),  $\text{cm}^{-1}$ : 3358, 2926, 2855, 1719, 1653. HRMS: APCI  $[\text{M} + \text{H}]^+$  Calcd. for  $\text{C}_{26}\text{H}_{42}\text{NO}_5$ : 448.3063. Found: 448.3051.

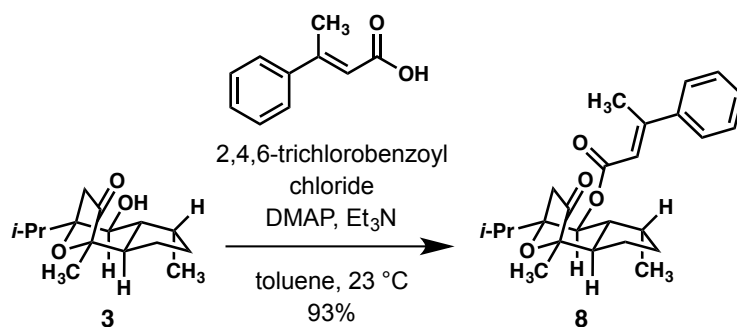

(*E*)-3-phenylbut-2-enoic acid (129 mg, 0.793 mmol, 2.0 equiv), triethylamine (0.17 mL, 1.2 mmol, 3.0 equiv), 2,4,6-trichlorobenzoyl chloride (0.15 mL, 0.99 mmol, 2.5 equiv), and 4-dimethylaminopyridine (10 mg, 79  $\mu\text{mol}$ , 0.2 equiv) were added sequentially to a solution of **3** (0.100 mg, 0.396 mmol, 1.00 equiv) in toluene (50 mL). The reaction mixture was stirred at 23  $^\circ\text{C}$  for 2 d, then excess acid chloride was quenched by the addition of 1N aqueous hydrochloric acid solution (20 mL). The layers were separated and the aqueous layer was extracted with dichloromethane (3  $\times$  20 mL). The combined organic layers were washed with saturated aqueous sodium bicarbonate solution (20 mL), dried over anhydrous sodium sulfate, and the dried solution was concentrated. The resulting residue was purified by flash column chromatography (5% ethyl acetate–hexanes) to afford **8** (146 mg, 93%) as a pale yellow oil.

Ketoester **8**: TLC: 20% ethyl acetate–hexanes,  $R_f$  = 0.57 (UV, CAM).  $^1\text{H}$  NMR (500 MHz,  $\text{CDCl}_3$ ),  $\delta$ : 7.48–7.47 (m, 2H), 7.38–7.37 (m, 3H), 6.06 (s, 1H), 5.34 (d,  $J$  = 11.0 Hz, 1H), 2.58 (s, 3H), 2.49 (ab, 1H), 2.15–2.11 (m, 1H), 2.00–1.93 (m, 1H), 1.91–1.78 (m, 2H), 1.68–1.63 (m, 1H), 1.55–1.49 (m, 1H), 1.26 (s, 3H), 1.22–1.19 (m, 2H), 1.05 (d,  $J$  = 7.0 Hz, 3H), 1.03 (d,  $J$  = 7.0 Hz, 3H), 0.96 (d,  $J$  = 7.0 Hz, 3H).  $^{13}\text{C}$  NMR (125 MHz,  $\text{CDCl}_3$ ),  $\delta$ : 215.3, 165.2, 156.6, 142.0, 129.2, 128.5, 126.3, 116.7, 83.5, 82.4, 70.0, 48.4, 46.1, 42.7, 33.0, 31.1, 30.7, 23.3, 18.1, 17.9, 17.5, 16.9. FTIR (NaCl, thin film),  $\text{cm}^{-1}$ : 2955, 2925, 1756, 1717, 1153. HRMS: APCI  $[\text{M} + \text{H}]^+$  Calcd. for  $\text{C}_{25}\text{H}_{33}\text{O}_4$ : 397.2373. Found: 397.2393.

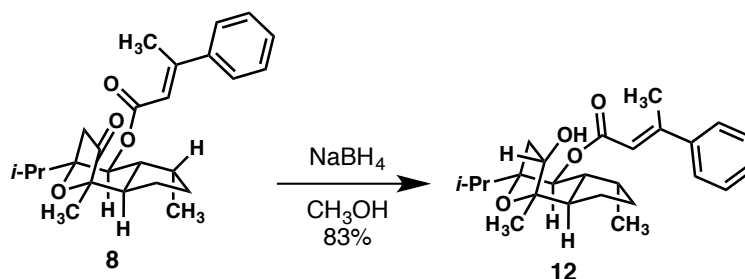

Sodium borohydride (5.2 mg, 0.14 mmol, 3.0 equiv) was added to a solution of **8** (18 mg, 45  $\mu\text{mol}$ , 1.0 equiv) in methanol (25 mL) at 0 °C. The resultant mixture was stirred at 0 °C for 30 min, and then the excess sodium borohydride was quenched by the addition of saturated aqueous ammonium chloride solution (25 mL). The mixture was extracted with dichloromethane (3  $\times$  20 mL), the combined organic layers were dried over anhydrous sodium sulfate, and the dried solution was concentrated. Purification of the residue by flash column chromatography (20% ethyl acetate–hexanes) afforded **12** (15 mg, 83%) as a colorless oil.

Hydroxyester **12**: TLC: 20% ethyl acetate–hexanes,  $R_f$  = 0.30 (UV, CAM).  $^1\text{H}$  NMR (500 MHz,  $\text{CDCl}_3$ ),  $\delta$ : 7.49–7.47 (m, 2H), 7.39–7.35 (m, 3H), 6.08 (s, 1H), 5.19 (d,  $J$  = 10.0 Hz, 1H), 4.17 (dd,  $J_1$  = 11.0 Hz,  $J_2$  = 5.0 Hz, 1H), 2.58 (s, 3H), 2.36–2.30 (m, 2H), 2.19–2.15 (m, 1H), 2.03 (dd,  $J_1$  = 14.0 Hz,  $J_2$  = 5.0 Hz, 1H), 1.99–1.93 (m, 1H), 1.85–1.78 (m, 3H), 1.69–1.62 (m, 1H), 1.32 (s, 3H), 1.22–1.19 (m, 1H), 0.98–0.95 (m, 3H).  $^{13}\text{C}$  NMR (125 MHz,  $\text{CDCl}_3$ ),  $\delta$ : 215.3, 165.2, 156.6, 142.0, 129.2, 128.5, 126.3, 116.7, 83.5, 82.4, 70.0, 48.4, 46.1, 42.7, 33.0, 31.1, 30.7, 23.3, 18.1, 17.9, 17.5, 16.9. FTIR (NaCl, thin film),  $\text{cm}^{-1}$ : 3447, 2964, 2926, 1714, 1626, 1165. HRMS: APCI  $[\text{M} + \text{H}]^+$  Calcd. for  $\text{C}_{25}\text{H}_{35}\text{O}_4$ : 399.2535. Found: 399.2519.

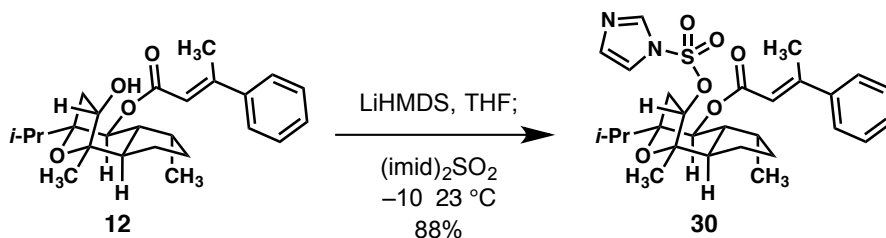

A solution of *n*-butyllithium (2.50 M in hexanes, 84.0  $\mu\text{L}$ , 0.21 mmol, 7.00 equiv) was added to a stirred solution of hexamethyldisilazane (49  $\mu\text{L}$ , 0.23 mmol, 7.7 equiv) in tetrahydrofuran (5 mL) at 0 °C. The reaction mixture was briefly warmed to 23 °C, then was cooled to 0 °C whereupon a solution of **12** (12 mg, 30  $\mu\text{mol}$ , 1.0 equiv) in tetrahydrofuran (2 mL) was added. The resultant mixture was stirred at 0 °C for 30 min, then was cooled to –10 °C whereupon *N,N'*-

Imidazole **30**: TLC: 20% ethyl acetate–hexanes,  $R_f$  = 0.33 (UV, CAM).  $^1\text{H}$  NMR (500 MHz,  $\text{CDCl}_3$ ),  $\delta$ : 8.01 (s, 1H), 7.49–7.47 (m, 3H), 7.39–7.35 (m, 4H), 7.22 (s, 1H), 6.06 (s, 1H), 5.16 (d,  $J$  = 10.5 Hz, 1H), 4.57 (dd,  $J_1$  = 11.0 Hz,  $J_2$  = 4.5 Hz, 1H), 2.57 (s, 3H), 2.27–2.16 (m, 2H), 2.12–2.08 (dd,  $J_1$  = 14.5 Hz,  $J_2$  = 4.5 Hz, 1H), 2.04–1.94 (m, 2H), 1.89–1.83 (m, 1H), 1.76–1.67 (m, 3H), 1.23–1.22 (m, 1H), 1.19 (s, 3H), 0.95 (d,  $J$  = 7.0 Hz, 3H), 0.93 (d,  $J$  = 6.5 Hz, 3H), 0.92 (d,  $J$  = 7.0 Hz, 3H).  $^{13}\text{C}$  NMR (125 MHz,  $\text{CDCl}_3$ ),  $\delta$ : 165.2, 156.5, 142.0, 137.1, 131.6, 129.2, 128.5, 126.3, 117.9, 116.8, 90.5, 85.3, 81.1, 70.4, 48.8, 46.4, 35.7, 32.5, 31.1, 29.7, 24.0, 22.5, 18.1, 17.4, 16.8. FTIR (NaCl, thin film),  $\text{cm}^{-1}$ : 2925, 2854, 1718, 1627, 1423, 1203, 1158. HRMS: ESI  $[\text{M} + \text{H}]^+$  Calcd. for  $\text{C}_{28}\text{H}_{37}\text{N}_2\text{O}_6\text{S}$ : 529.2367. Found: 529.2346.

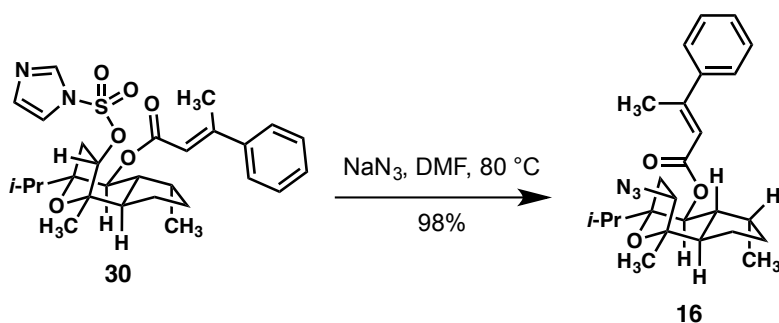

C-S22

Purification of the residue by flash column chromatography (5% ethyl acetate–hexanes) afforded the azide **16** (11 mg, 98%) as a colorless oil.

Azide **16**: TLC: 20% ethyl acetate–hexanes,  $R_f$  = 0.79 (UV, CAM).  $^1\text{H}$  NMR (500 MHz,  $\text{CDCl}_3$ ),  $\delta$ : 7.49–7.45 (m, 2H), 7.38–7.37 (m, 3H), 6.06 (s, 1H), 5.09 (d,  $J$  = 10.5 Hz, 1H), 3.61 (dd,  $J_1$  = 8.5 Hz,  $J_2$  = 3.5 Hz, 1H), 2.58 (s, 3H), 2.54 (dd,  $J_1$  = 14.5 Hz,  $J_2$  = 8.5 Hz, 2H), 2.16–2.12 (m, 1H), 2.07–1.99 (m, 2H), 1.92–1.89 (m, 3H), 1.81–1.68 (m, 2H), 1.47–1.41 (m, 1H), 1.33 (s, 3H), 1.03 (d,  $J$  = 7.0 Hz, 3H), 0.98 (d,  $J$  = 7.0 Hz, 3H), 0.95 (d,  $J$  = 7.0 Hz, 3H).  $^{13}\text{C}$  NMR (125 MHz,  $\text{CDCl}_3$ ),  $\delta$ : 165.3, 156.1, 142.2, 129.1, 128.5, 126.3, 117.1, 85.6, 85.5, 70.7, 63.4, 48.2, 47.1, 38.6, 32.9, 31.2, 29.7, 24.8, 20.2, 18.2, 17.5, 17.0. FTIR (NaCl, thin film),  $\text{cm}^{-1}$ : 2927, 2855, 2094, 1717, 1626, 1270, 1162. HRMS: APCI  $[\text{M} + \text{H}]^+$  Calcd. for  $\text{C}_{25}\text{H}_{34}\text{N}_3\text{O}_3$ : 424.2600. Found: 424.2613.

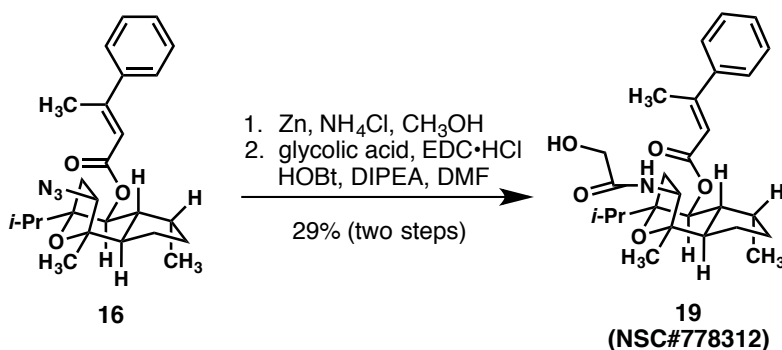

Ammonium chloride (16 mg, 0.31 mmol, 10 equiv) and zinc (dust, 20 mg, 0.31 mmol, 10 equiv) were added sequentially to a solution of **16** (13 mg, 31  $\mu\text{mol}$ , 1.0 equiv) in methanol (3 mL). The reaction mixture was stirred vigorously at room temperature for 2 h, then was concentrated. The resulting residue was triturated with diethyl ether ( $3 \times 10$  mL) and the combined organic fractions were filtered through a pad of silica gel to afford the amine (8.0 mg, 66%), which was advanced without further purification. Glycolic acid (23 mg, 0.31 mmol, 10 equiv), *N*-(3-dimethylaminopropyl)-*N'*-ethylcarbodiimide hydrochloride (59 mg, 0.31 mmol, 10.0 equiv), and 1-hydroxybenzotriazole (41 mg, 0.31 mmol, 10 equiv) were added sequentially to a stirred solution of the amine intermediate in *N,N*-dimethylformamide (15 mL) at 23 °C. The reaction mixture was cooled to 0 °C whereupon *N,N*-diisopropylamine (0.16 mL, 0.92 mmol, 30.0 equiv) was added. The reaction mixture was stirred at 0 °C for 1 h, then allowed to warm to 23 °C and stirred for an additional 18 h. The reaction mixture was quenched with 10% aqueous lithium chloride solution (20 mL), then extracted with dichloromethane ( $3 \times 25$  mL). The combined organic layers were dried over anhydrous sodium sulfate and the dried solution was

concentrated. Purification of the residue by flash column chromatography (50% ethyl acetate–hexanes) afforded the glycolamide **19** (4.0 mg, 29% over two steps) as a colorless oil.

Glycolamide **19** (**NSC#778312**): TLC: 50% ethyl acetate–hexanes,  $R_f$  = 0.35 (UV, CAM).  $^1\text{H}$  NMR: (500 MHz,  $\text{CDCl}_3$ ),  $\delta$  6.89 (dd,  $J_1$  = 15.5 Hz,  $J_2$  = 7.0 Hz, 1H), 6.42 (d,  $J$  = 10.0 Hz, 1H), 5.71 (d,  $J$  = 15.5 Hz, 1H), 5.03 (d,  $J$  = 10.5 Hz, 1H), 4.46–4.41 (m, 1H), 4.14 (s, 2H), 2.65 (dd,  $J_1$  = 14.5 Hz,  $J_2$  = 9.0 Hz, 1H), 2.13–2.10 (m, 2H), 2.04–2.00 (m, 4H), 2.04–1.93 (m, 6H), 1.84–1.79 (m, 2H), 1.77–1.75 (m, 5H), 1.16 (s, 3H), 1.14–1.09 (m, 1H), 1.00 (d,  $J$  = 7.0 Hz, 3H), 0.93 (d,  $J$  = 7.0 Hz, 3H), 0.91 (d,  $J$  = 7.0 Hz, 3H);  $^{13}\text{C}$  NMR: (125 MHz,  $\text{CDCl}_3$ ),  $\delta$  170.1, 166.3, 155.0, 118.7, 85.1, 84.7, 71.0, 62.1, 50.8, 48.1, 46.7, 40.7, 40.4, 33.2, 31.9, 31.7, 30.9, 29.7, 25.9, 25.7, 24.5, 22.7, 20.0, 18.2, 17.5, 16.9. FTIR (NaCl, thin film),  $\text{cm}^{-1}$ : 3397, 2965, 2925, 2854, 1717, 1653. HRMS: APCI  $[\text{M} + \text{H}]^+$  Calcd. for  $\text{C}_{27}\text{H}_{38}\text{NO}_5$ : 456.2750. Found: 456.2763.

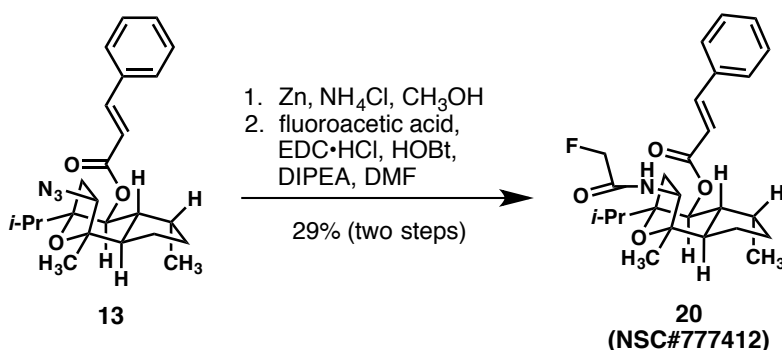

Ammonium chloride (26 mg, 0.49 mmol, 10 equiv) and zinc (dust, 32 mg, 0.49 mmol, 10 equiv) were added sequentially to a solution of **13** (20 mg, 49  $\mu\text{mol}$ , 1.0 equiv) in methanol (3 mL). The reaction mixture was stirred vigorously at room temperature for 2 h, then was concentrated. The resulting residue was triturated with diethyl ether ( $3 \times 10$  mL) and the combined organic fractions were filtered through a pad of silica gel to afford the amine, which was advanced without further purification. Fluoroacetic acid (38 mg, 0.49 mmol, 10 equiv), *N*-(3-dimethylaminopropyl)-*N'*-ethylcarbodiimide hydrochloride (94 mg, 0.49 mmol, 10.0 equiv), and 1-hydroxybenzotriazole (66 mg, 0.49 mmol, 10 equiv) were added sequentially to a stirred solution of the amine intermediate in *N,N*-dimethylformamide (15 mL) at 23  $^\circ\text{C}$ . The reaction mixture was cooled to 0  $^\circ\text{C}$  whereupon *N,N*-diisopropylamine (0.26 mL, 1.47 mmol, 30.0 equiv) was added. The reaction mixture was stirred at 0  $^\circ\text{C}$  for 1 h, then allowed to warm to 23  $^\circ\text{C}$  and stirred for an additional 18 h. The reaction mixture was quenched with 10% aqueous lithium chloride solution (20 mL), then extracted with dichloromethane ( $3 \times 25$  mL). The combined organic layers were dried over anhydrous sodium sulfate and the dried solution was

concentrated. Purification of the residue by flash column chromatography (50% ethyl acetate–hexanes) afforded the glycolamide **20** (6.3 mg, 29% over two steps) as a colorless oil.

Glycolamide **20** (**NSC#777412**): TLC: 20% ethyl acetate–hexanes,  $R_f$  = 0.16 (UV, CAM).  $^1\text{H}$  NMR: (500 MHz,  $\text{CDCl}_3$ ),  $\delta$ : 7.66 (d,  $J$  = 16.0 Hz, 1H), 7.54–7.52 (m, 2H), 7.40–7.38 (m, 3H), 6.40 (d,  $J$  = 16.0 Hz, 1H), 6.30–6.28 (m, 1H), 5.15 (d,  $J$  = 10.5 Hz, 1H), 4.87 (s, 1H), 4.78 (s, 1H), 4.51–4.46 (m, 1H), 2.73 (dd,  $J_1$  = 14.5 Hz,  $J_2$  = 9.0 Hz, 1H), 2.17–2.13 (m, 1H), 1.97–1.93 (m, 1H), 1.90–1.78 (m, 2H), 1.75–1.63 (m, 2H), 1.38–1.29 (m, 2H), 1.27–1.23 (m, 5H), 1.19 (s, 3H), 1.03 (d,  $J$  = 6.5 Hz, 3H), 0.97 (d,  $J$  = 7.0 Hz, 3H), 0.94 (d,  $J$  = 7.0 Hz, 3H).  $^{13}\text{C}$  NMR: (101 MHz,  $\text{CDCl}_3$ ),  $\delta$ : 166.8 (d,  $J$  = 17.0 Hz), 165.8, 145.4, 134.4, 130.6, 129.0, 128.3, 118.1, 85.3, 84.8, 80.3 (d,  $J$  = 186.2 Hz), 71.5, 50.8, 48.3, 46.9, 40.9, 33.4, 31.3, 31.1, 29.5, 24.7, 22.9, 20.1, 18.4, 17.6, 17.1.  $^{19}\text{F}$  NMR: (376 MHz,  $\text{CDCl}_3$ ),  $\delta$ : –182.4 (d,  $J$  = 145.0 Hz). FTIR (NaCl, thin film),  $\text{cm}^{-1}$ : 2955, 2924, 1710, 1637, 1169. HRMS: APCI  $[\text{M} + \text{H}]^+$  Calcd. for  $\text{C}_{26}\text{H}_{35}\text{FNO}_4$ : 444.2550. Found: 444.2570.

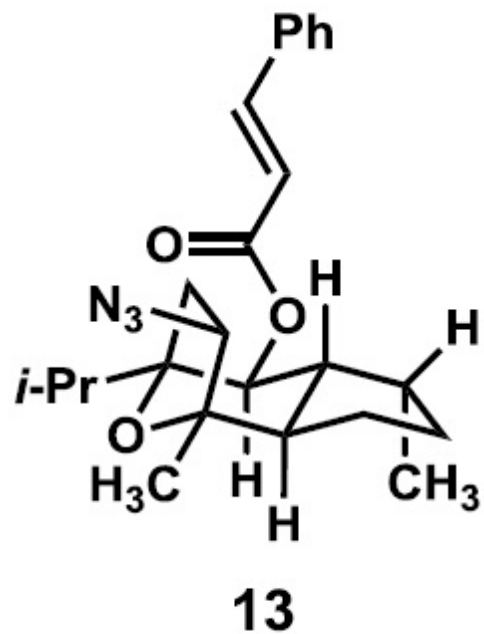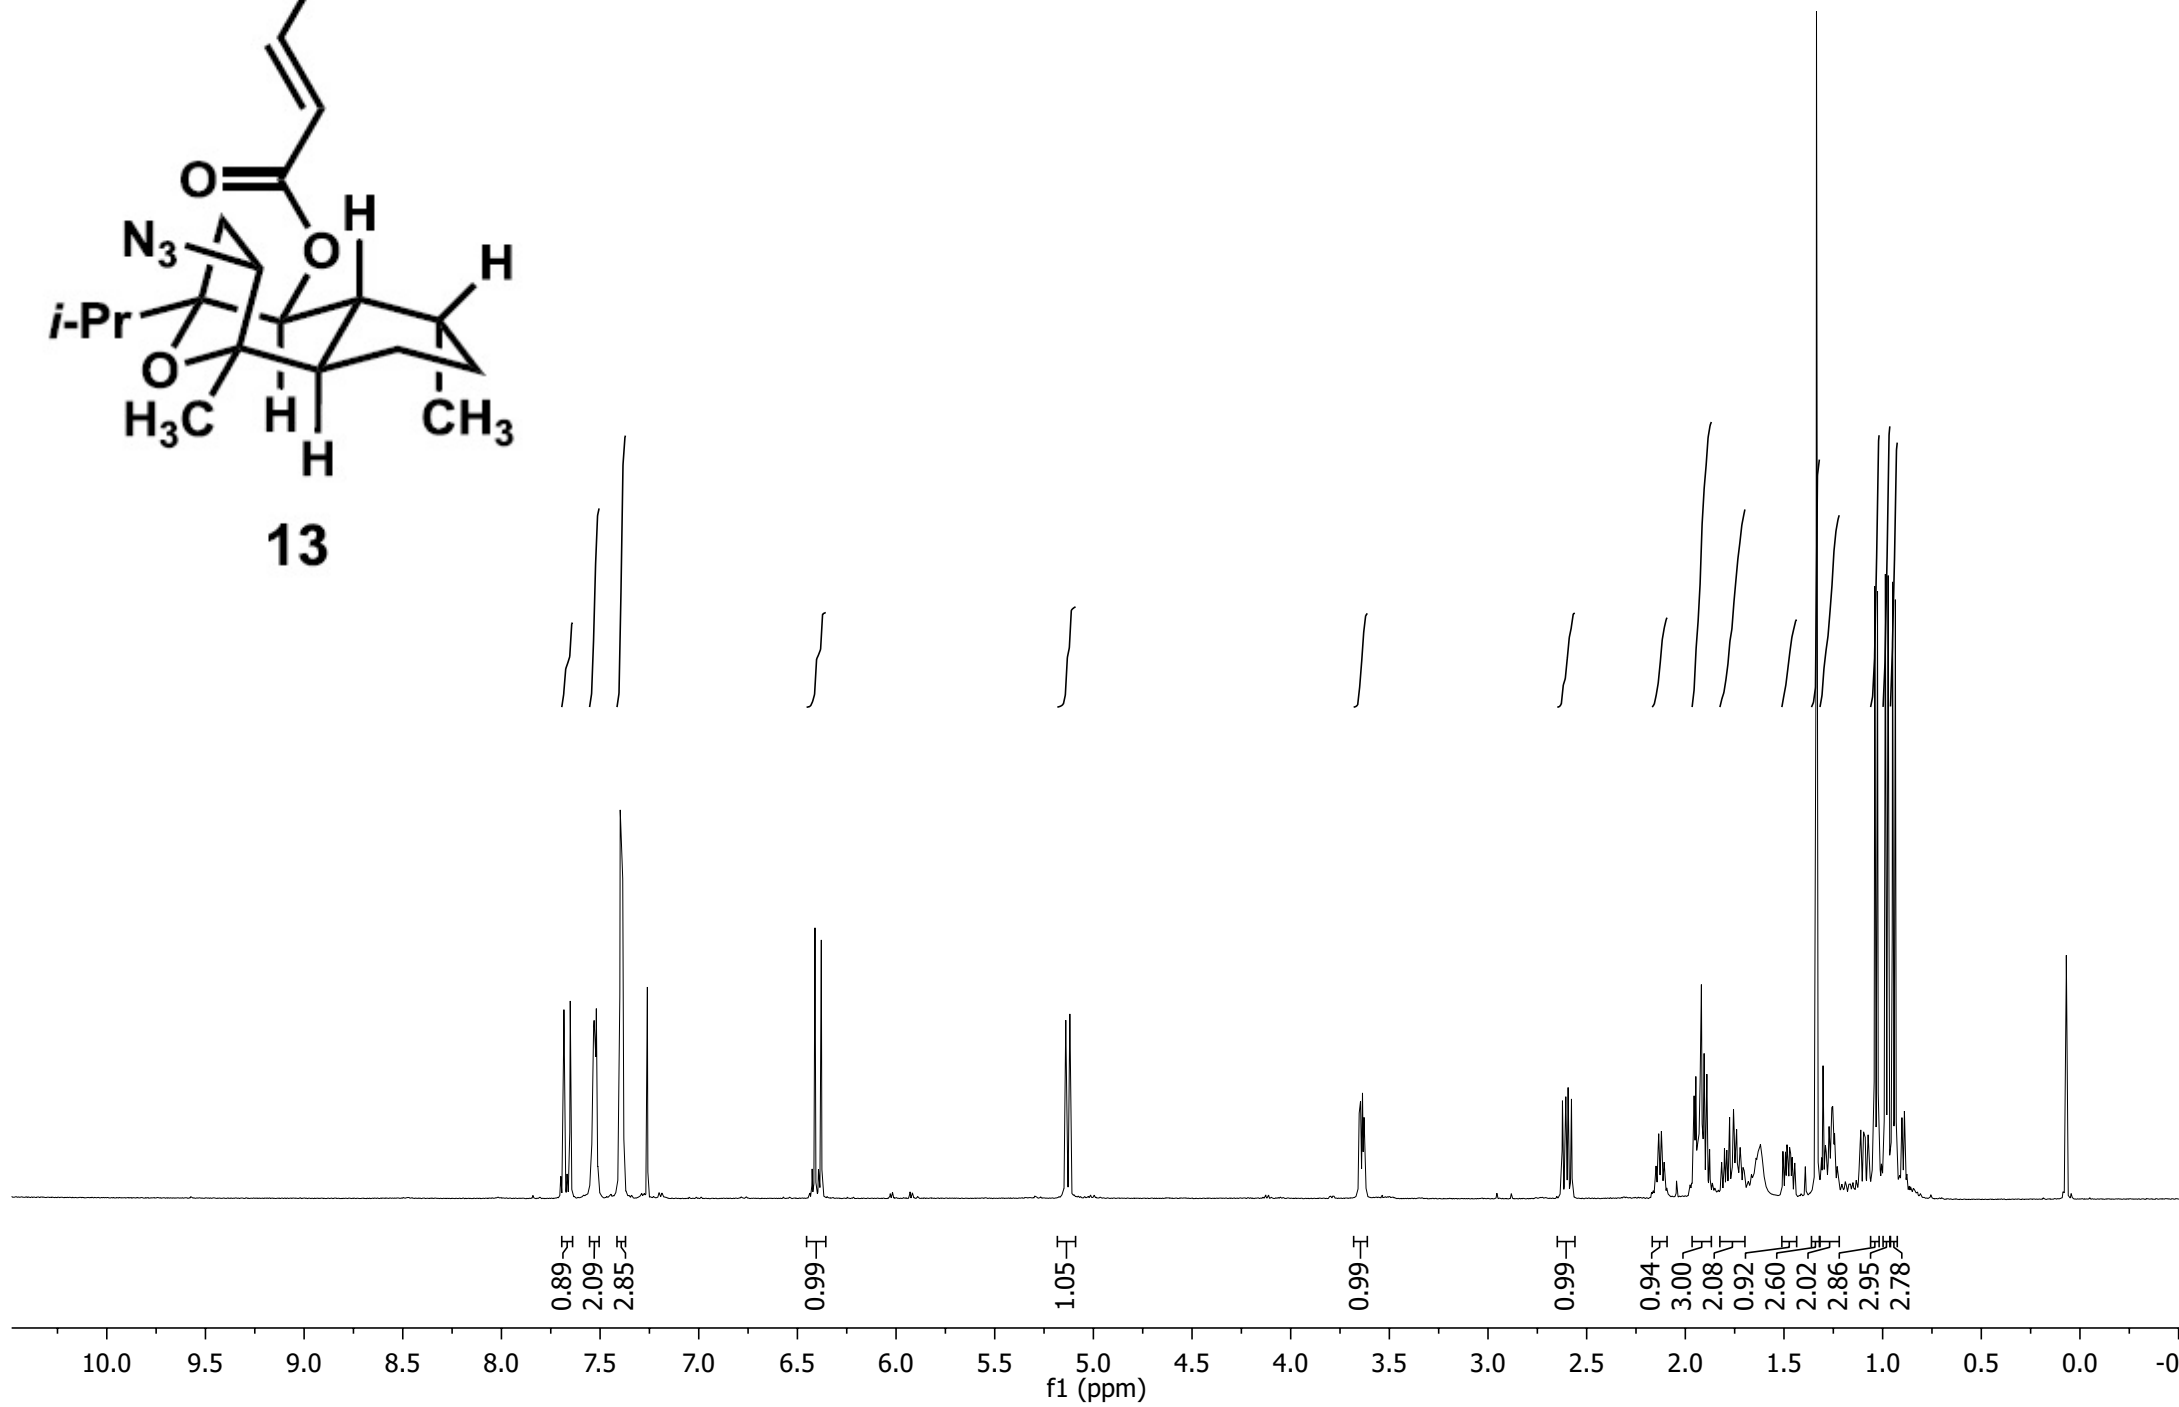

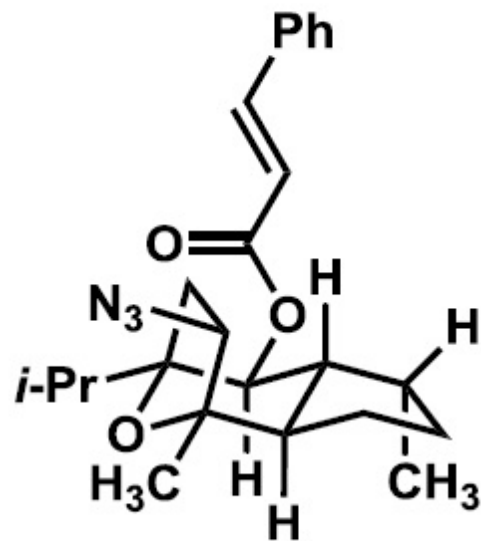

**13**

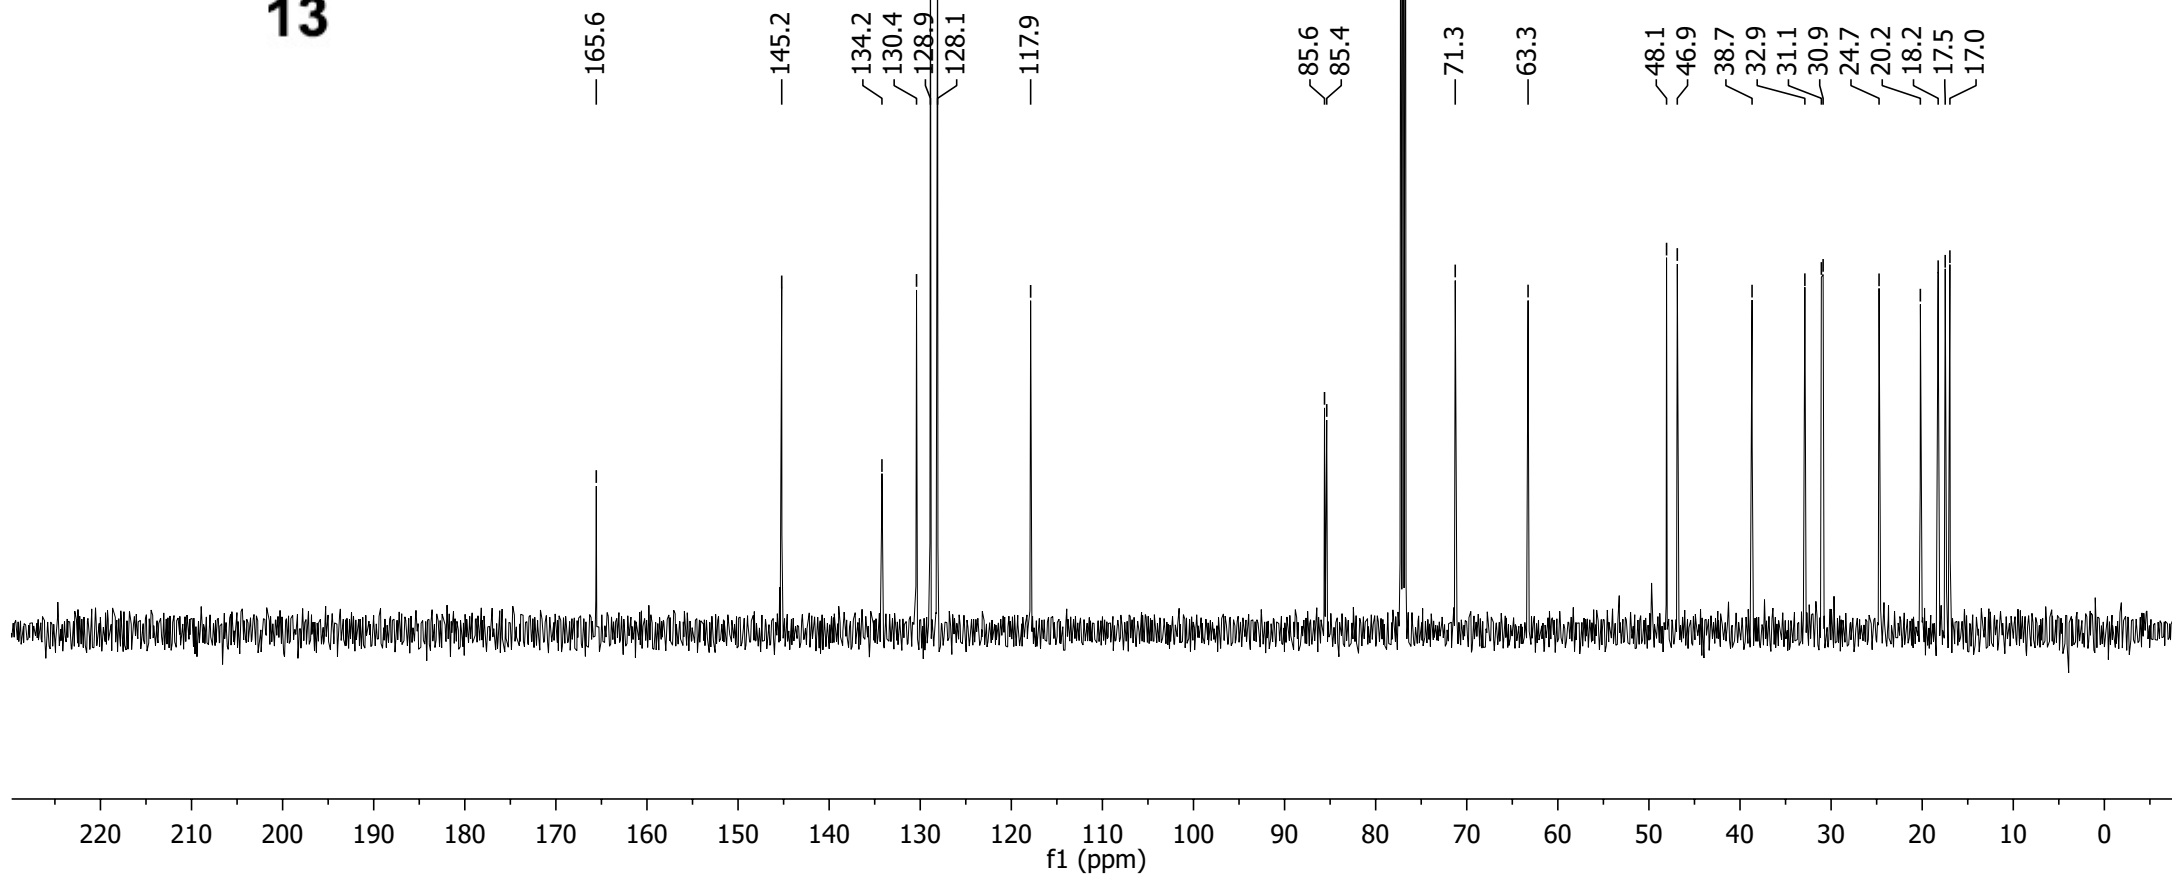

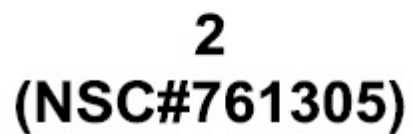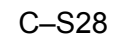

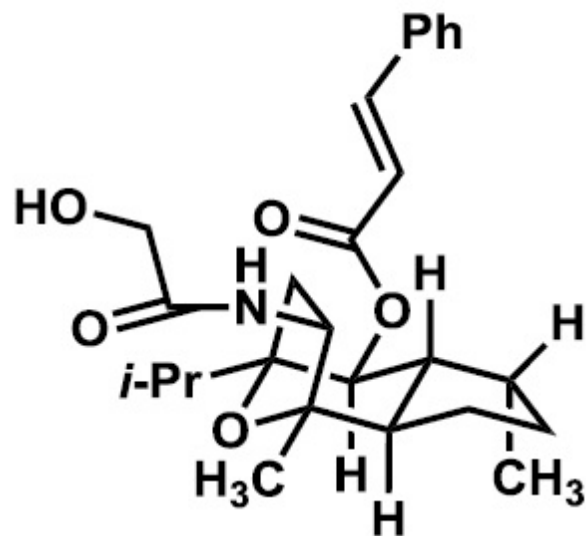

**2**  
**(NSC#761305)**

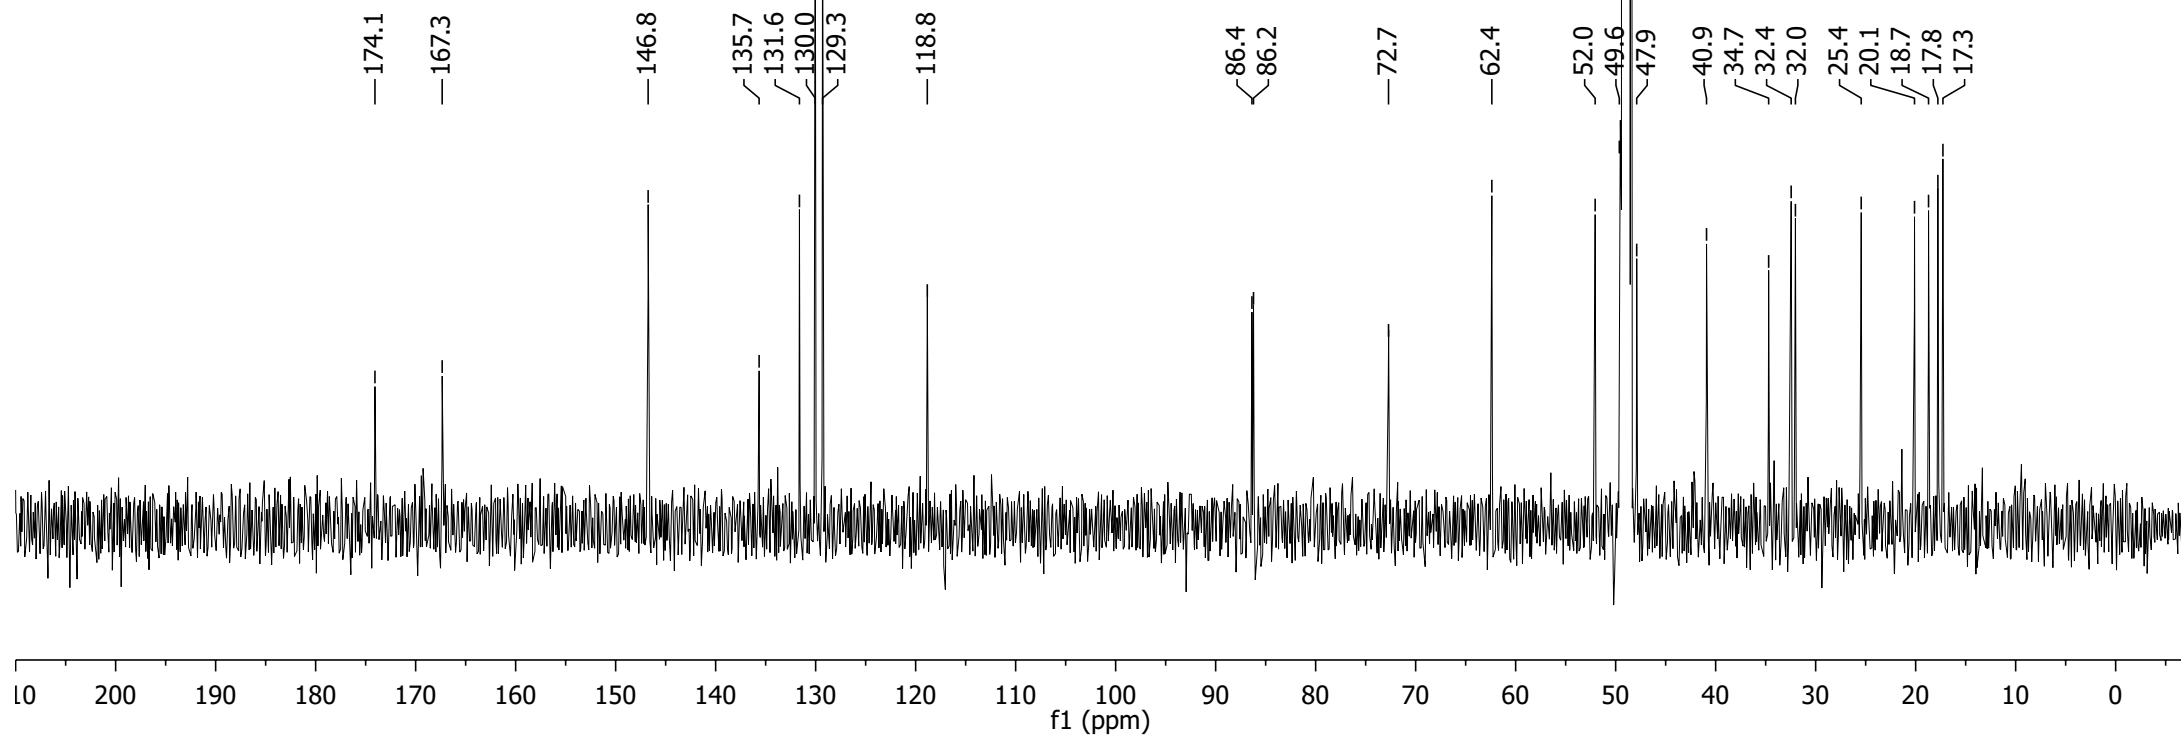

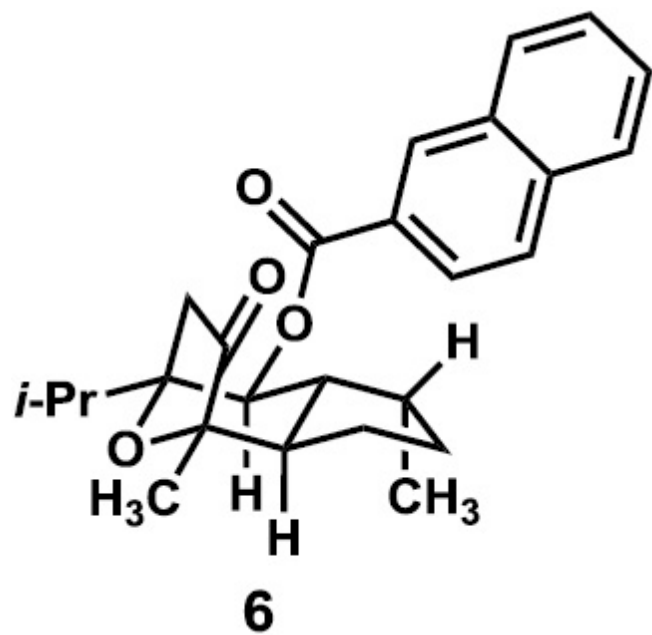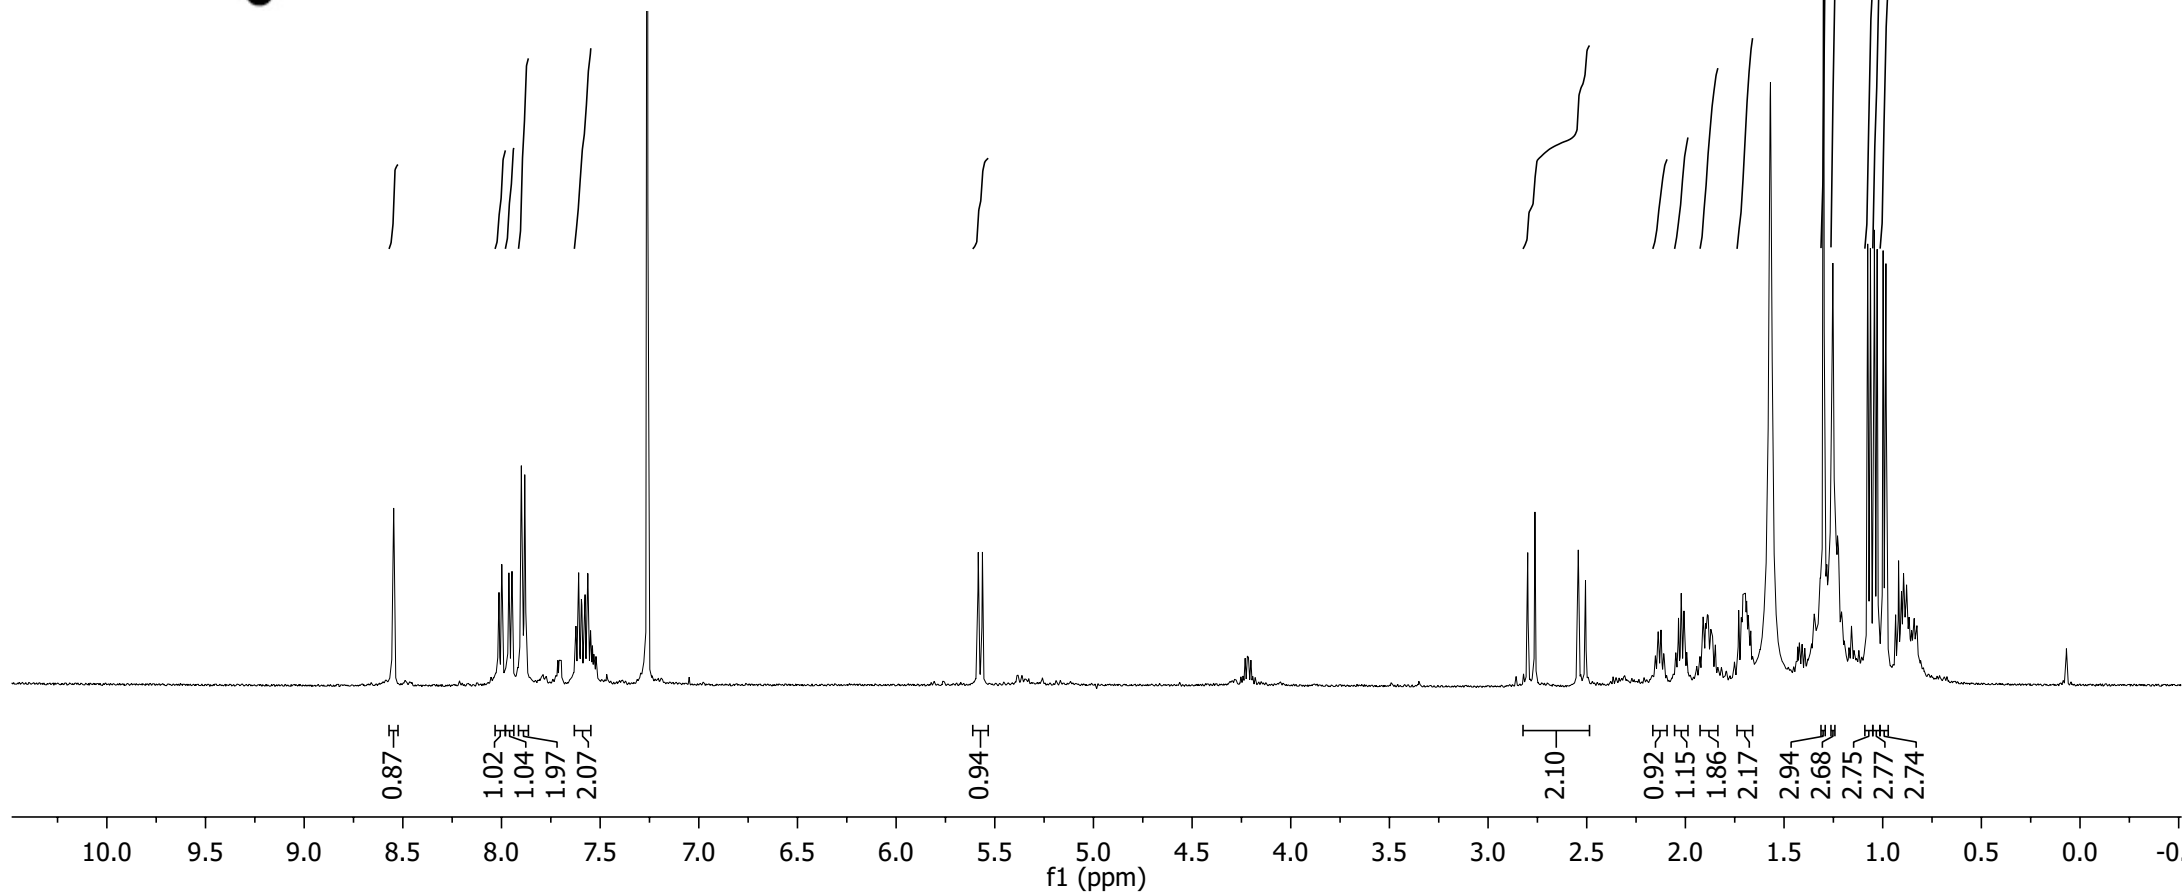

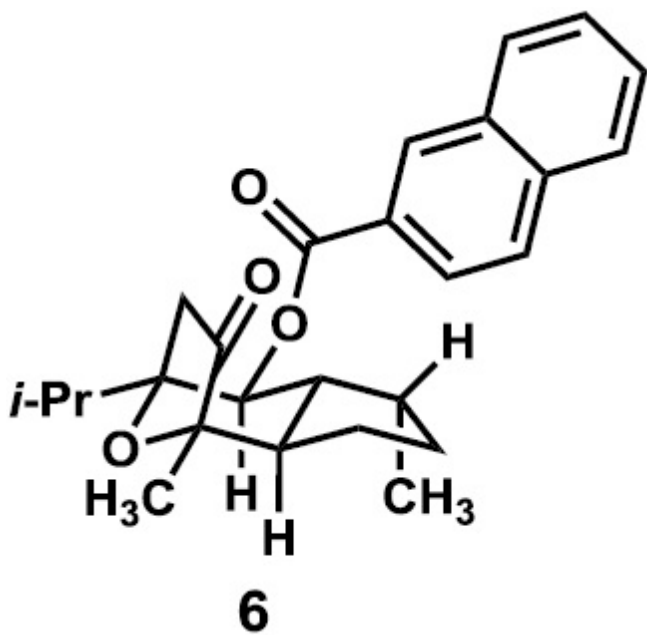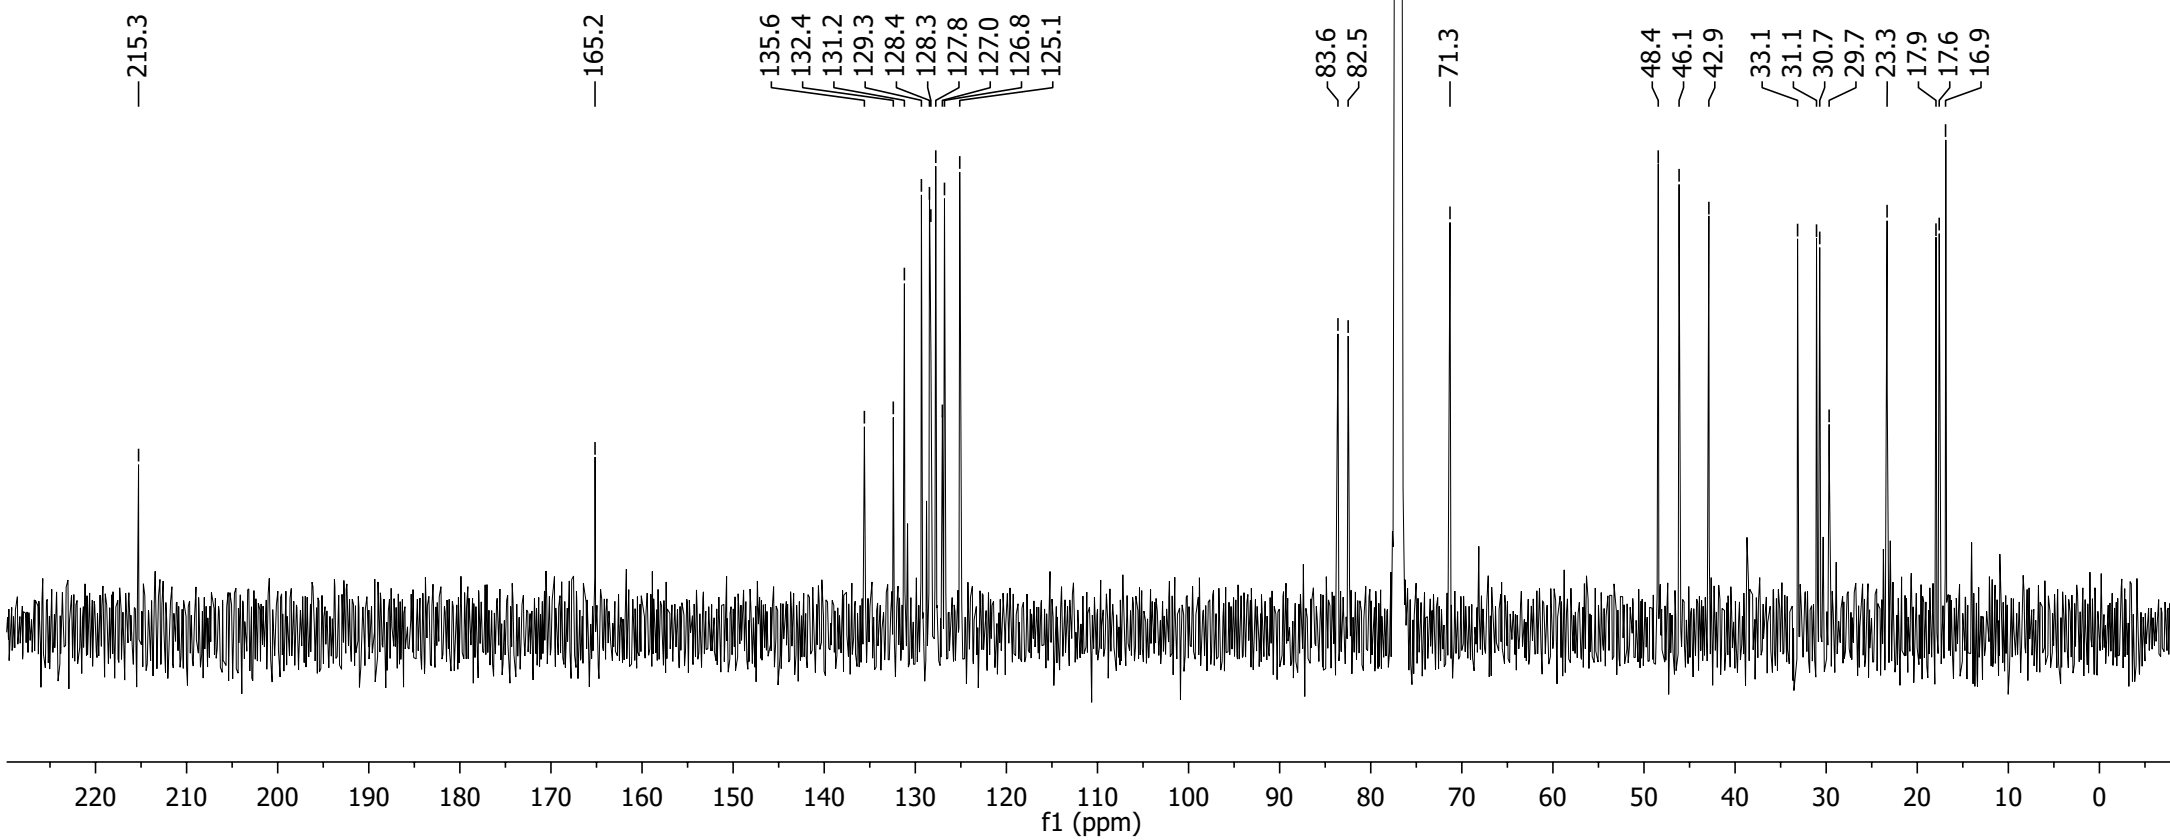

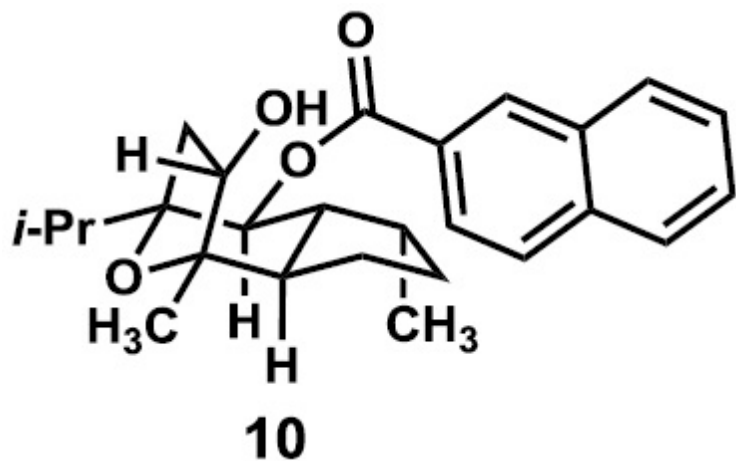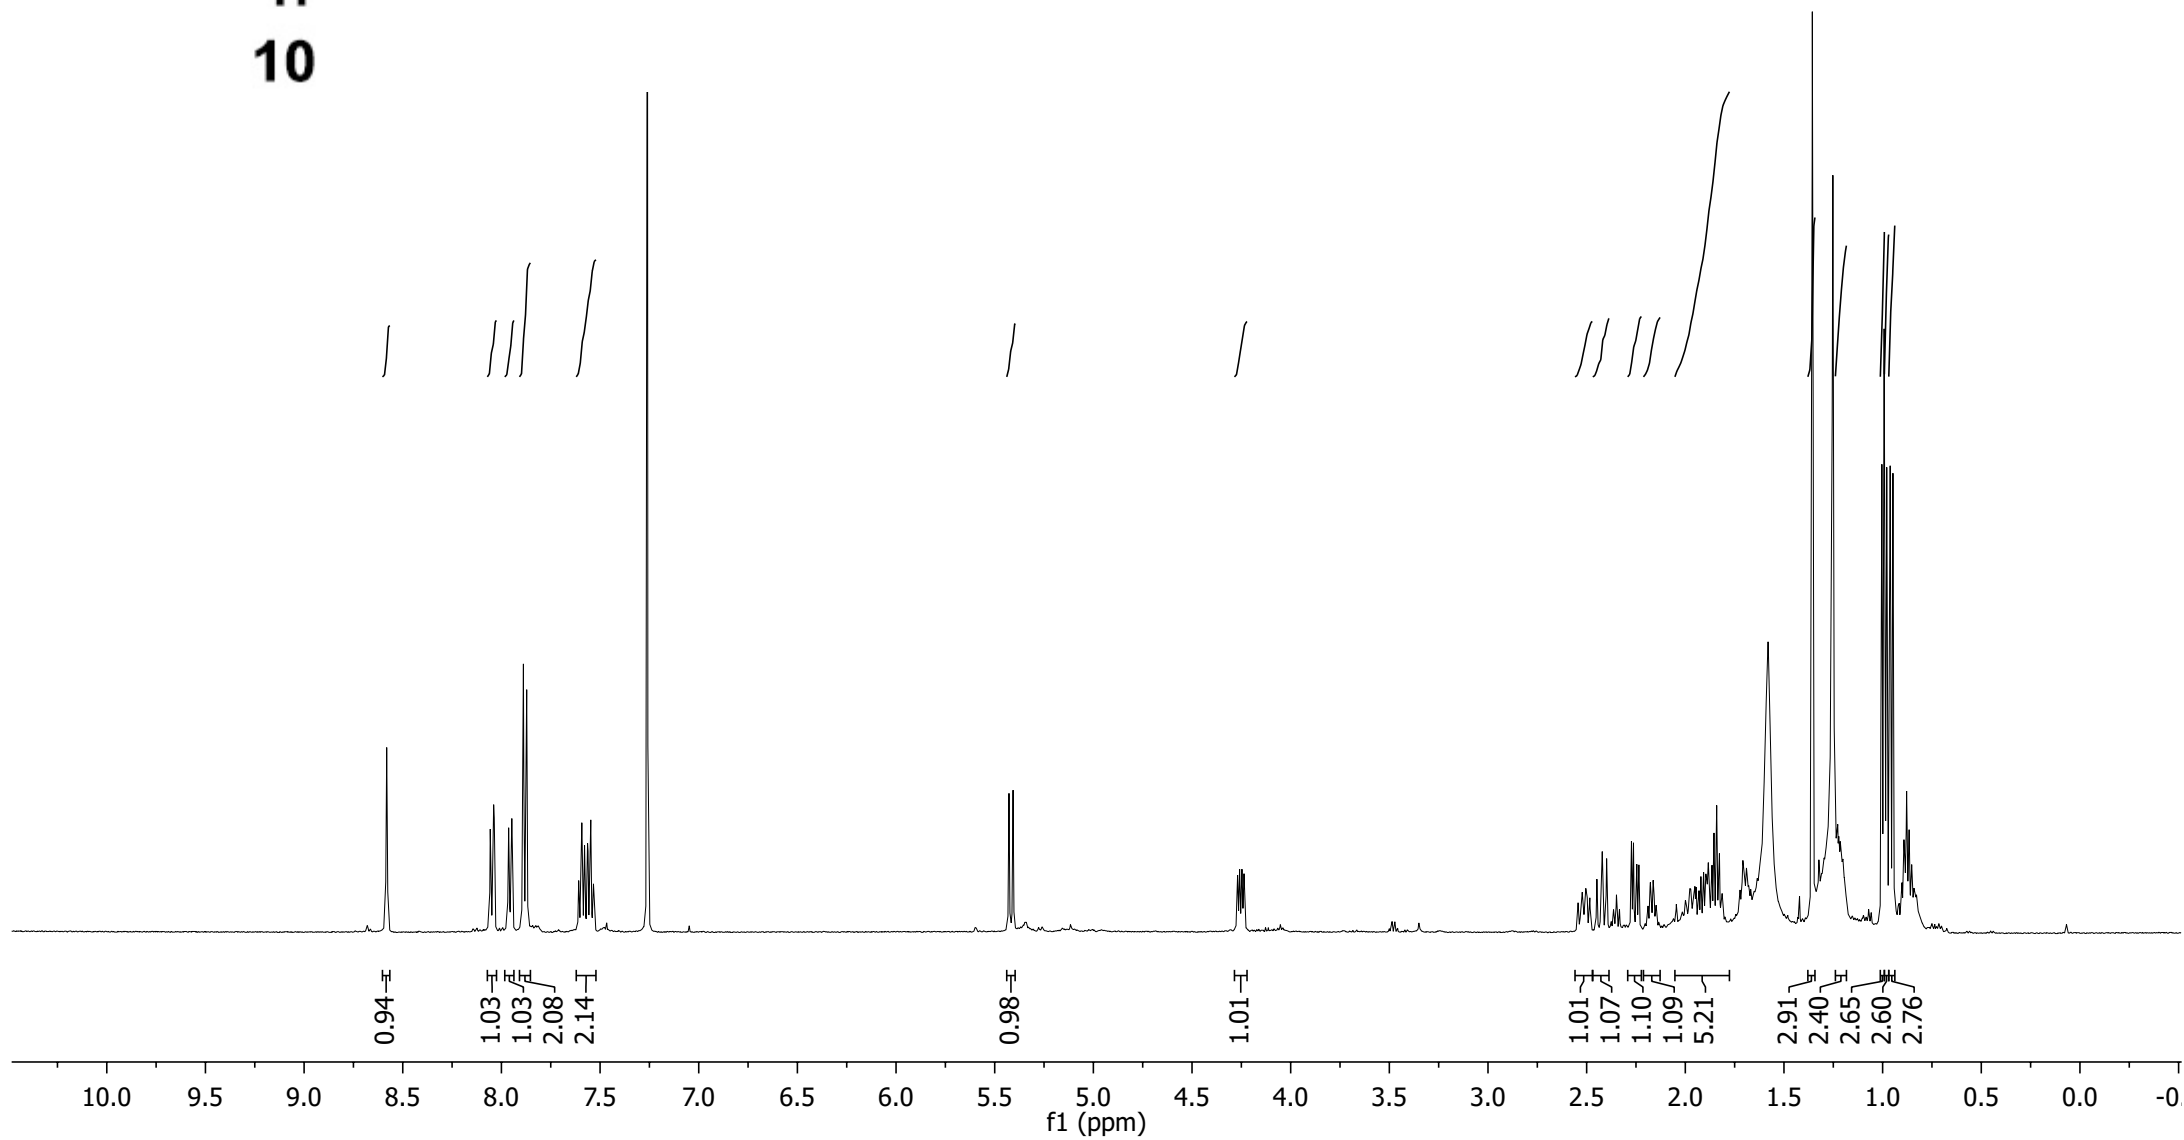

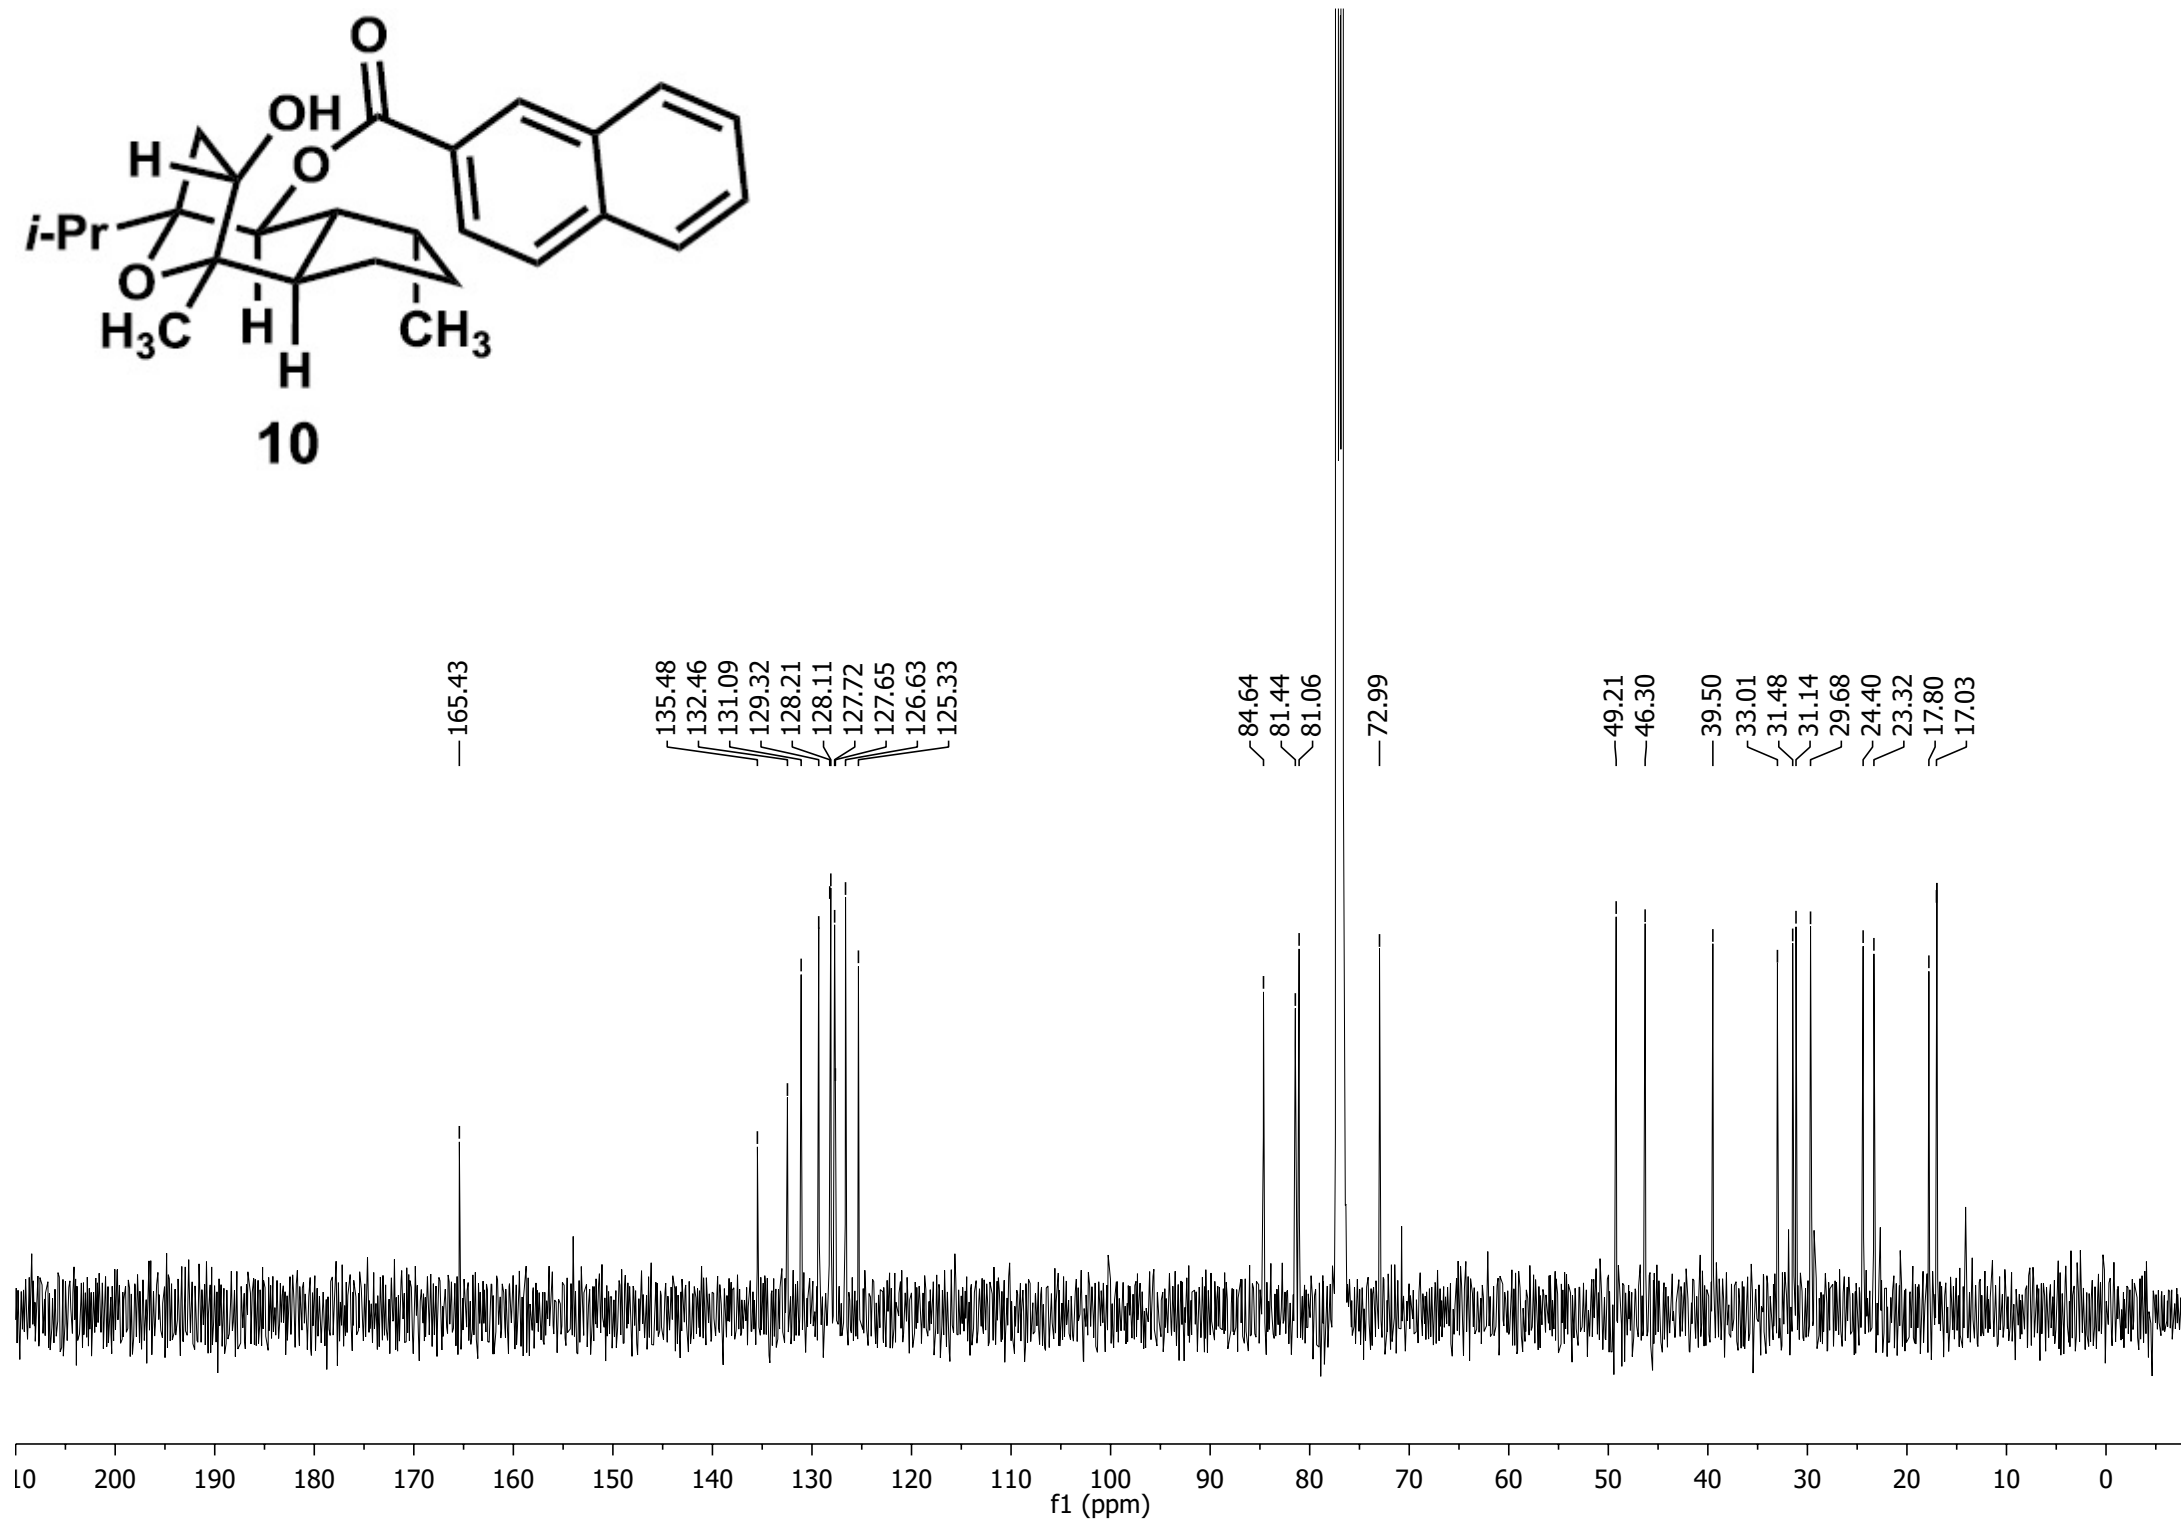

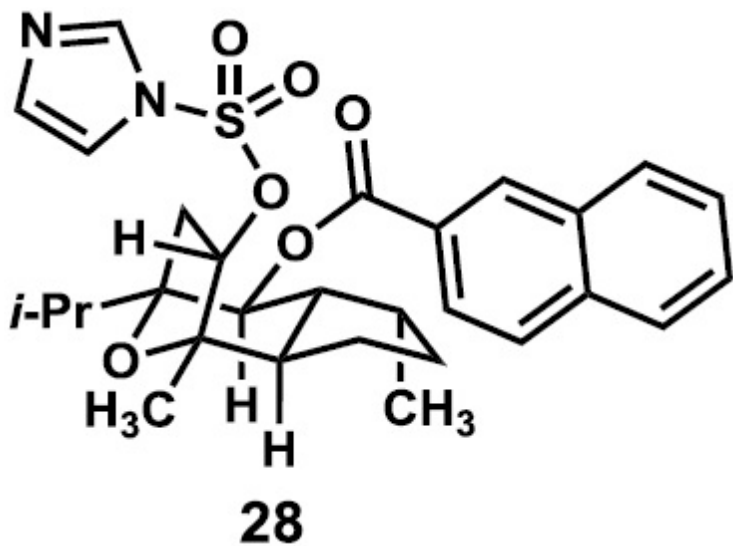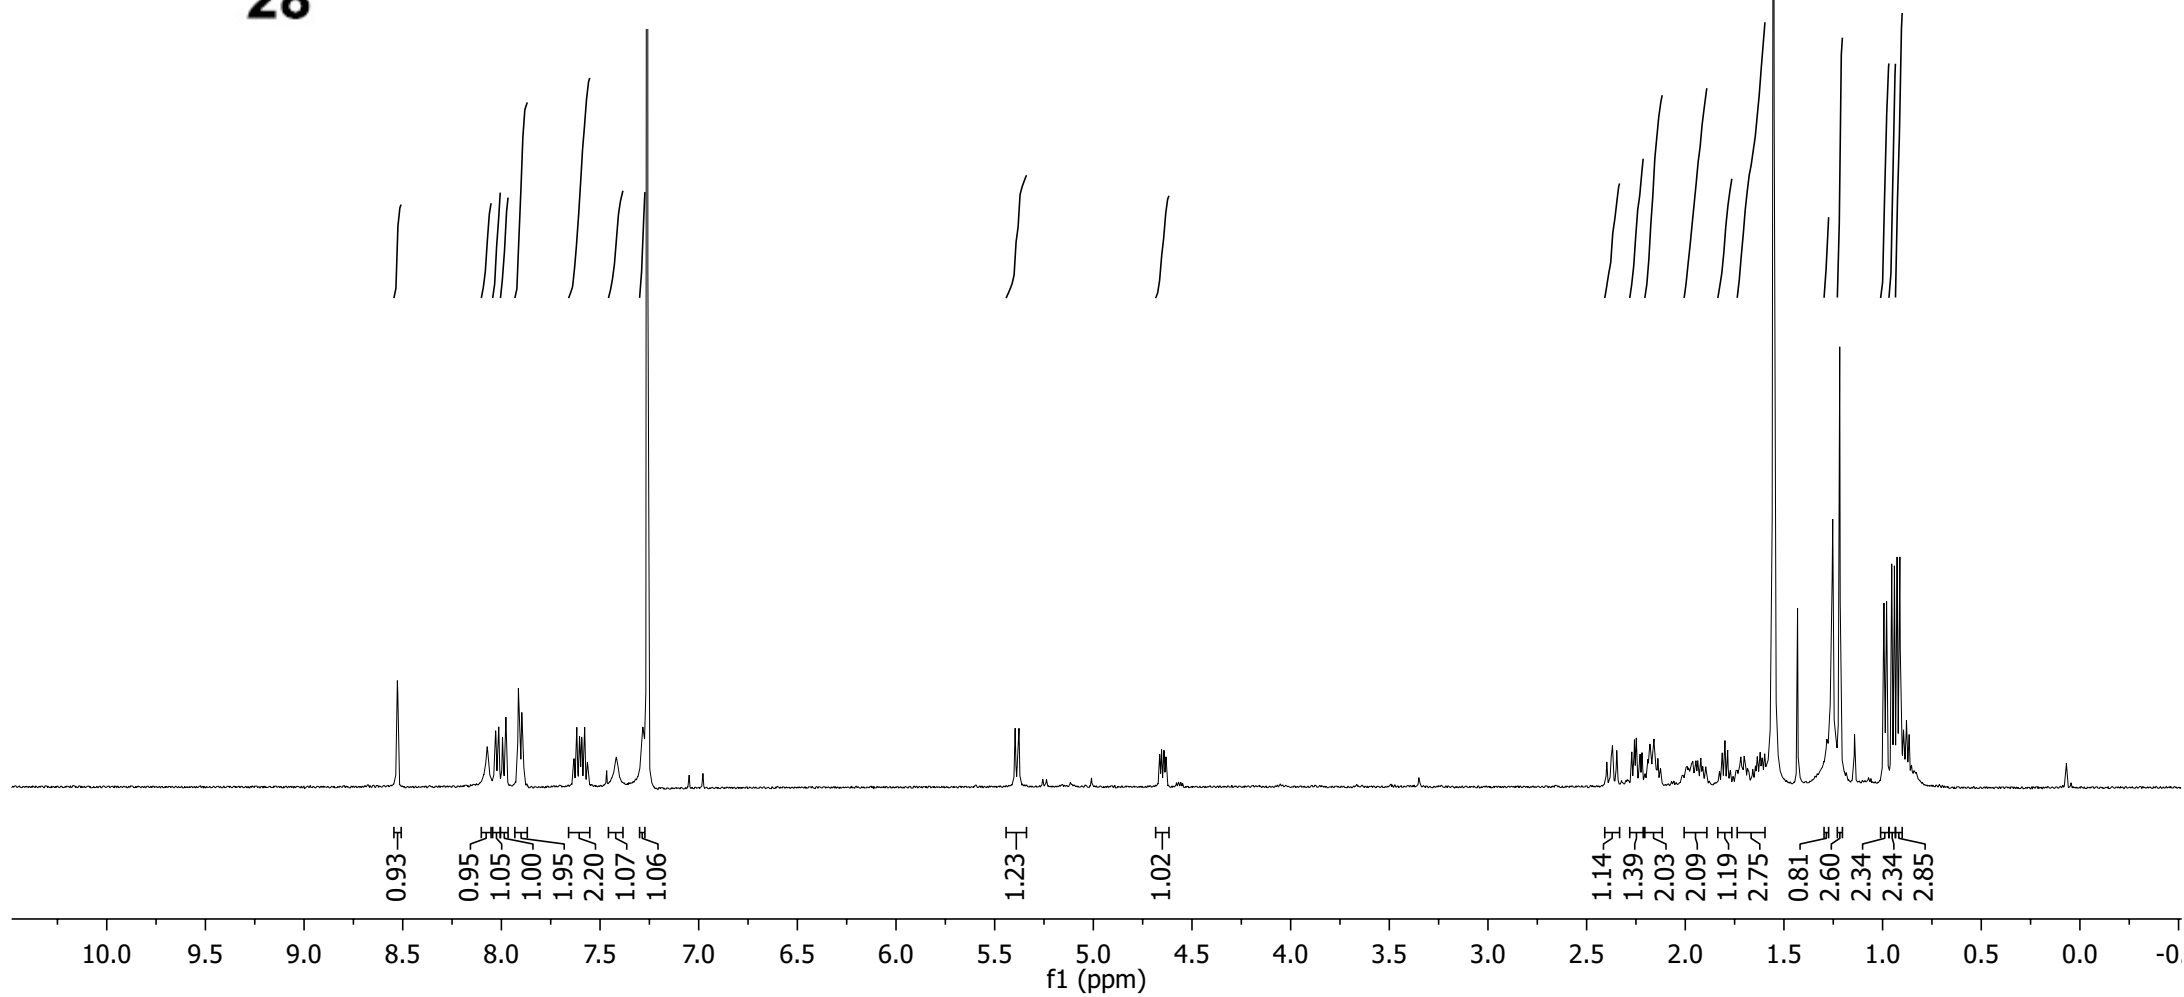

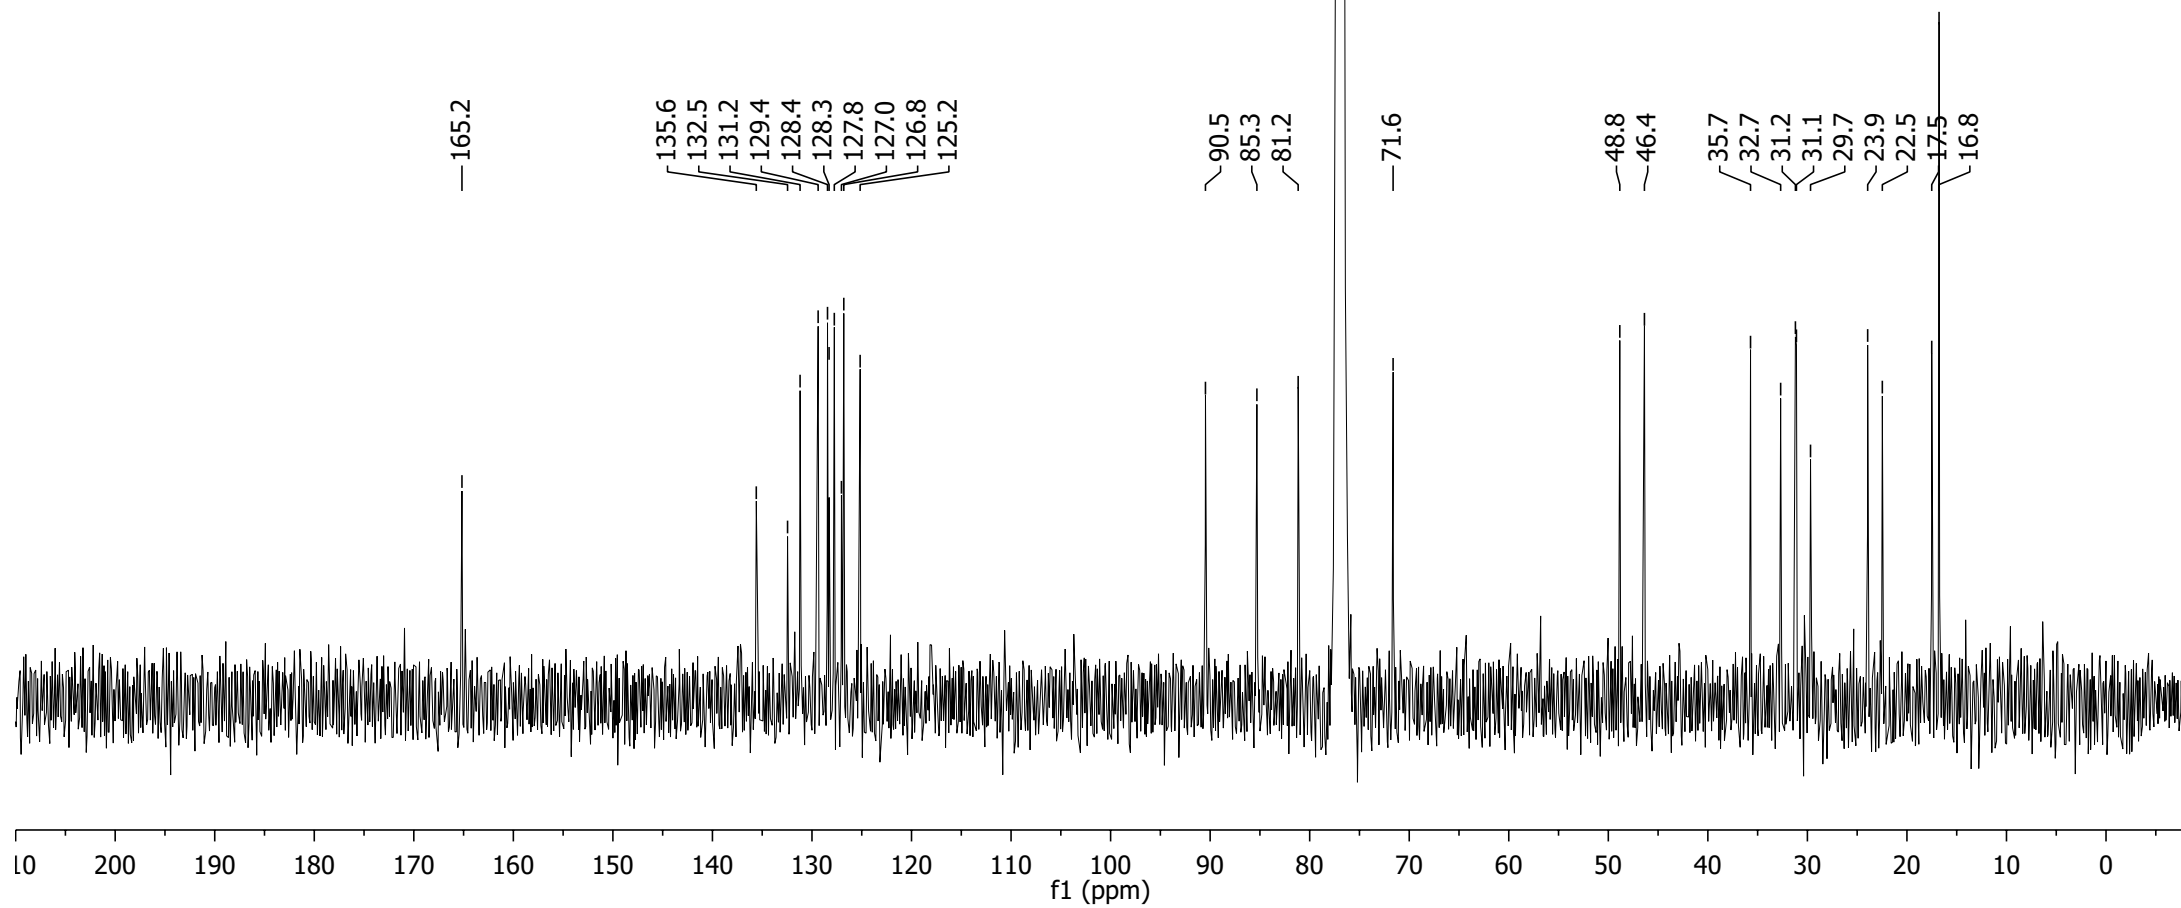

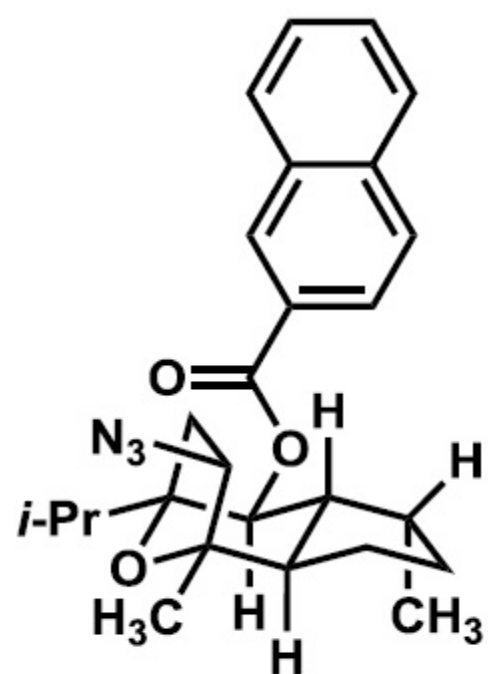

**14**

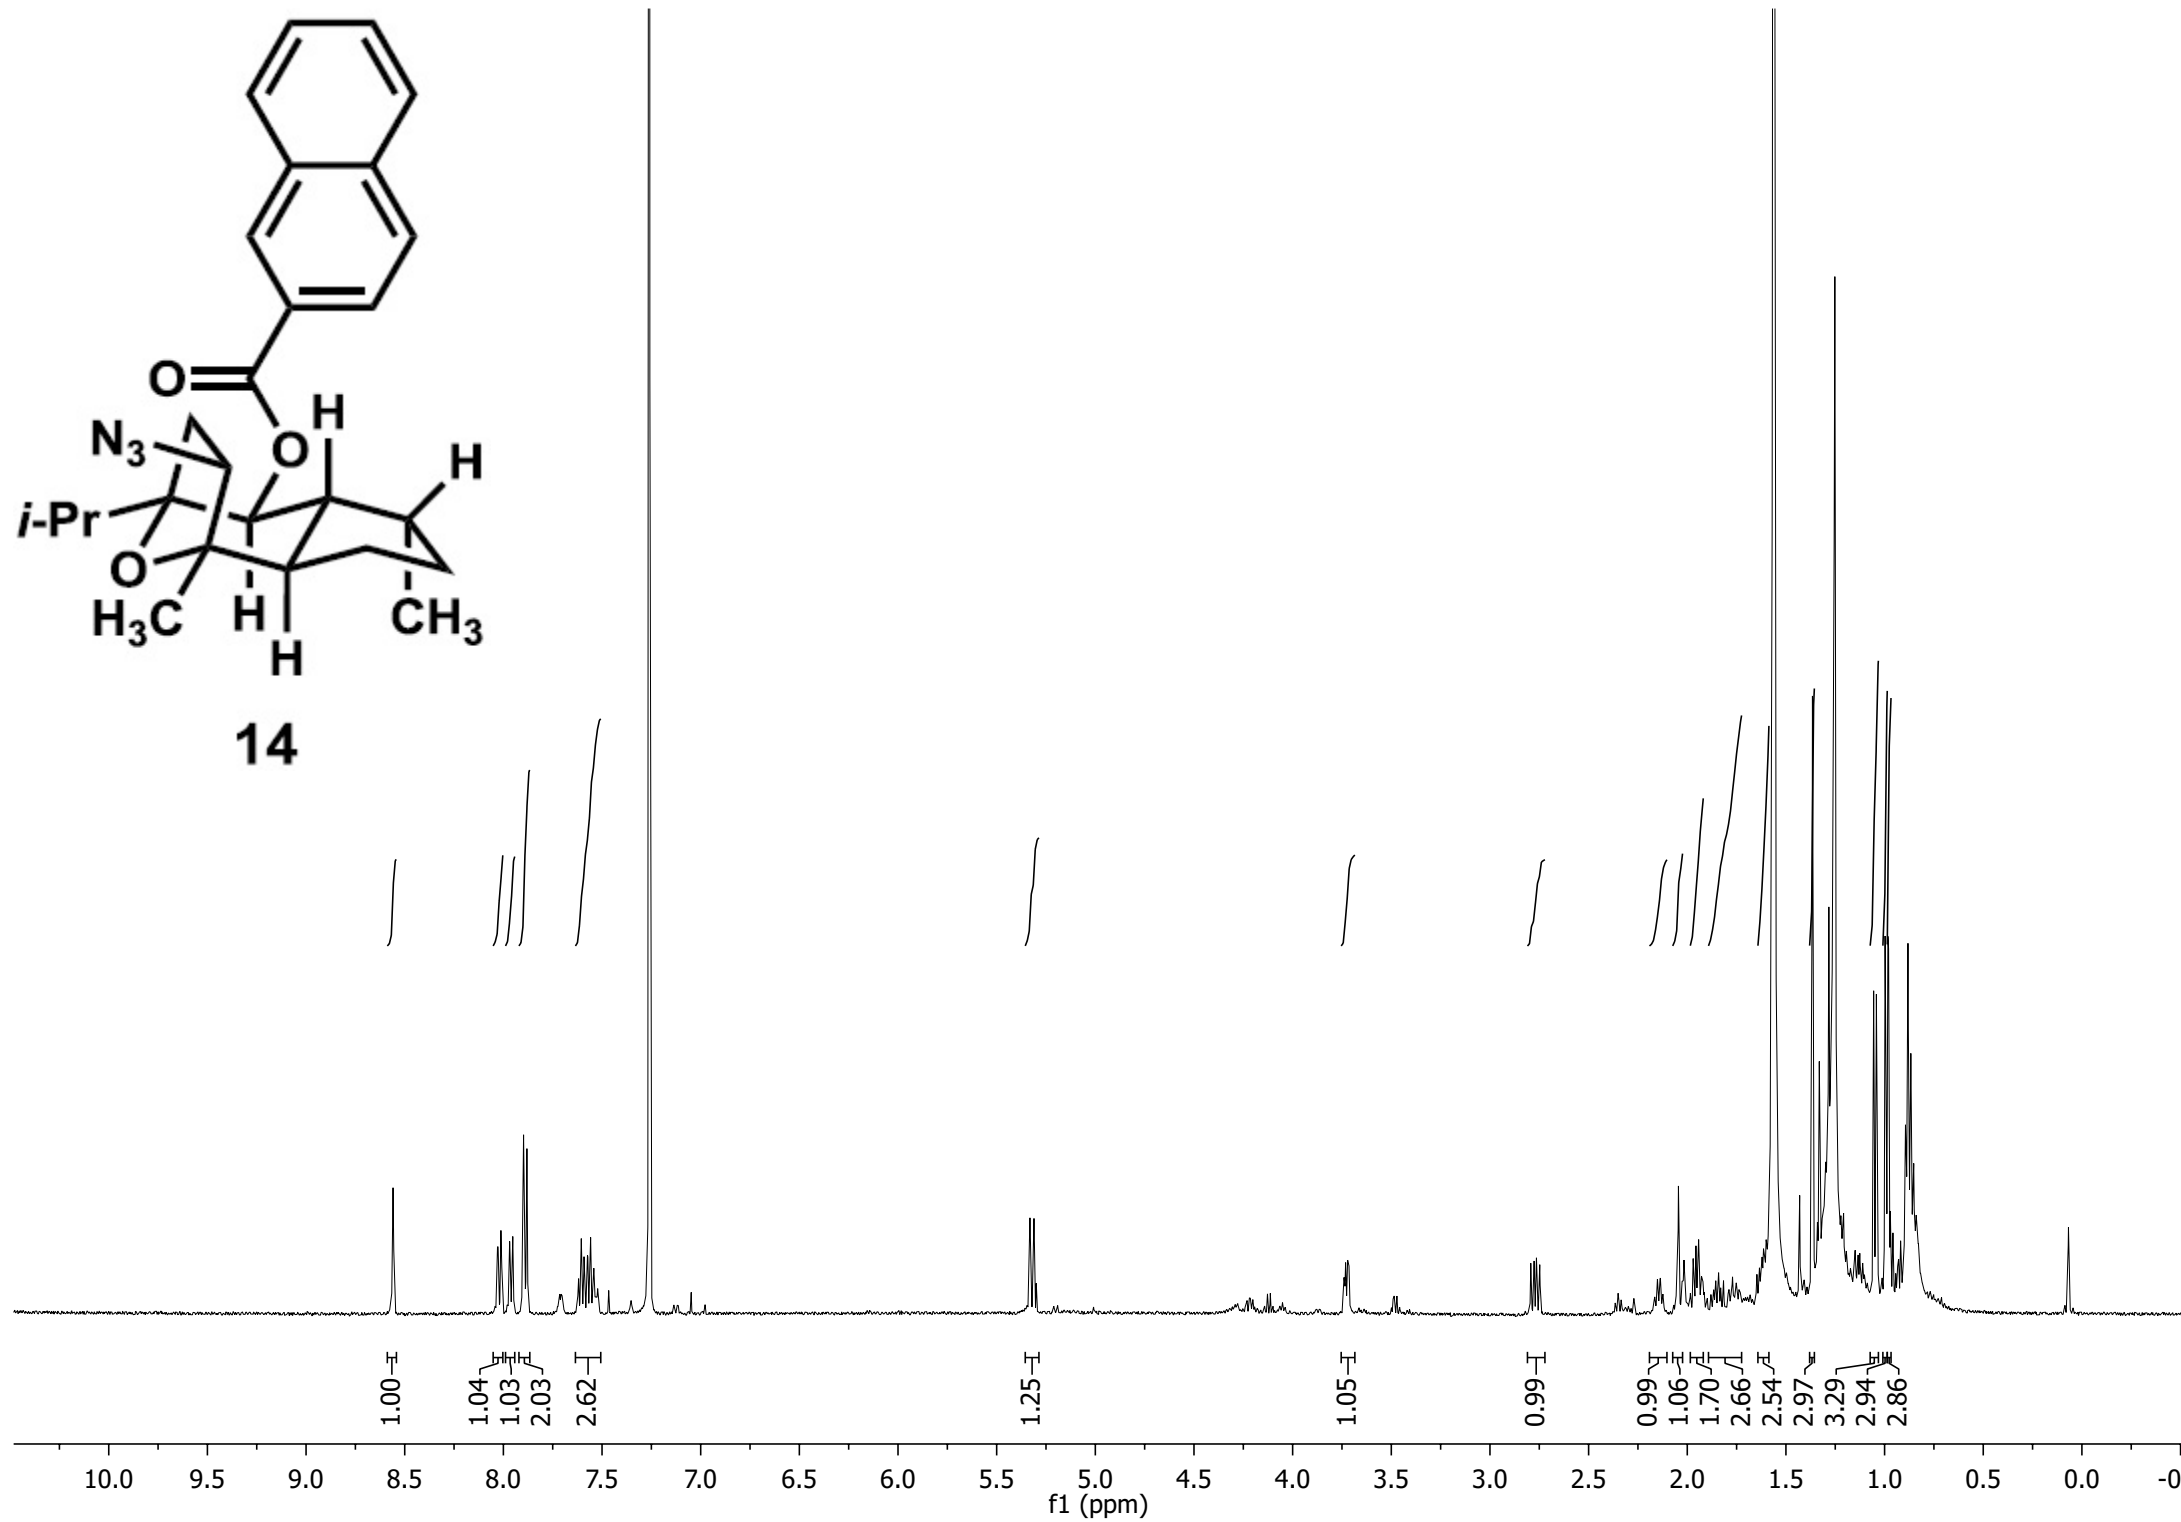

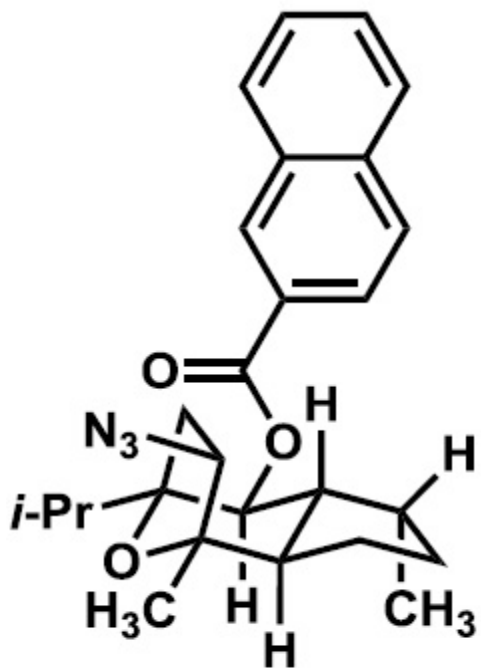

14

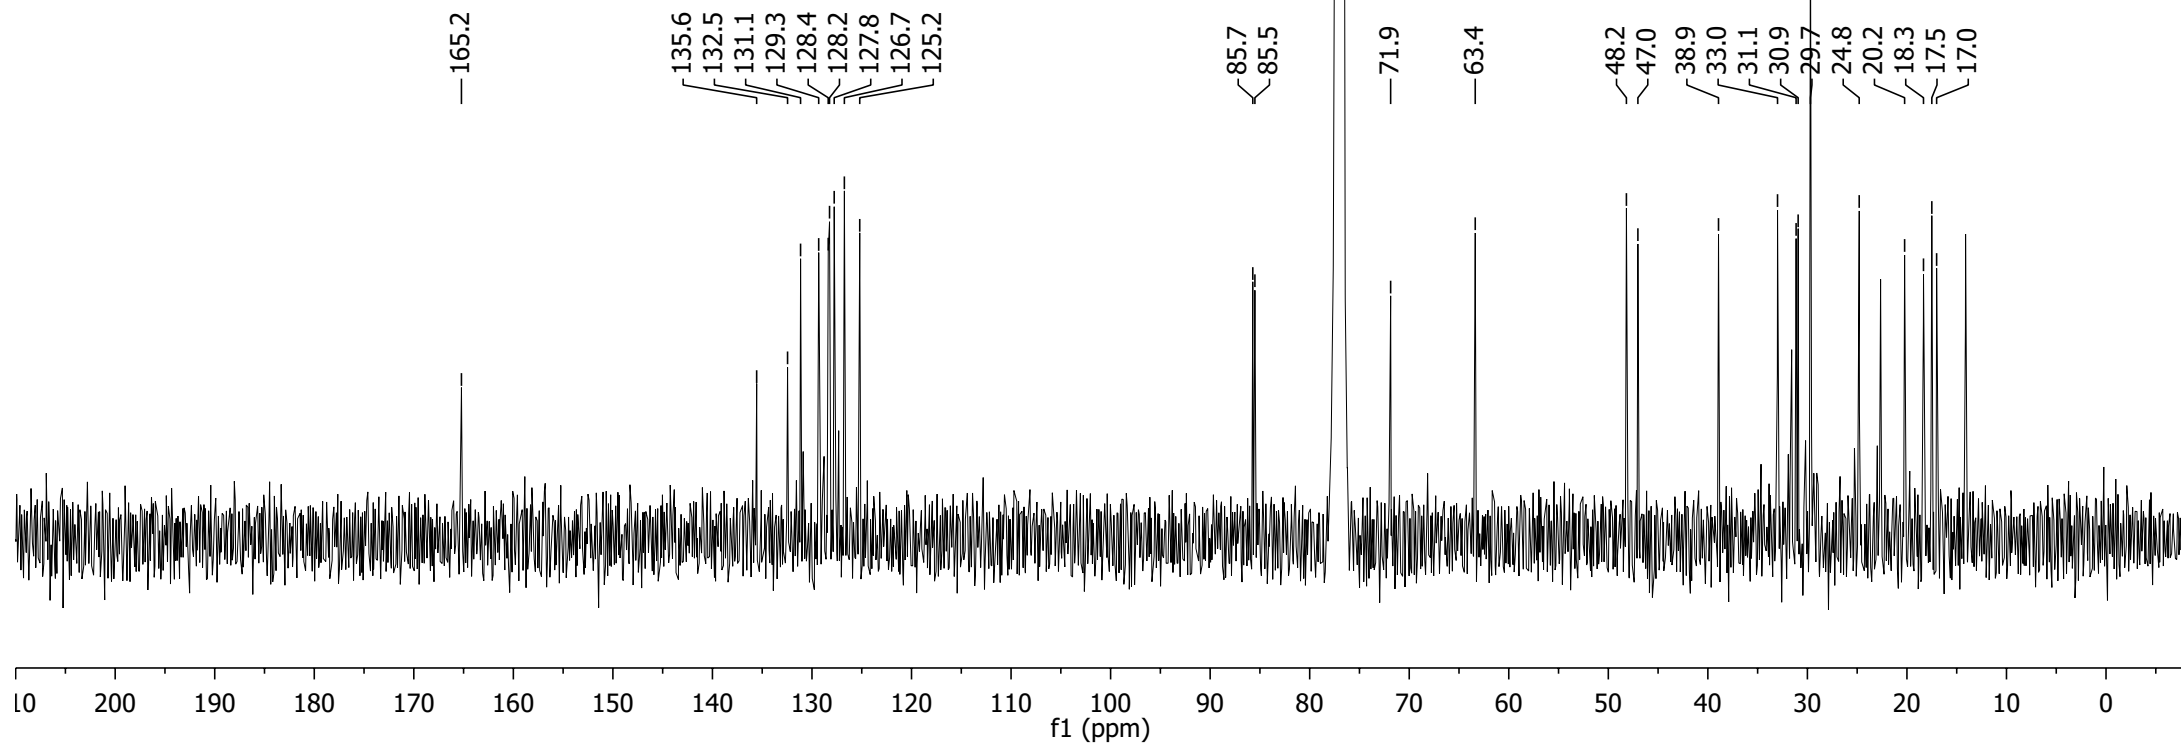

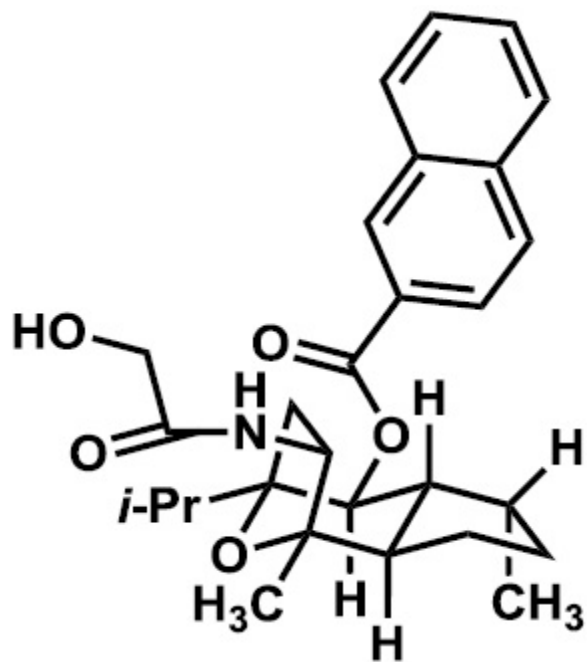

**17**  
**(NSC#764081)**

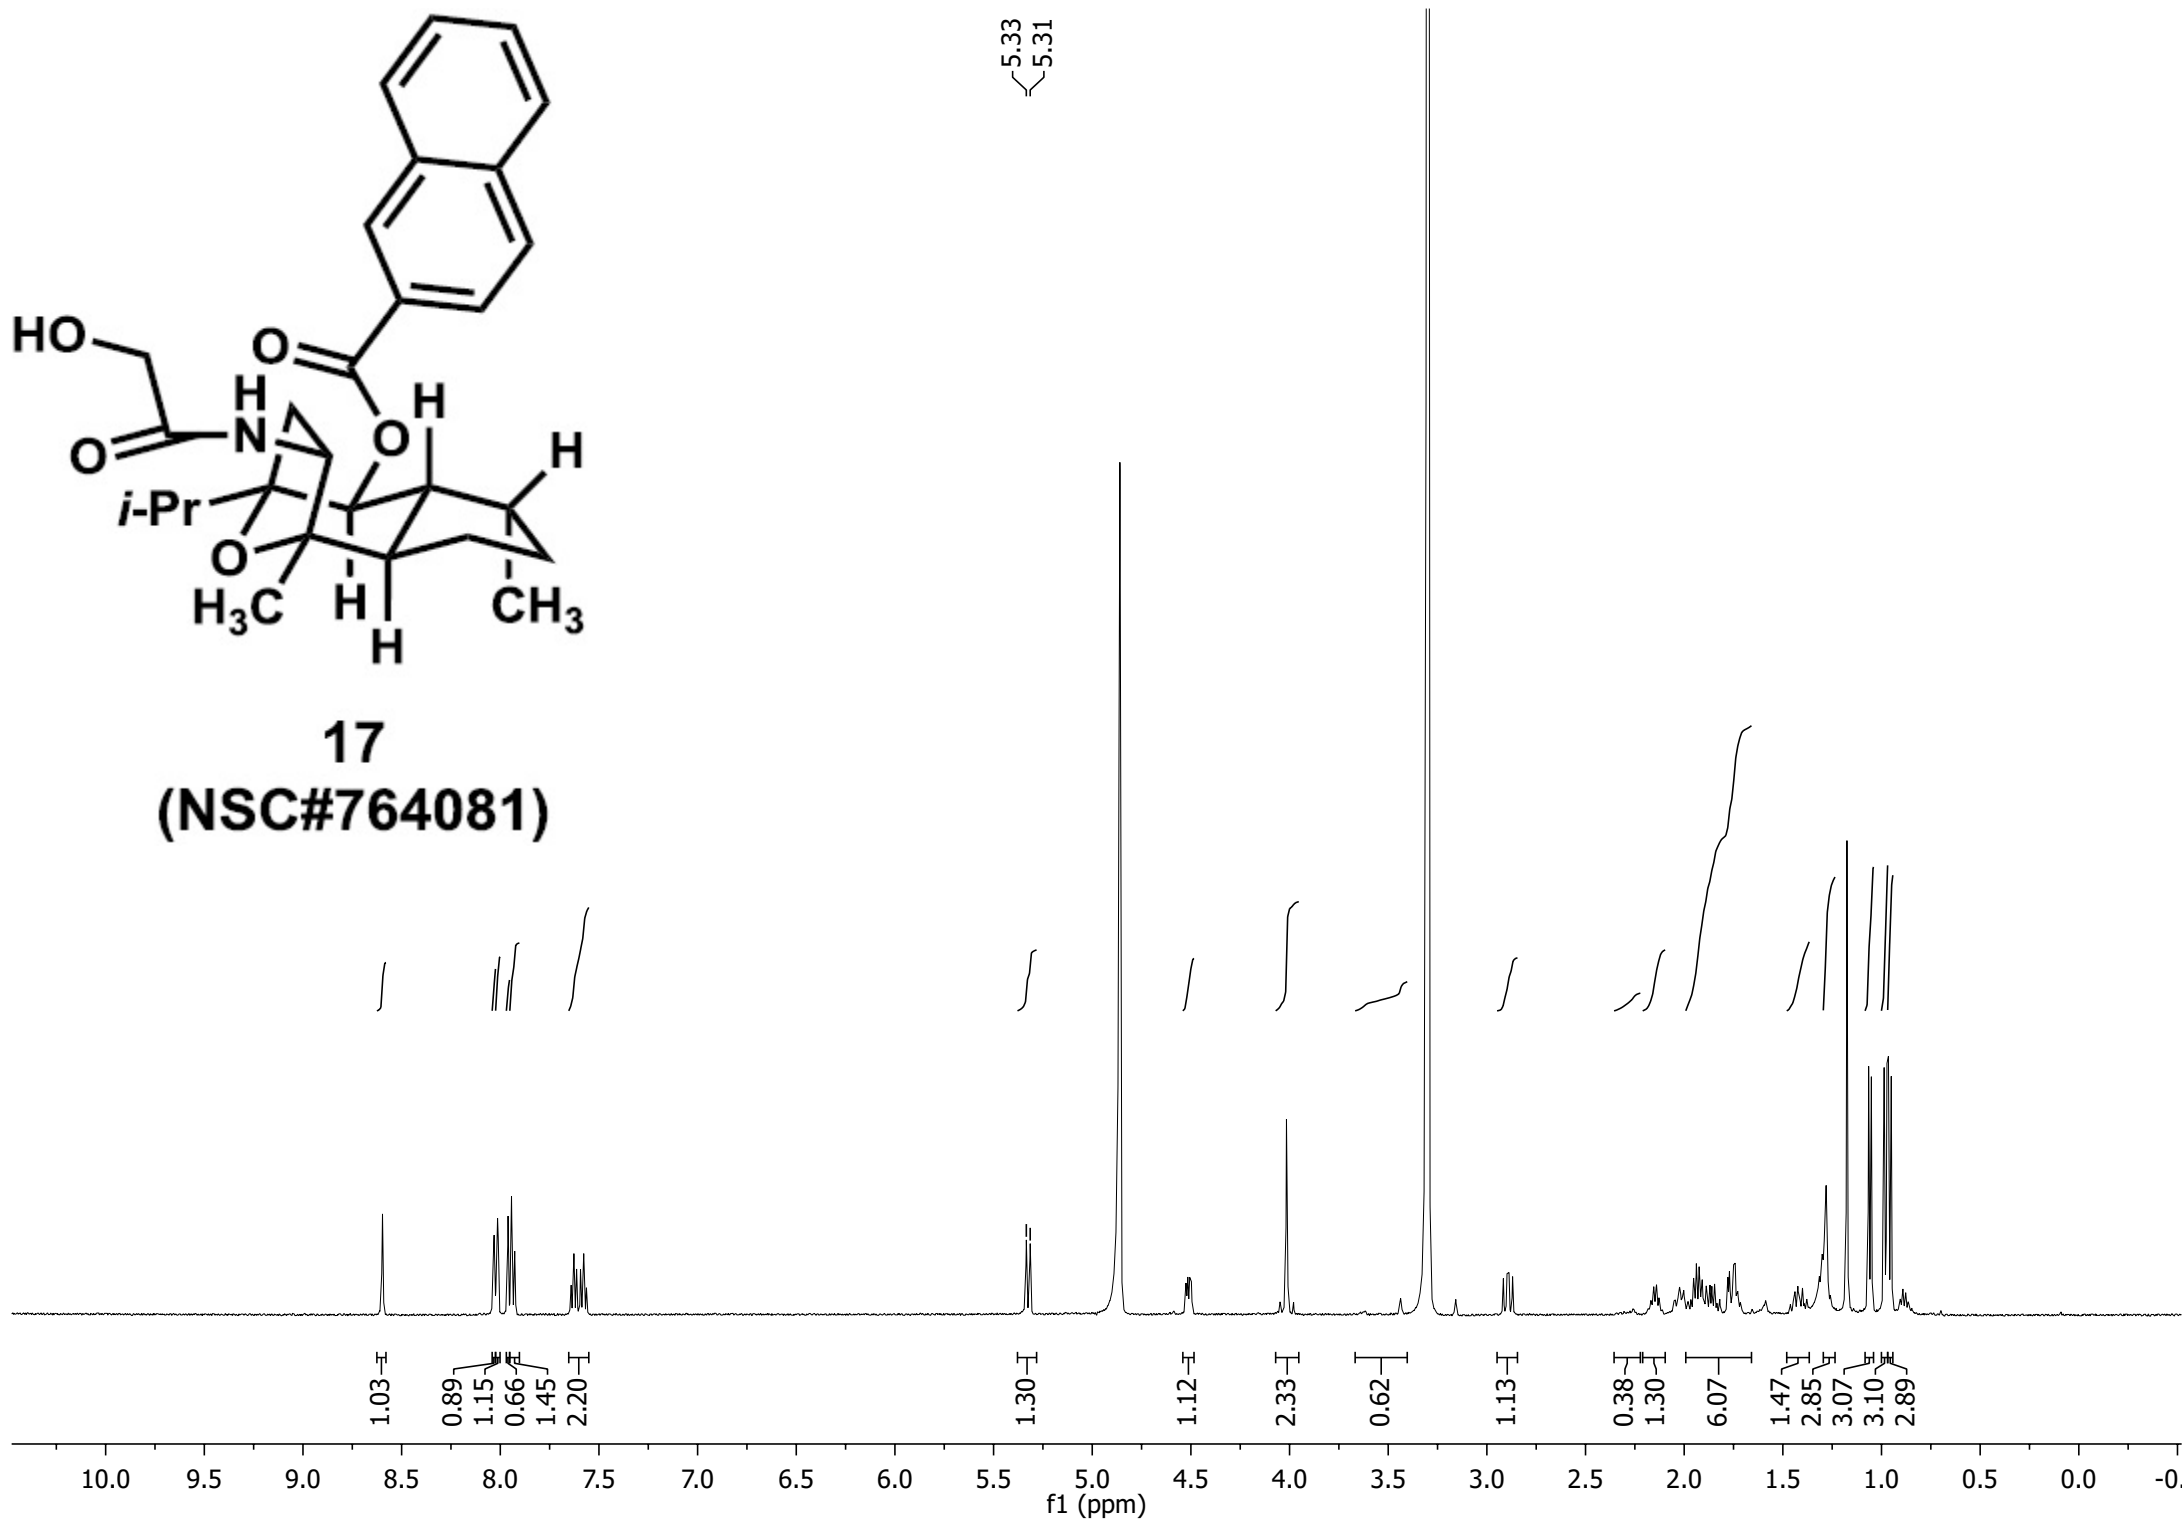



**17**  
**(NSC#764081)**

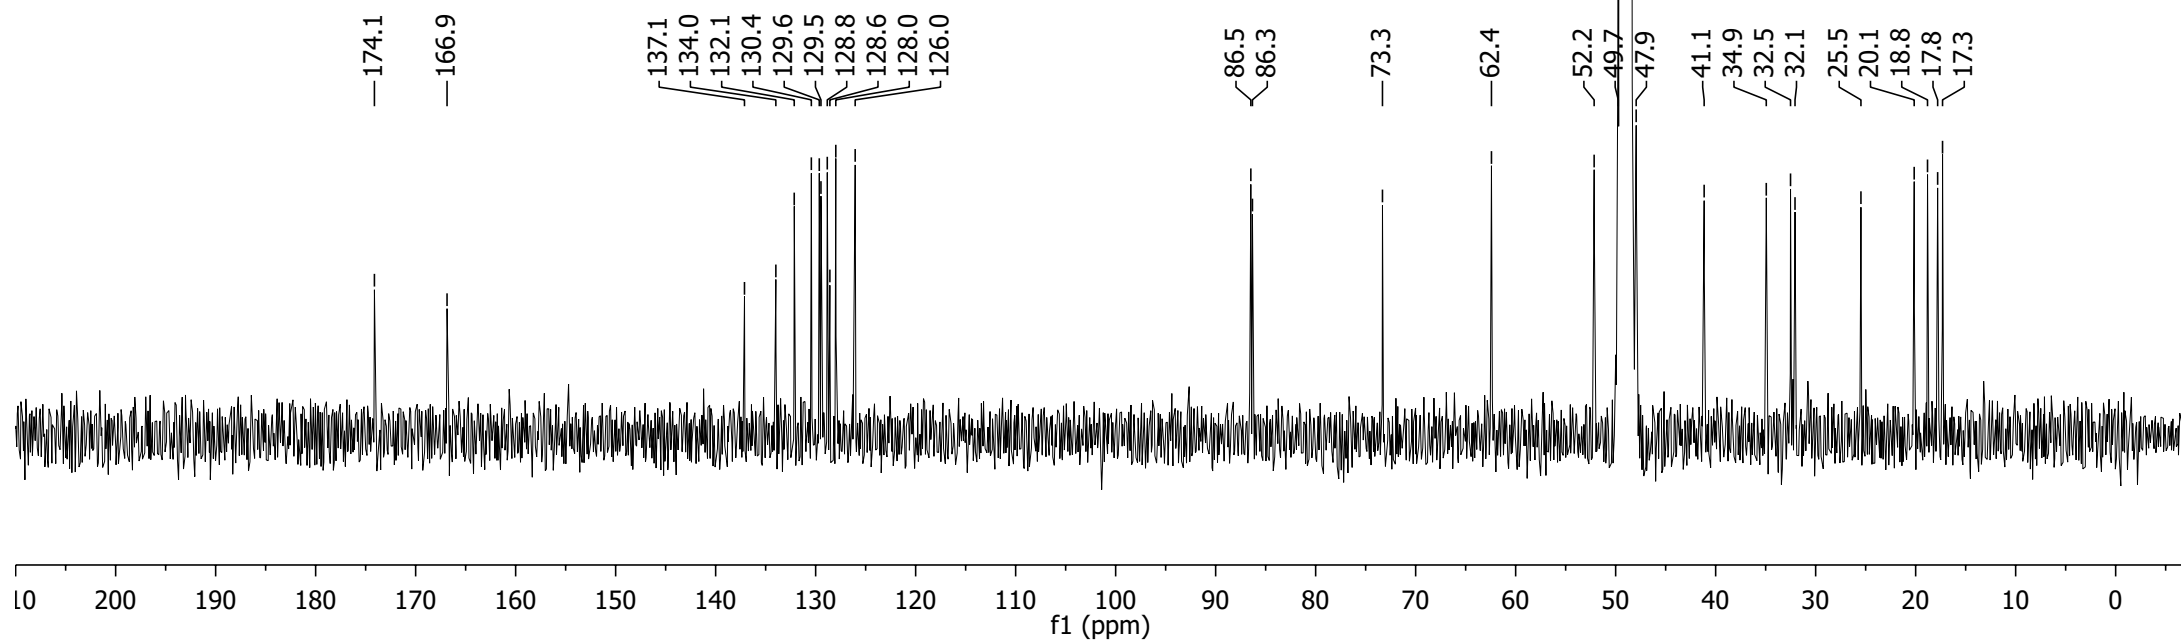

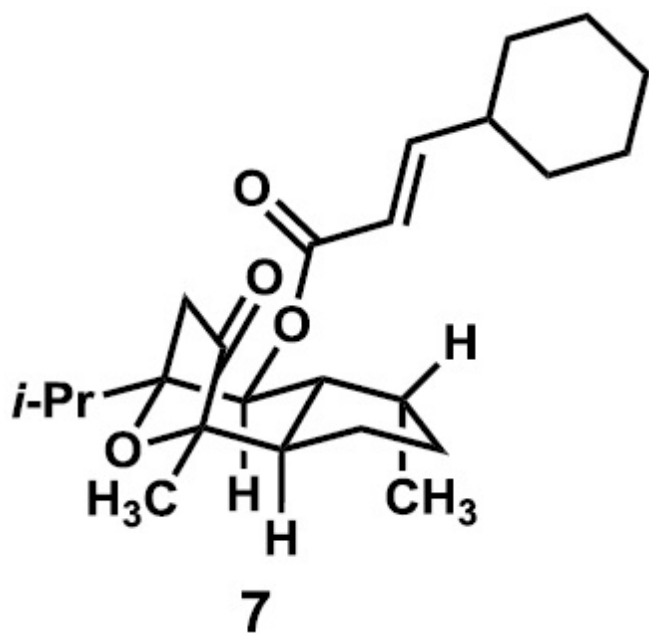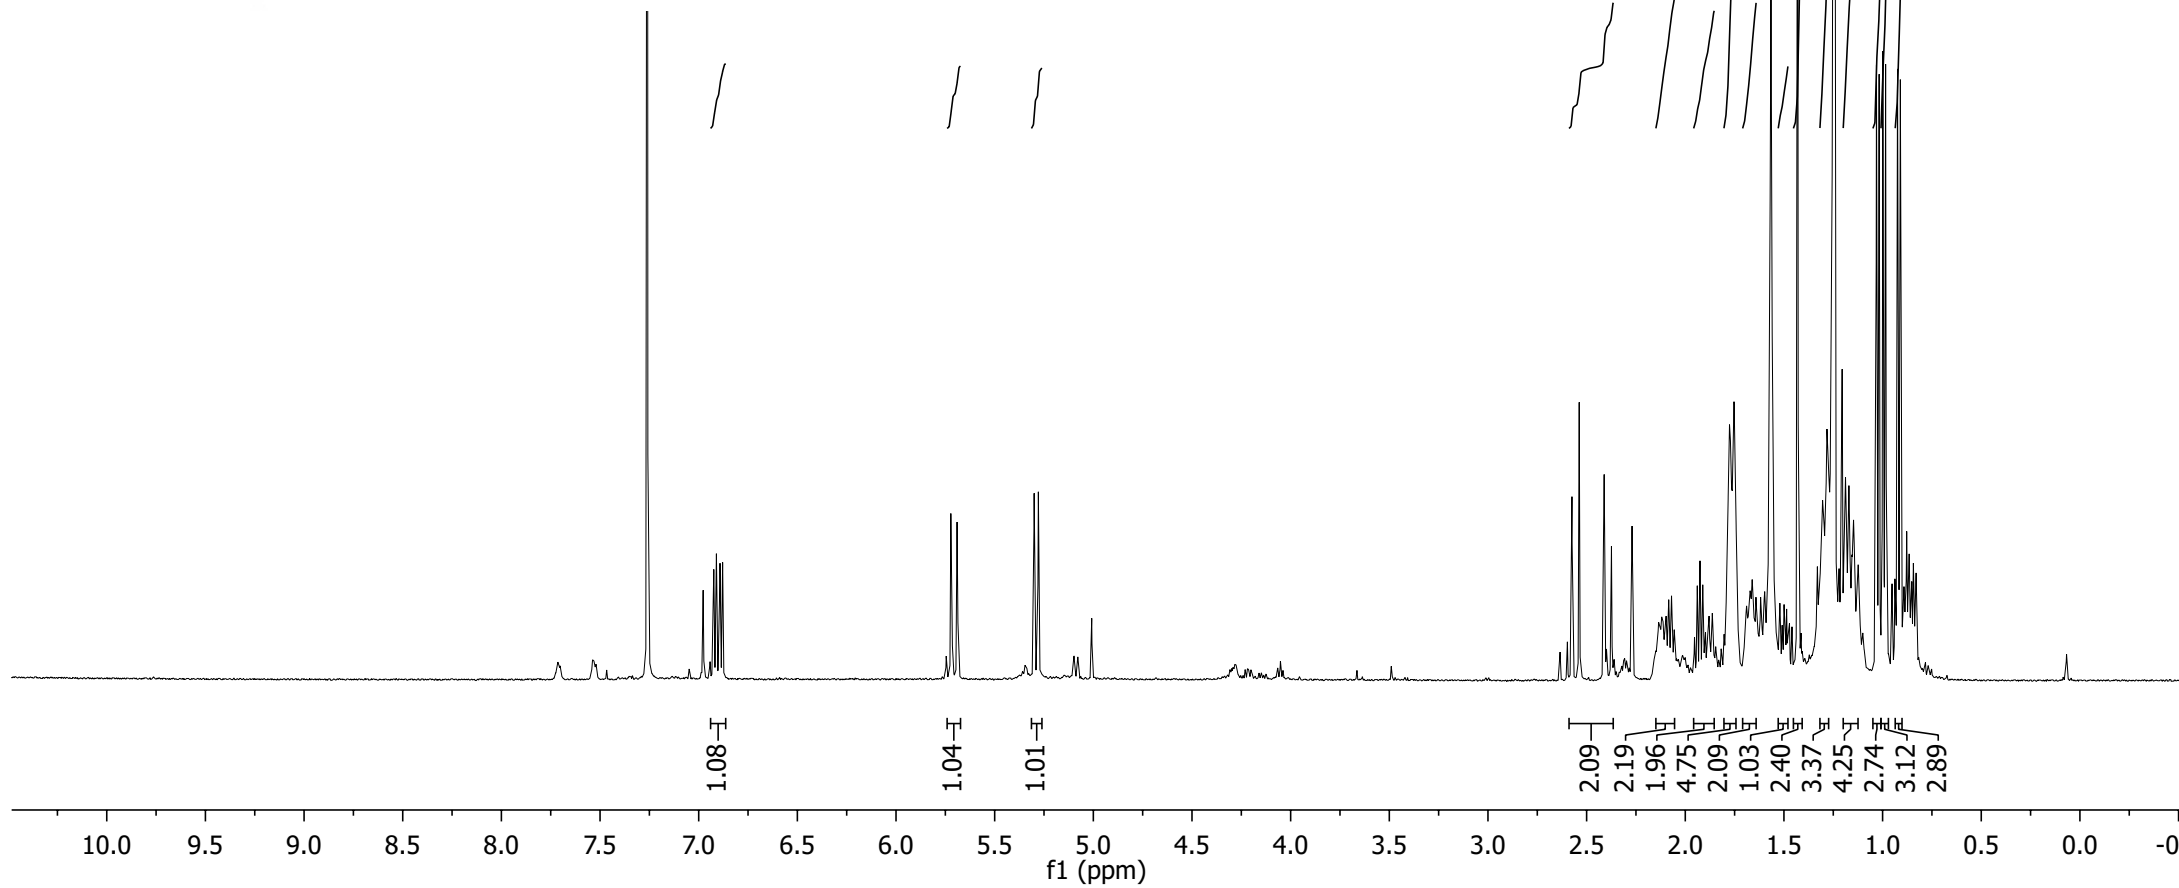

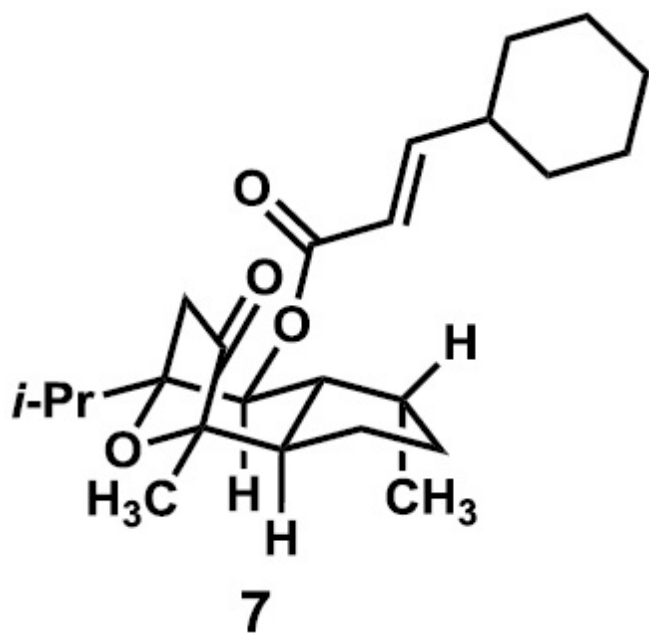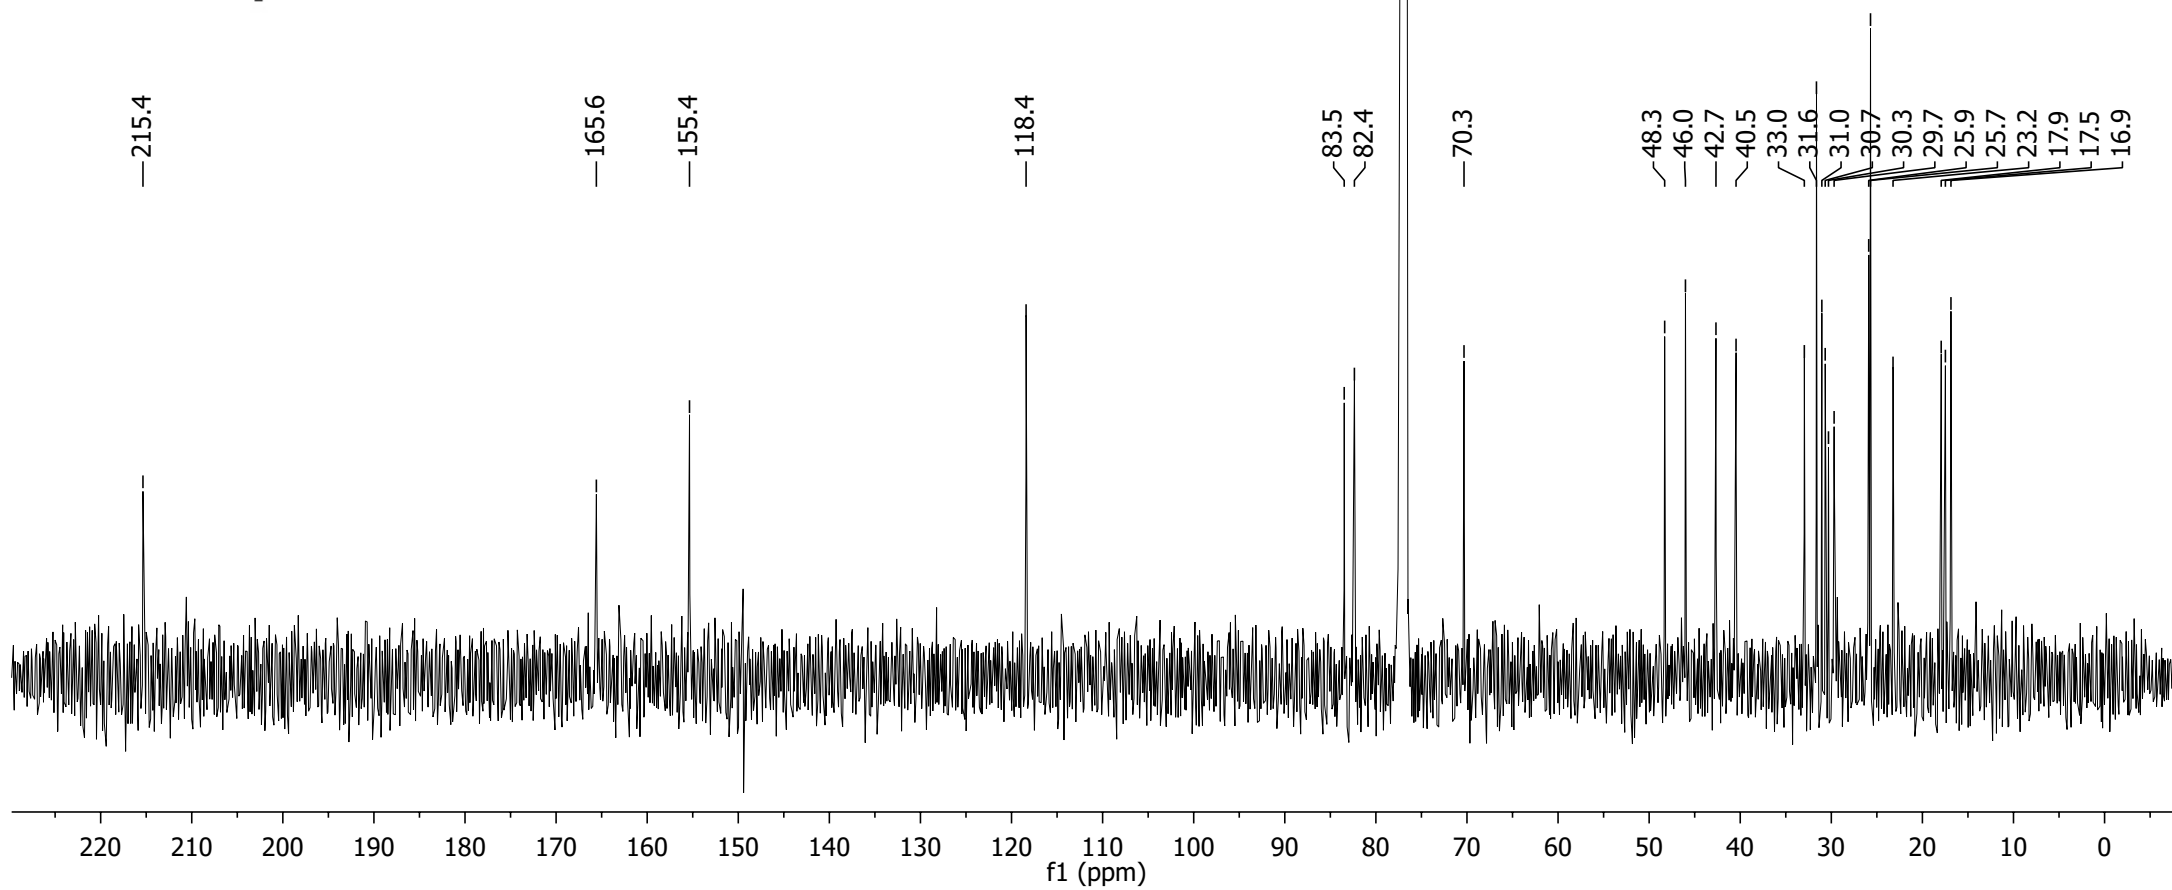

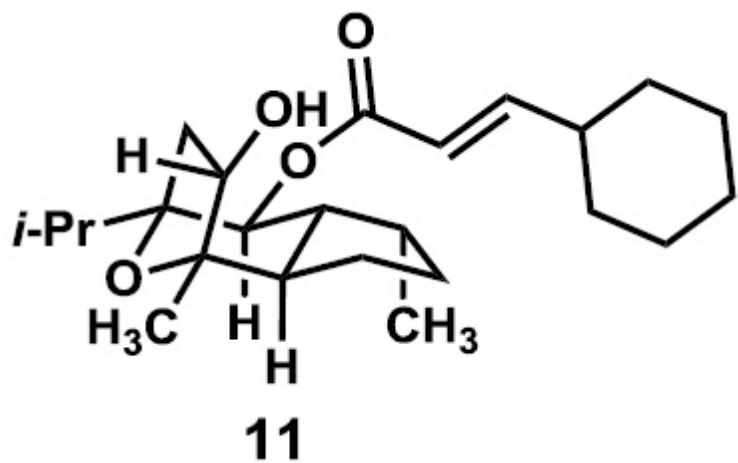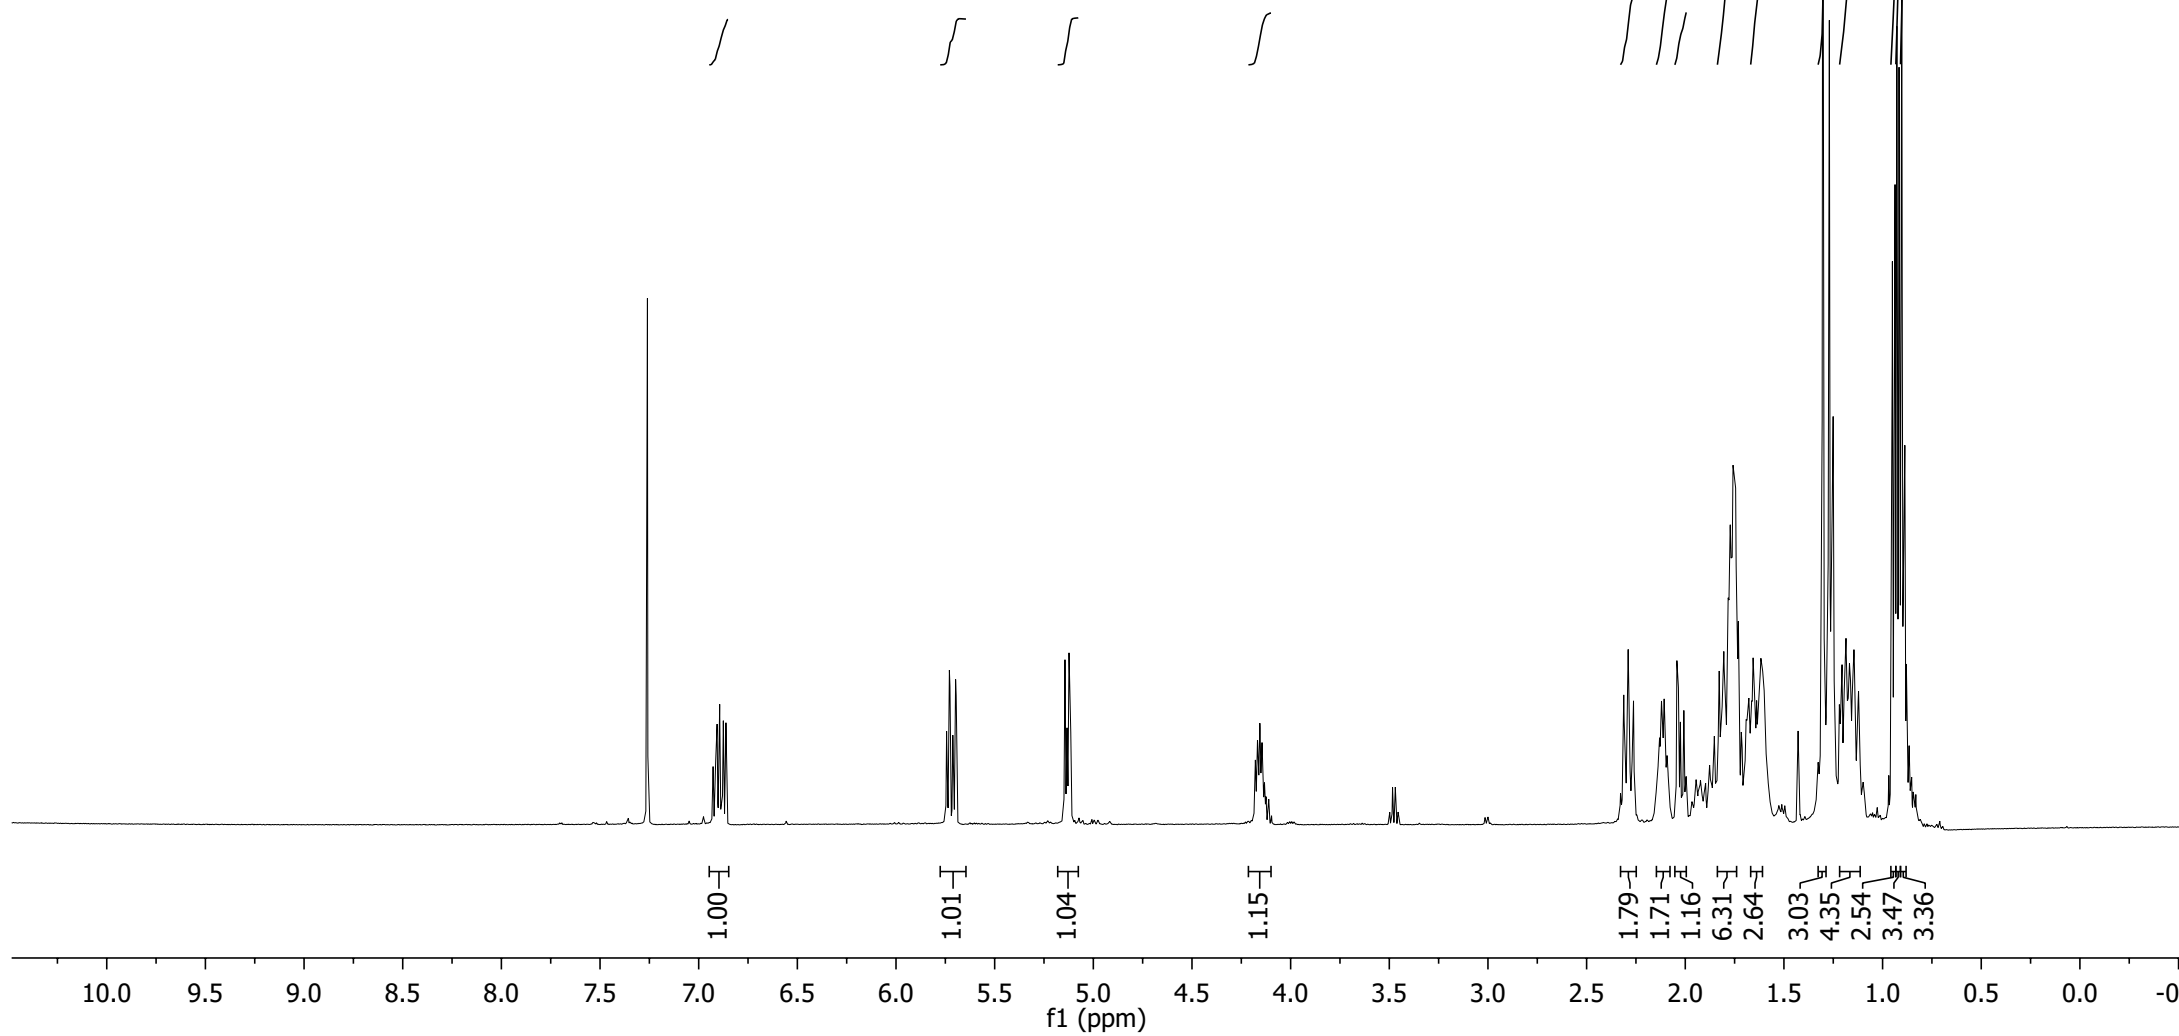

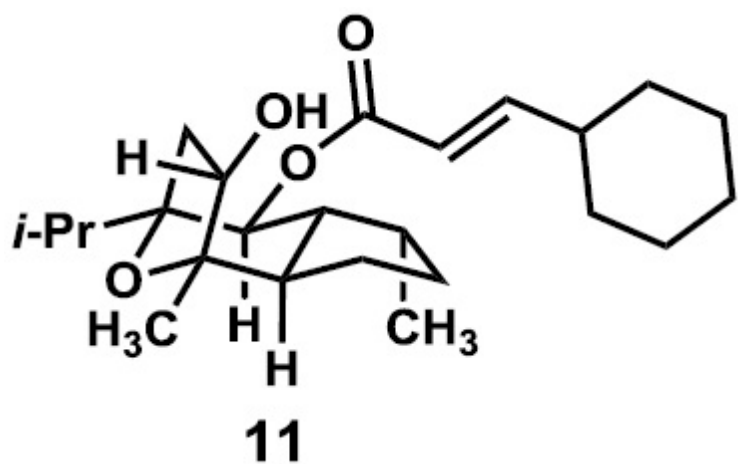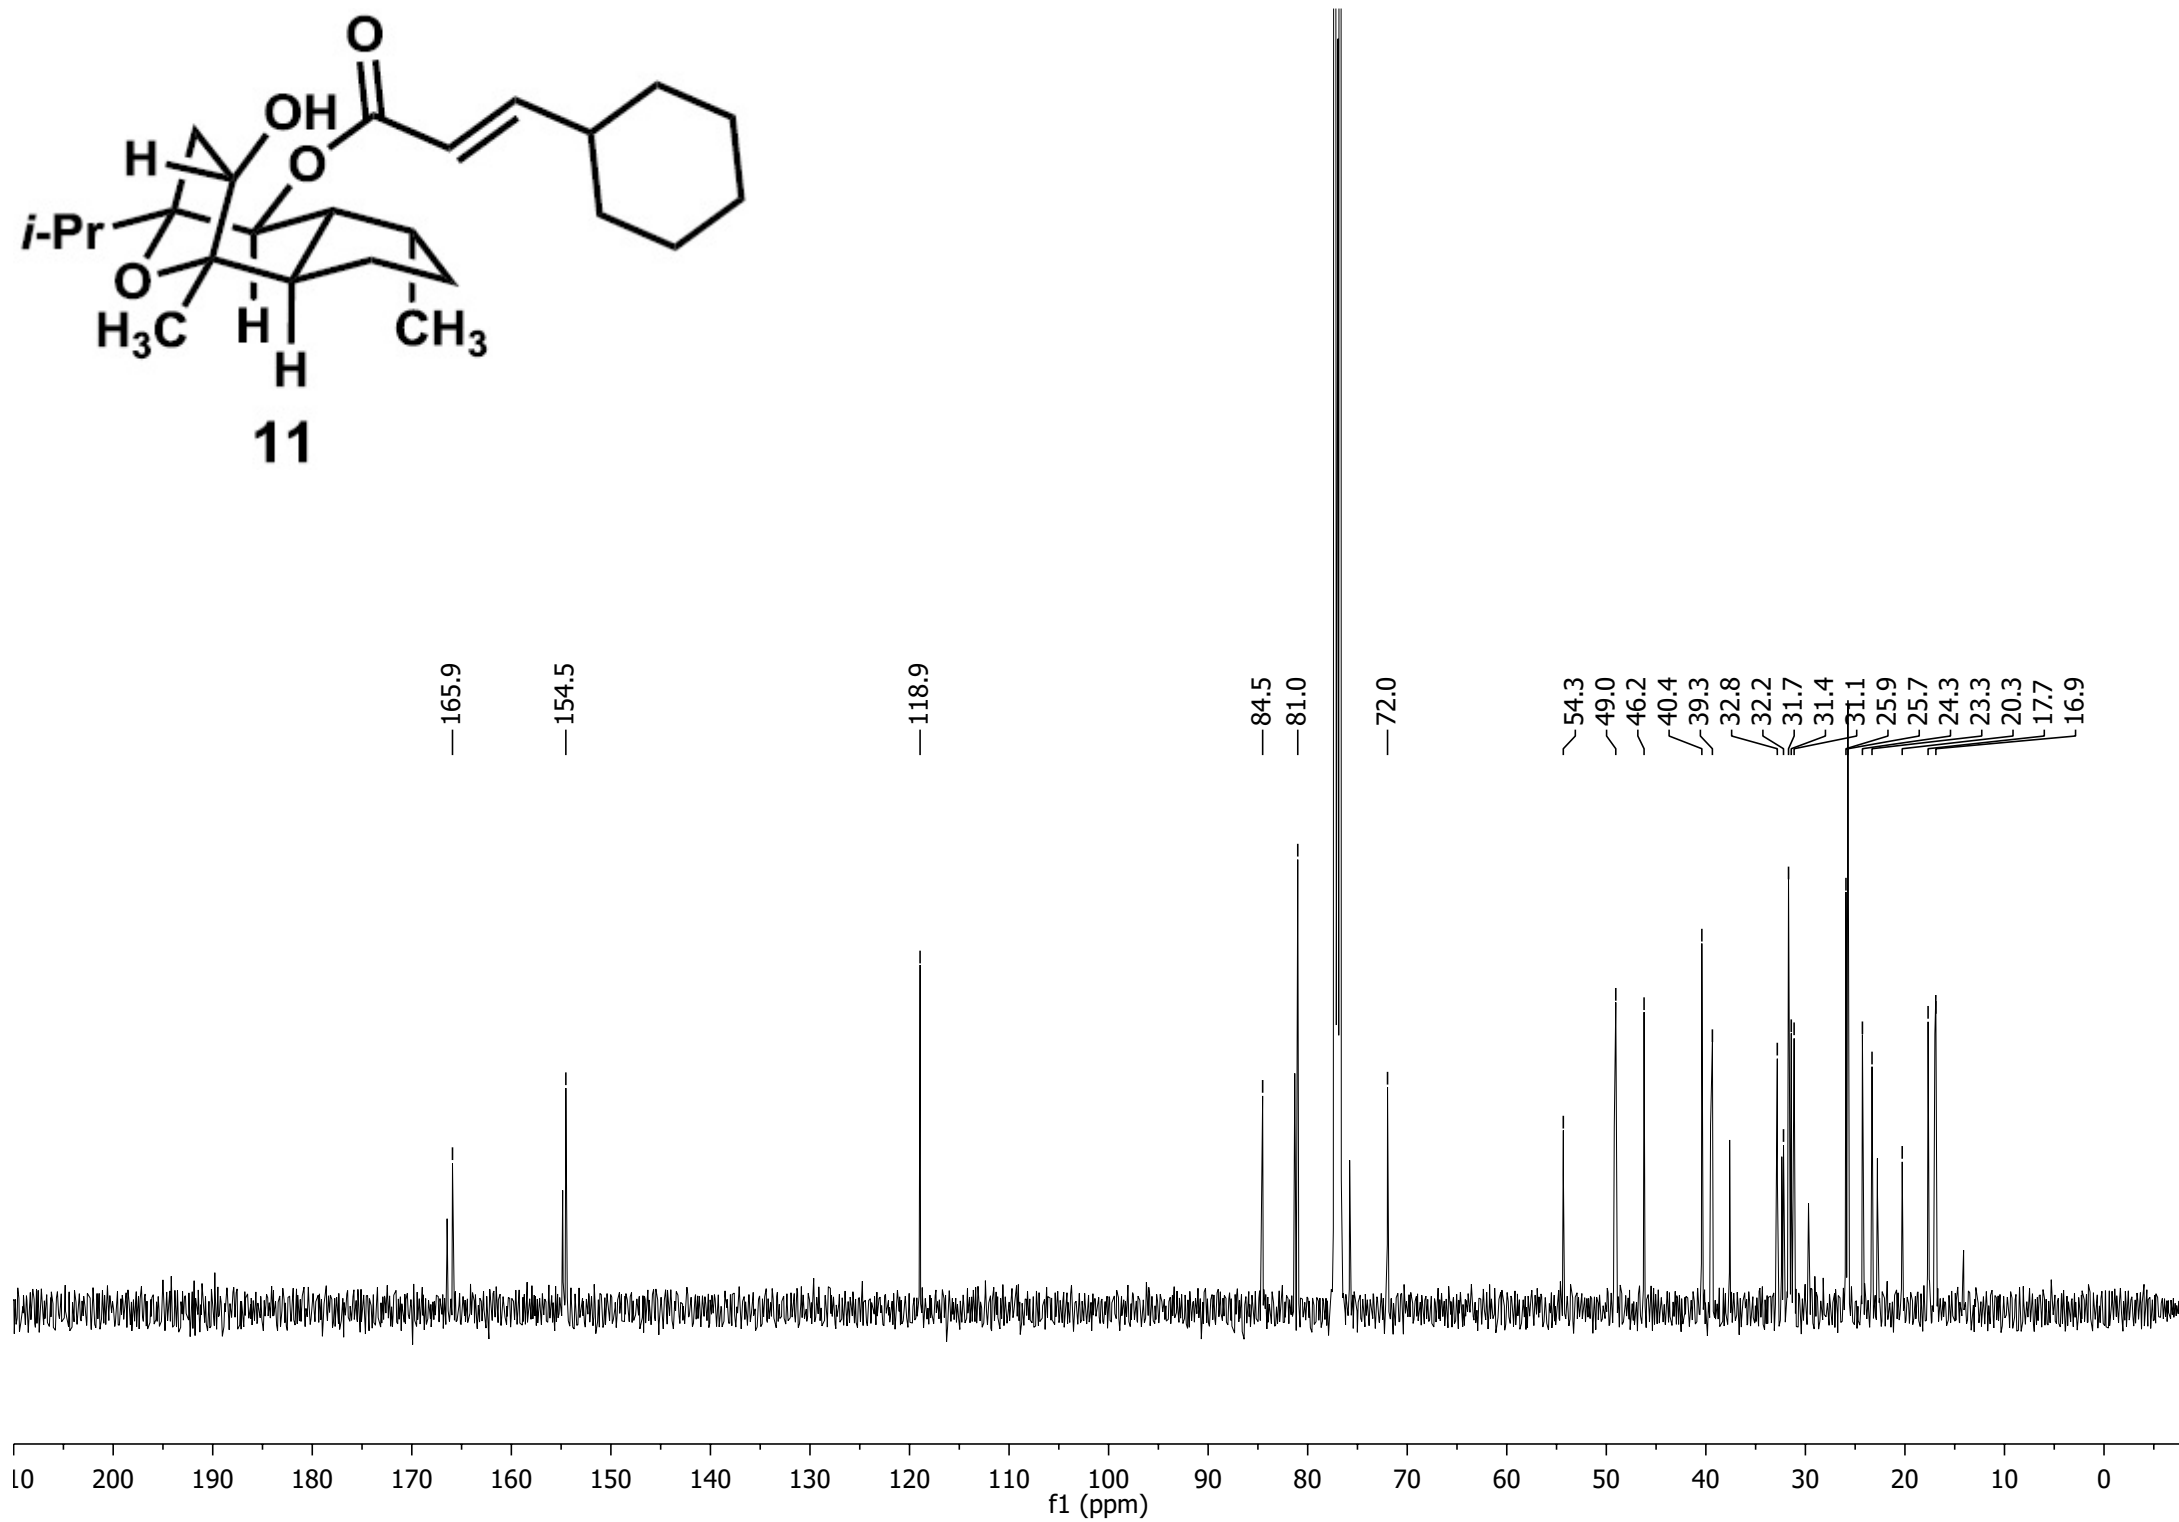

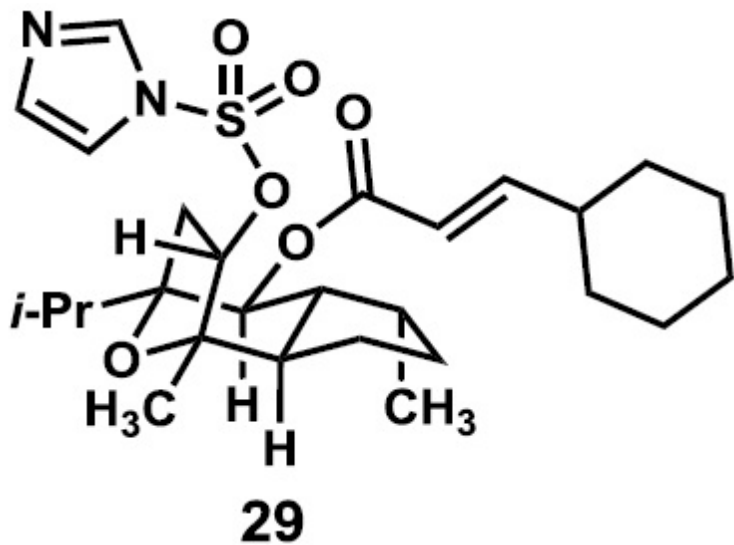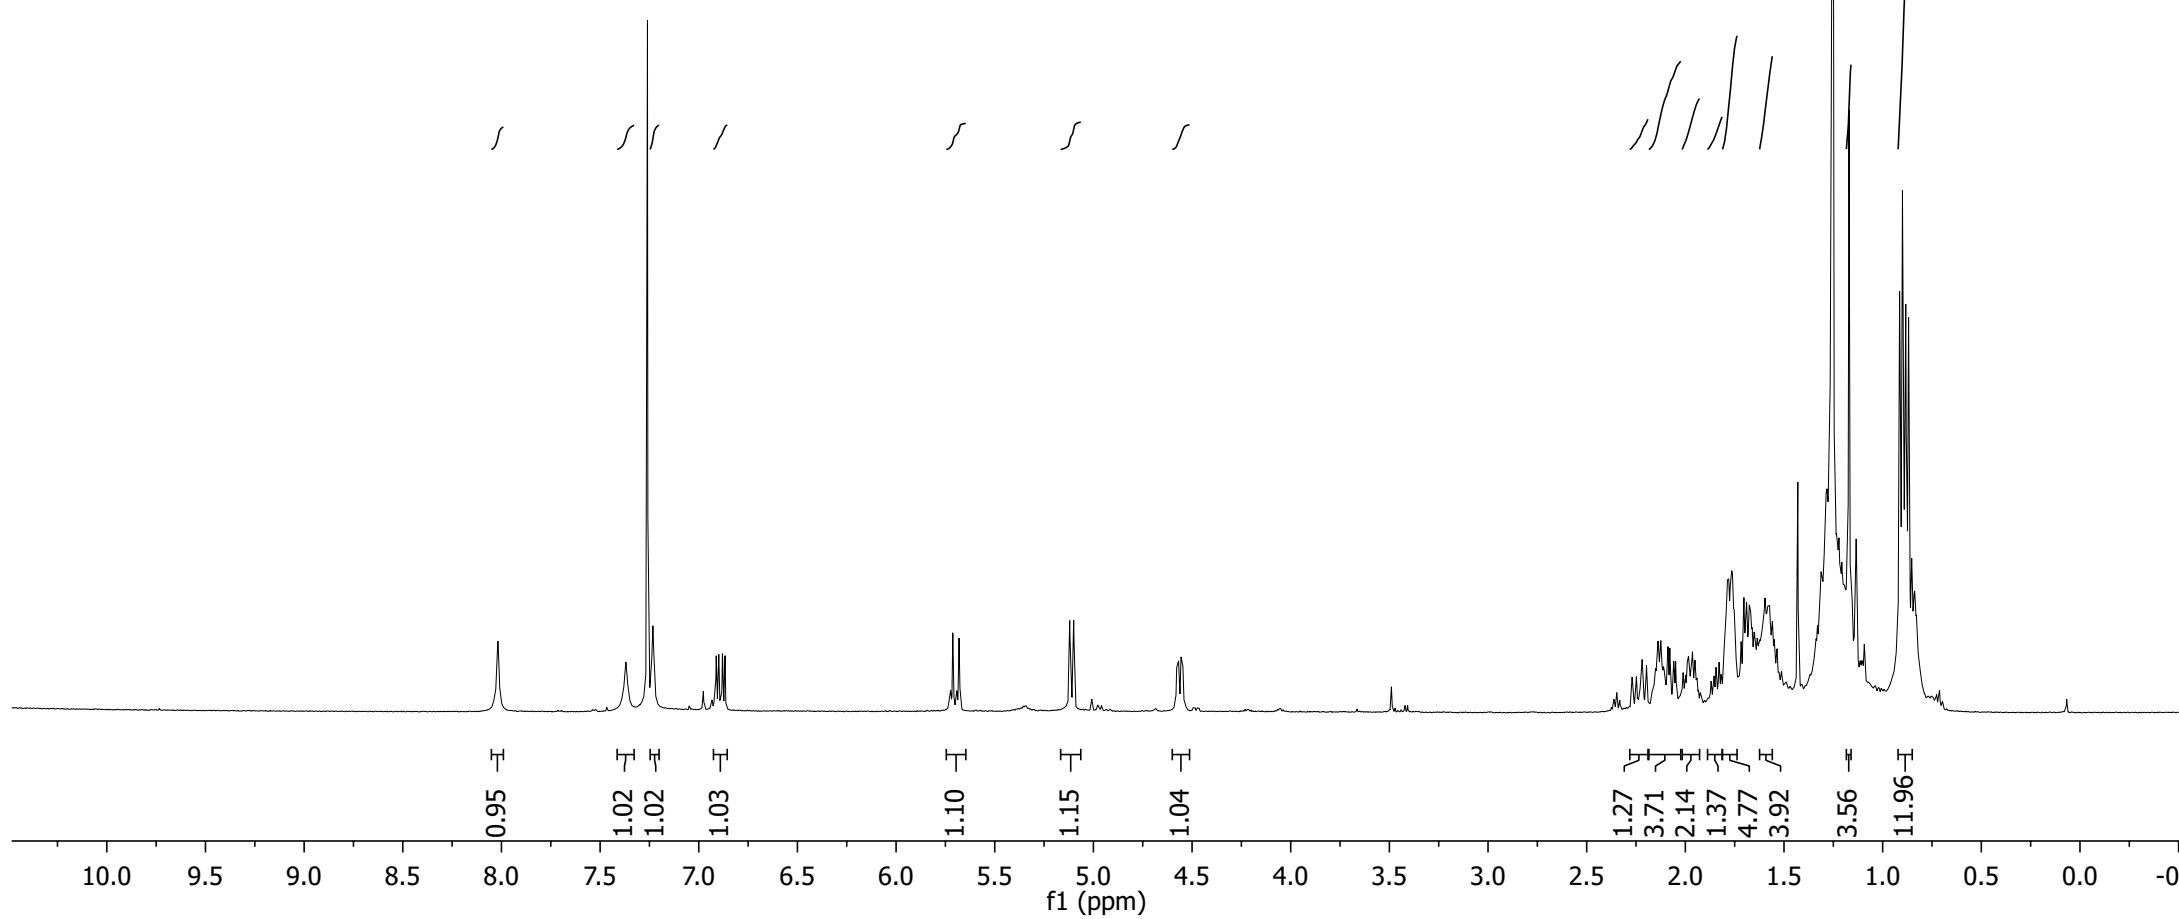

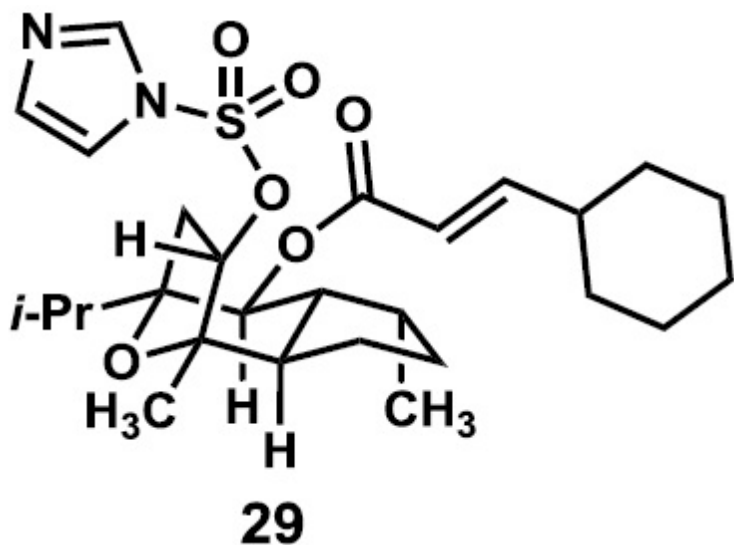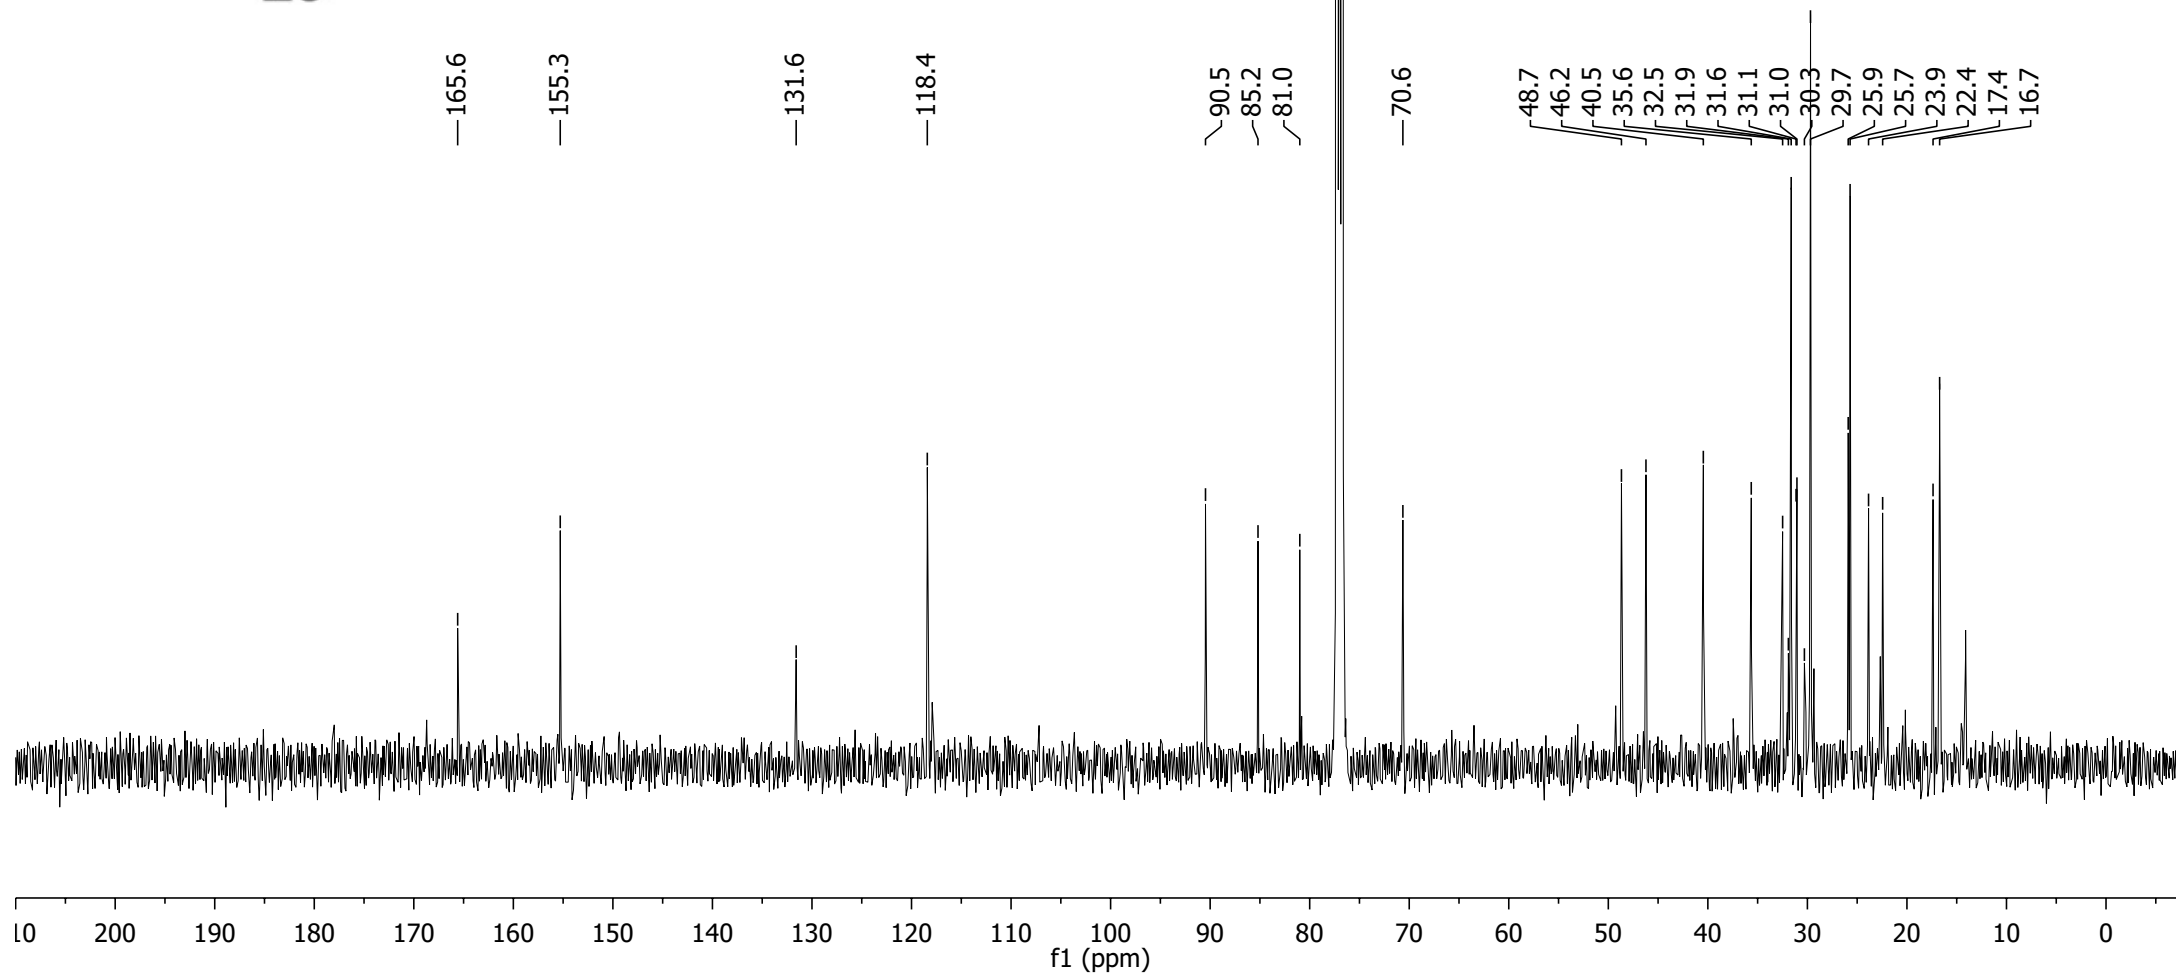

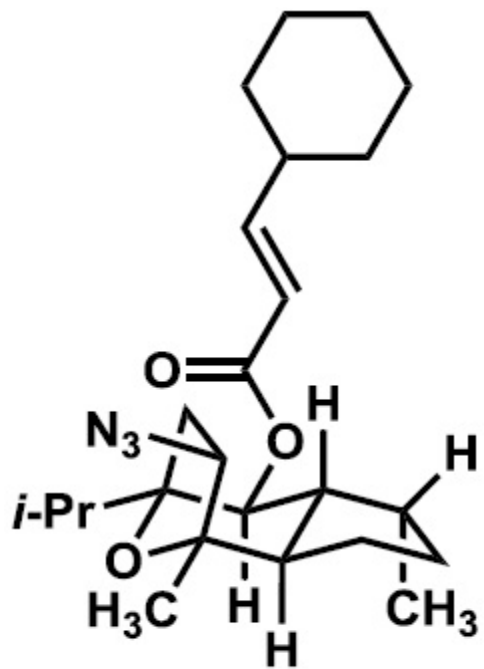

15

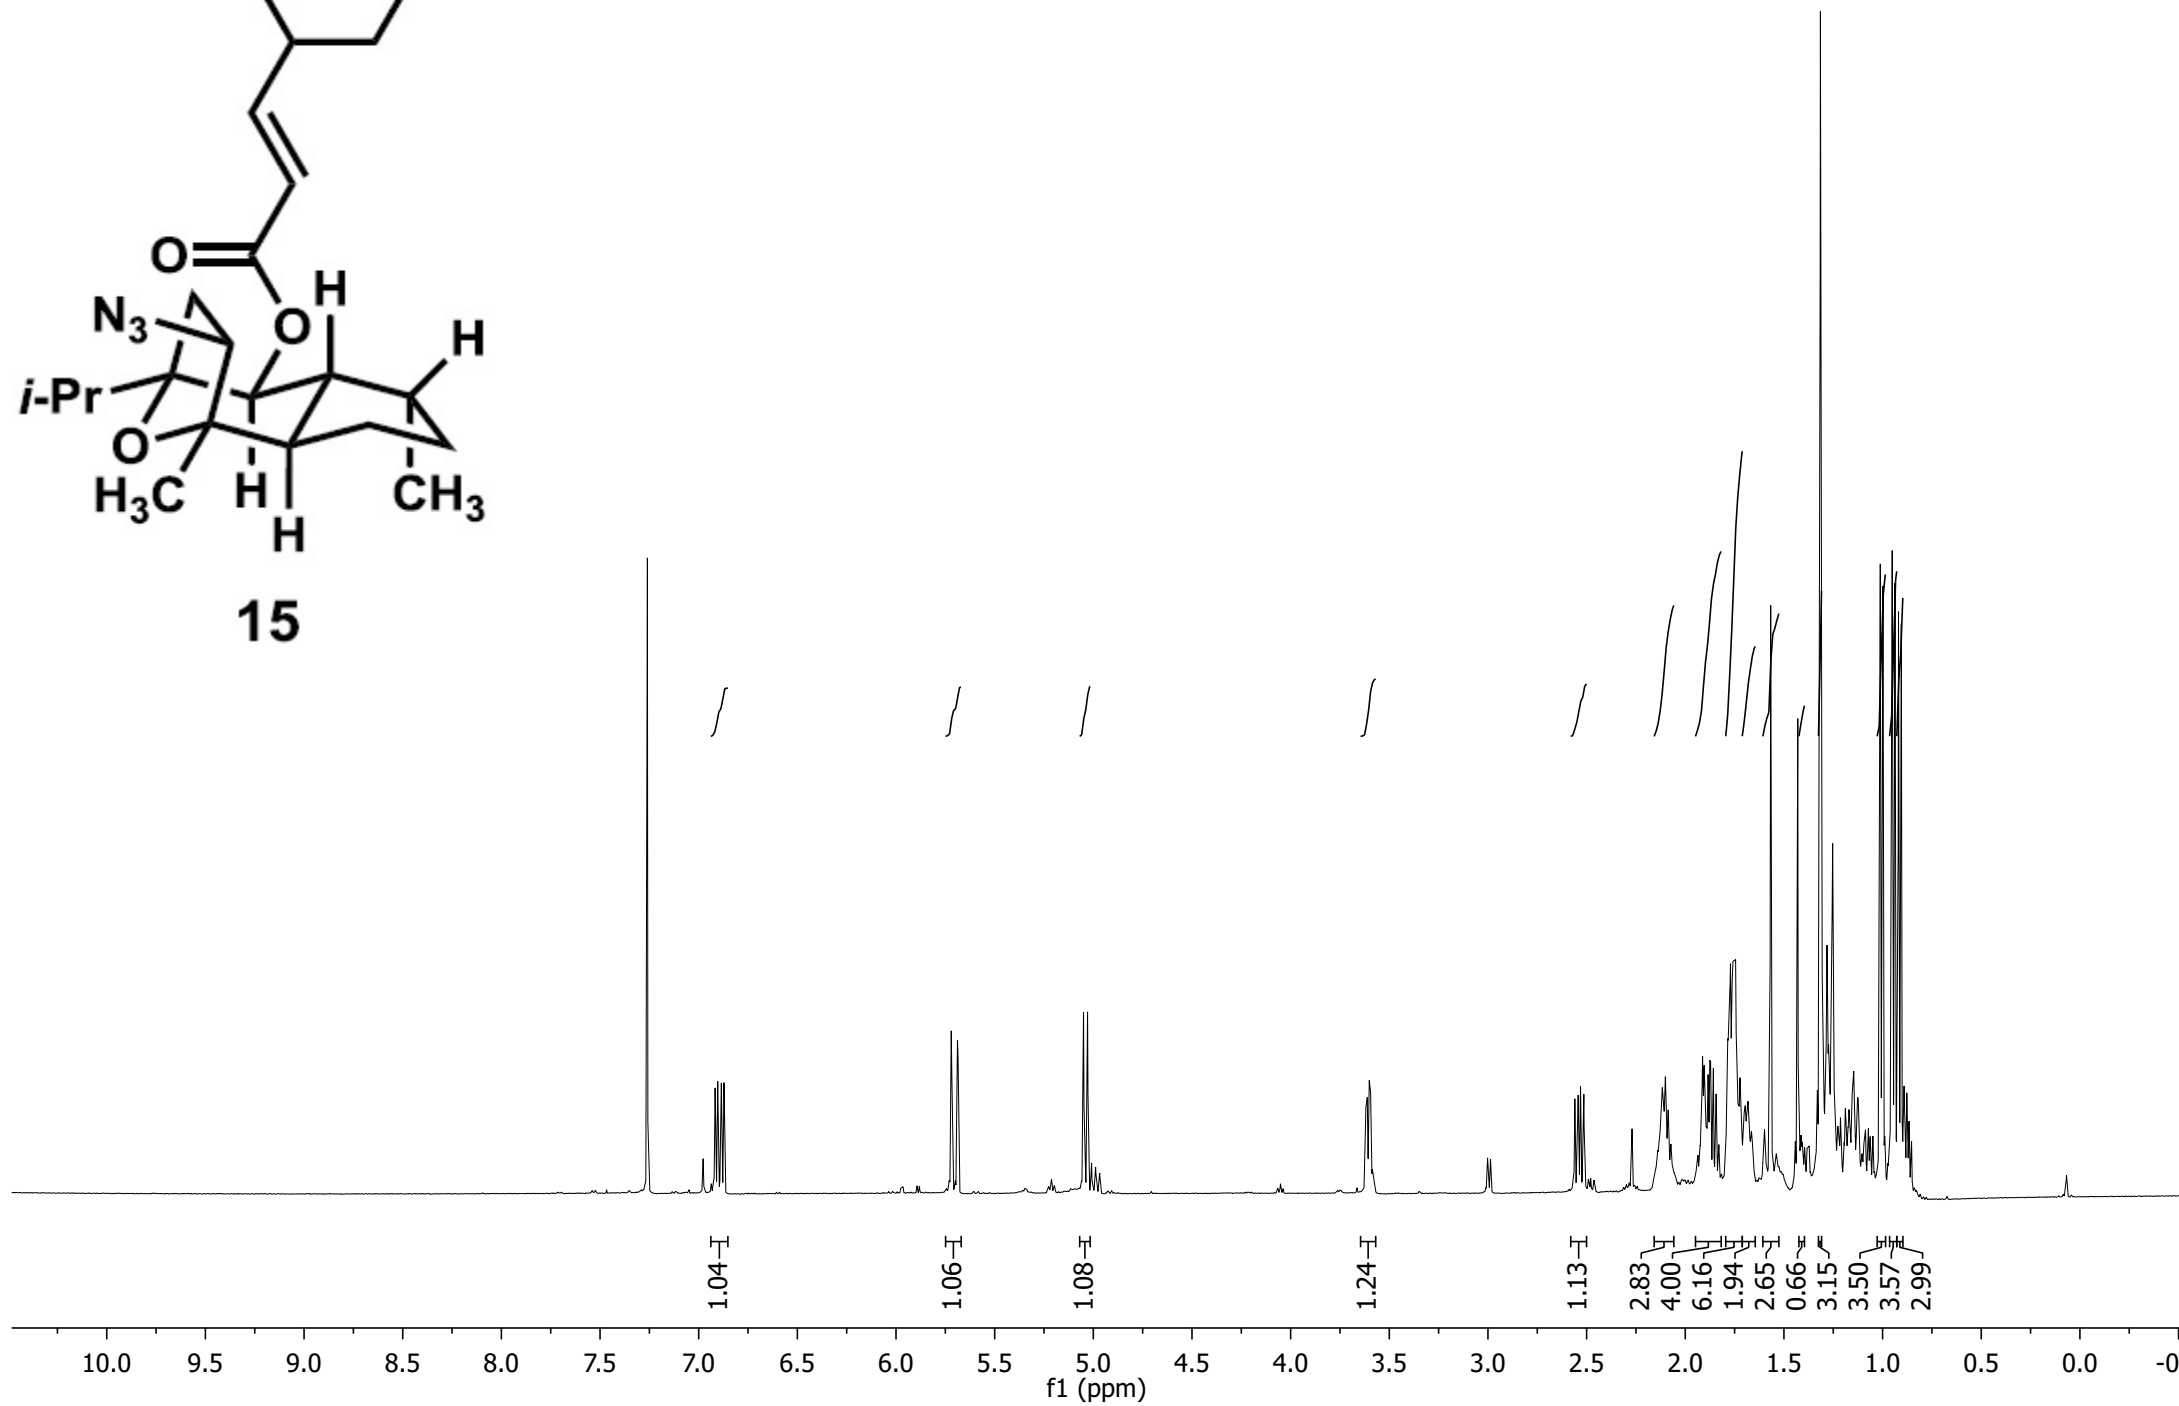



**15**

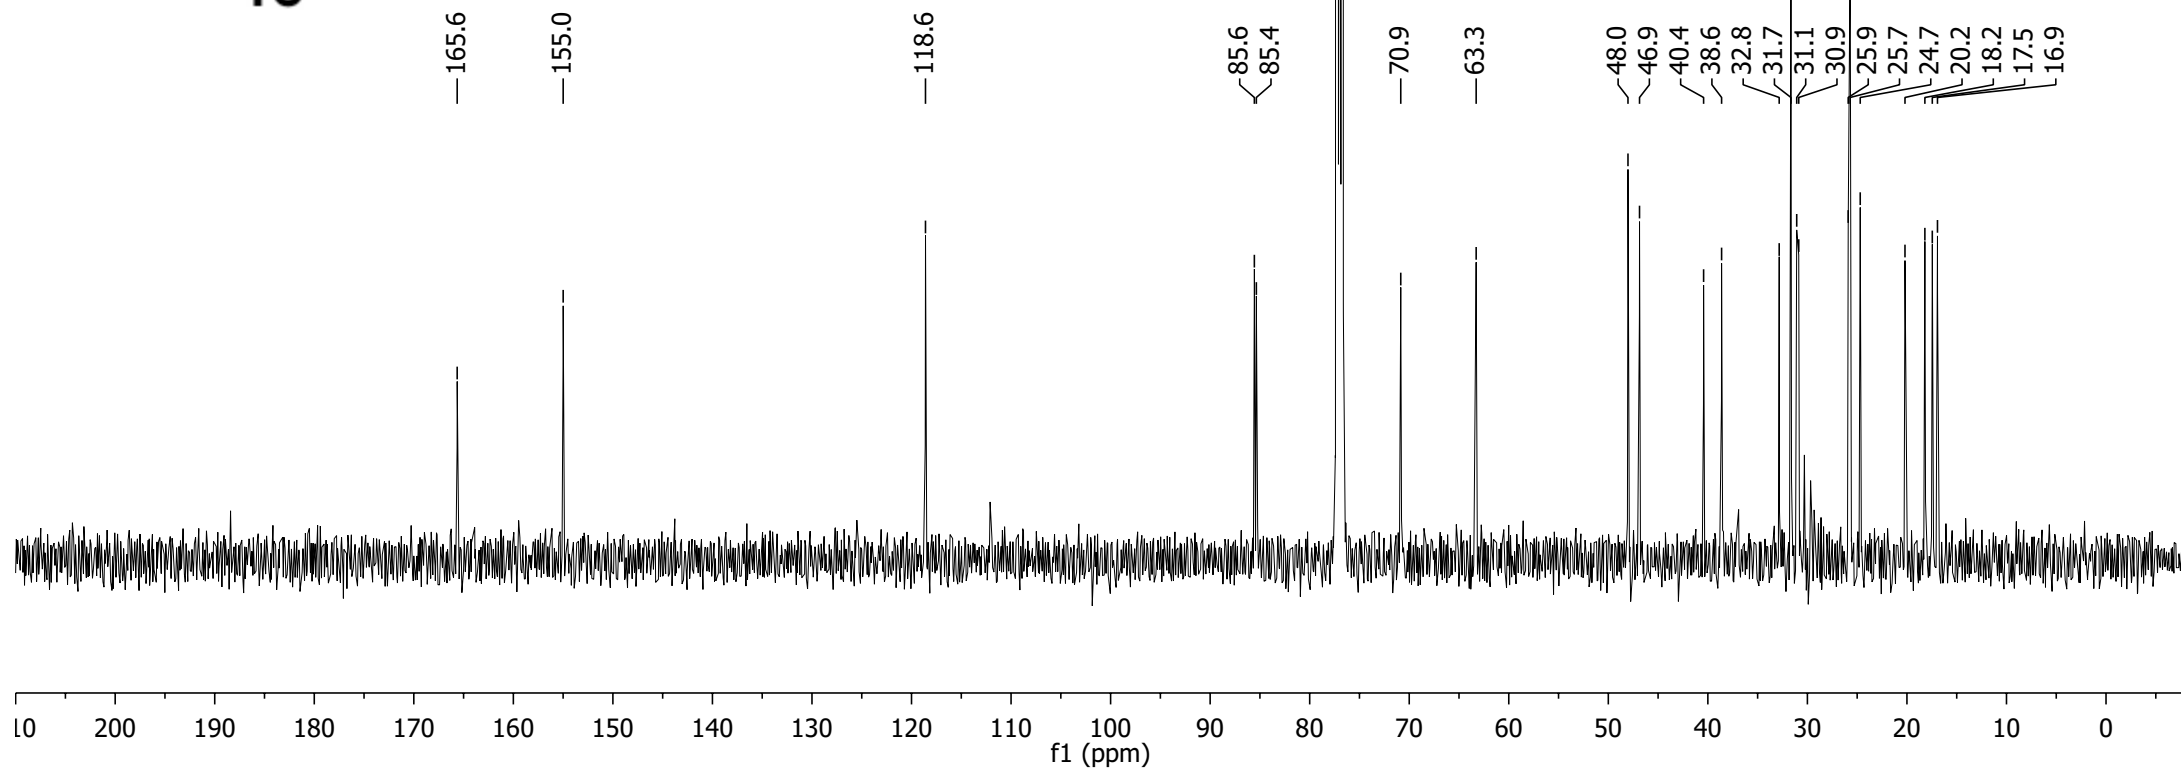

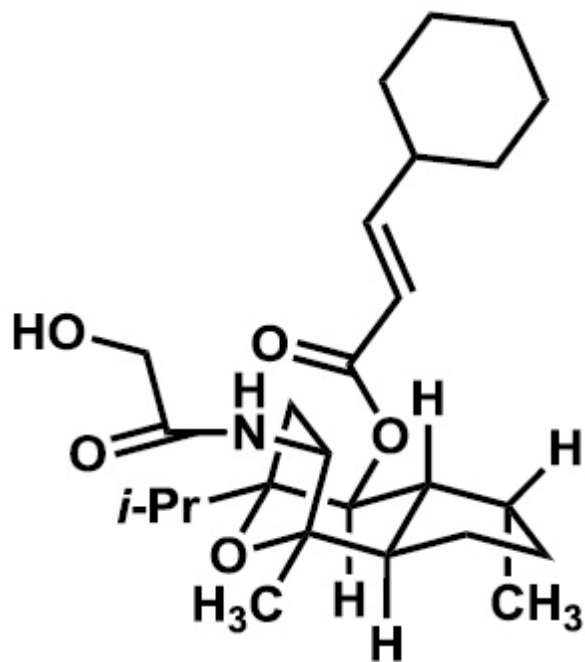

**18**  
**(NSC#768544)**

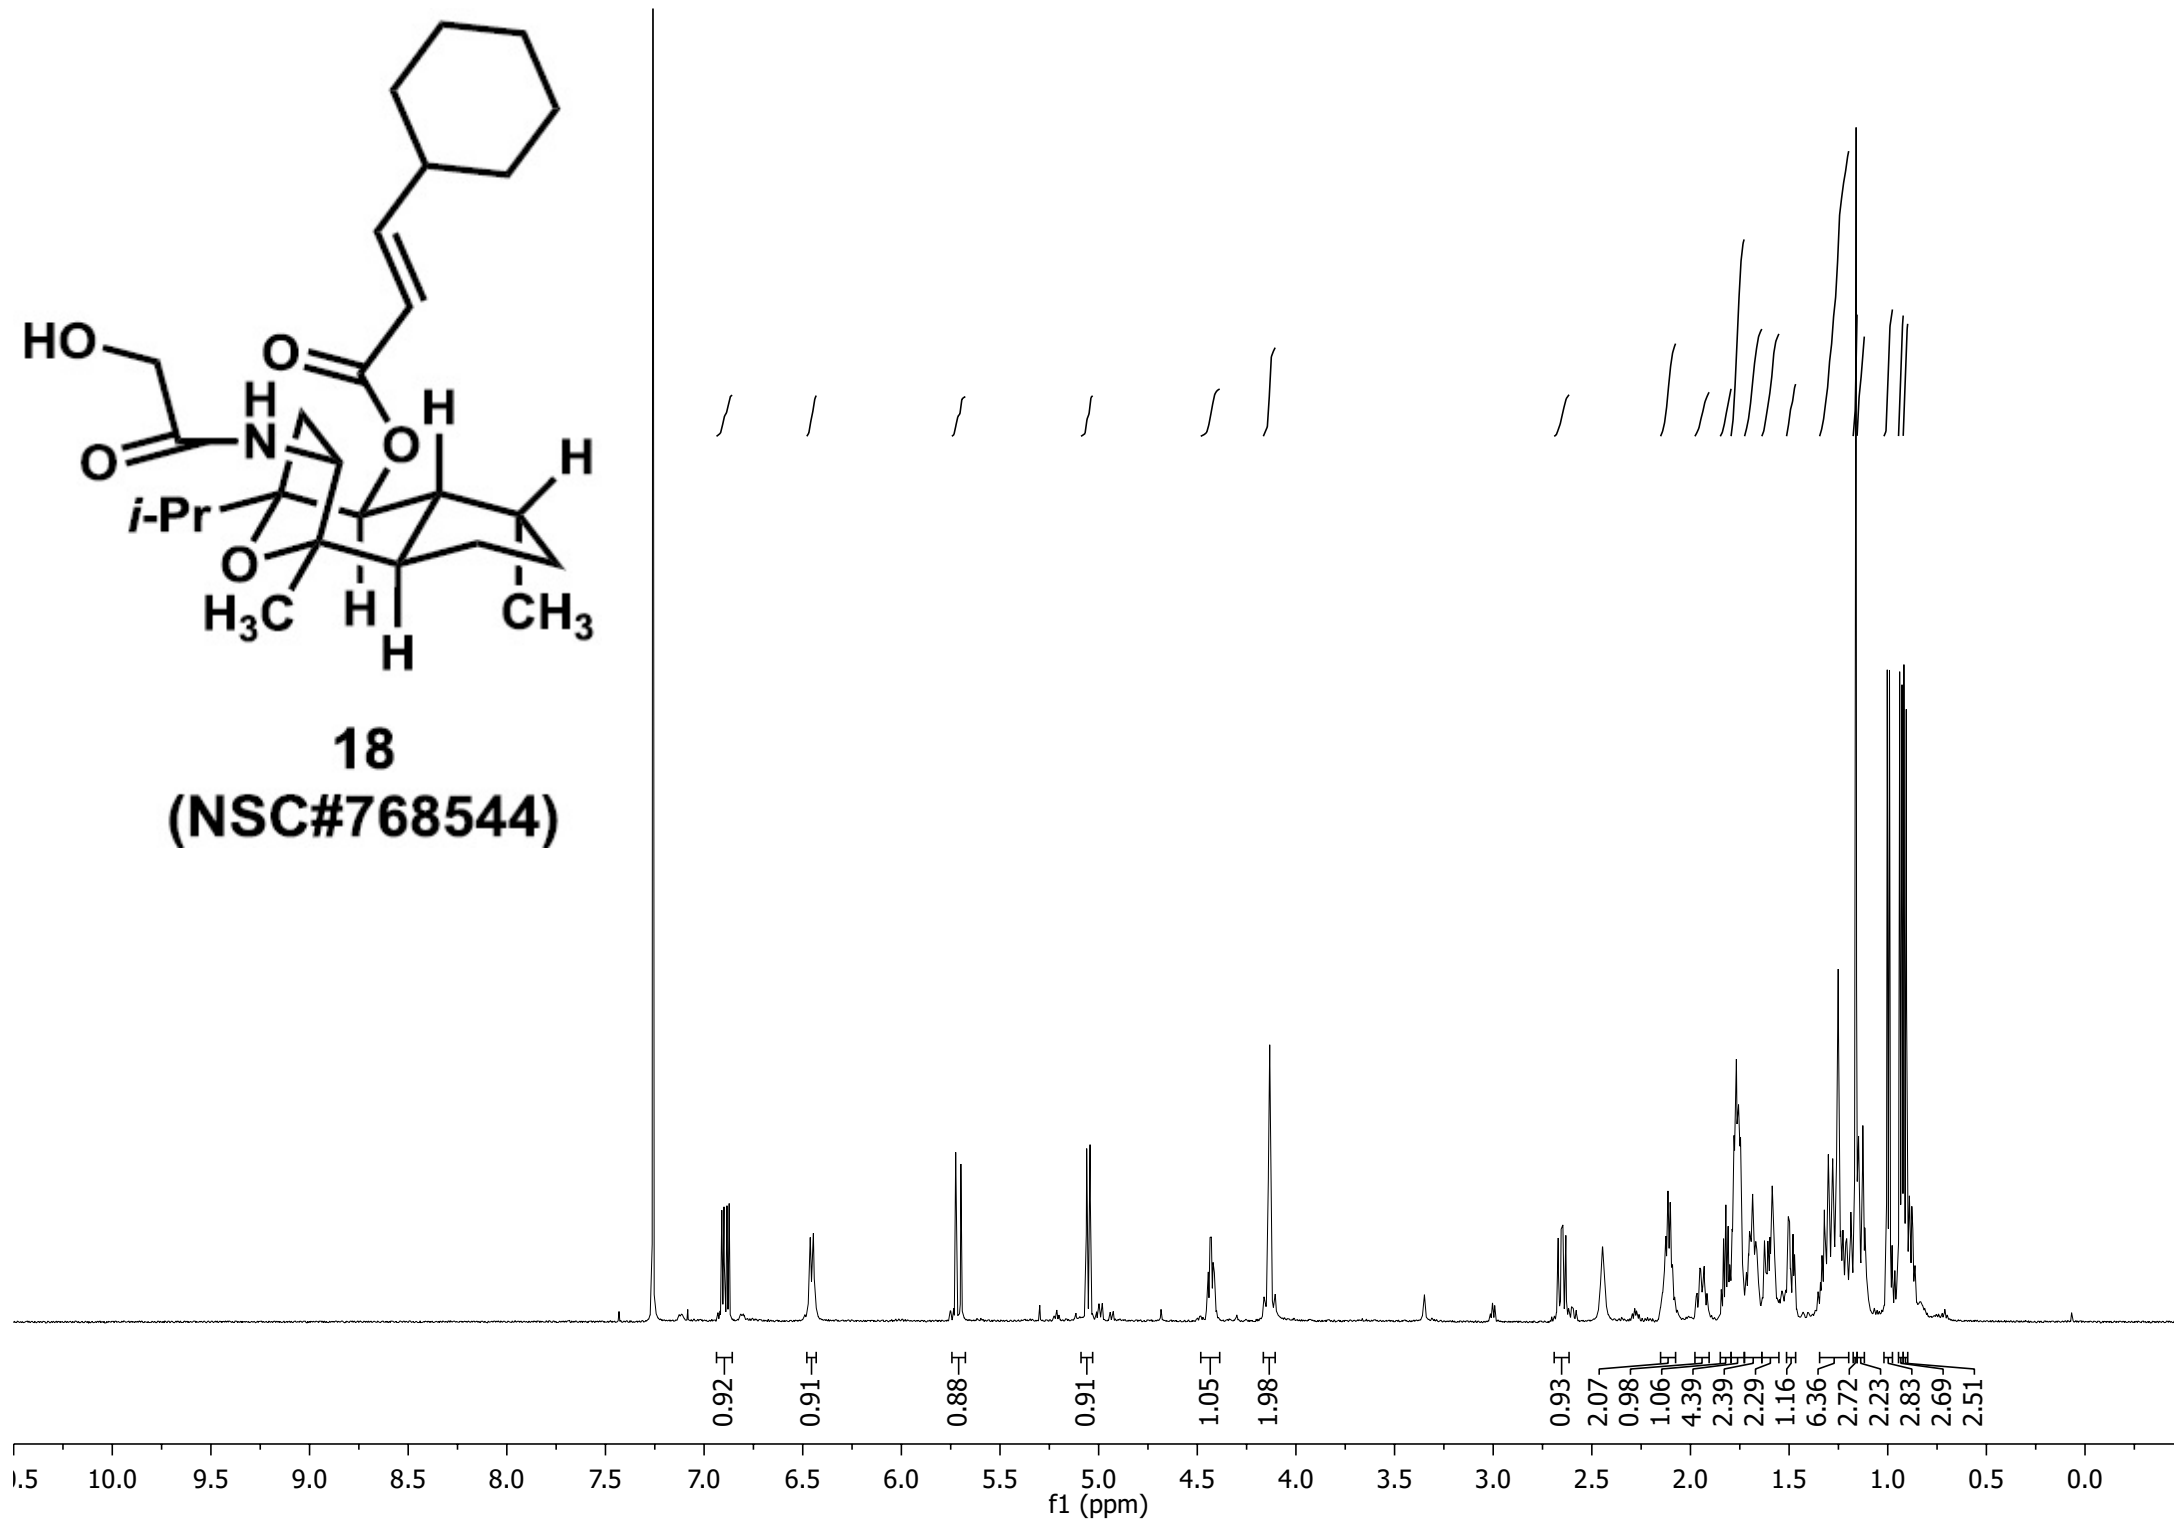



**18**  
**(NSC#768544)**

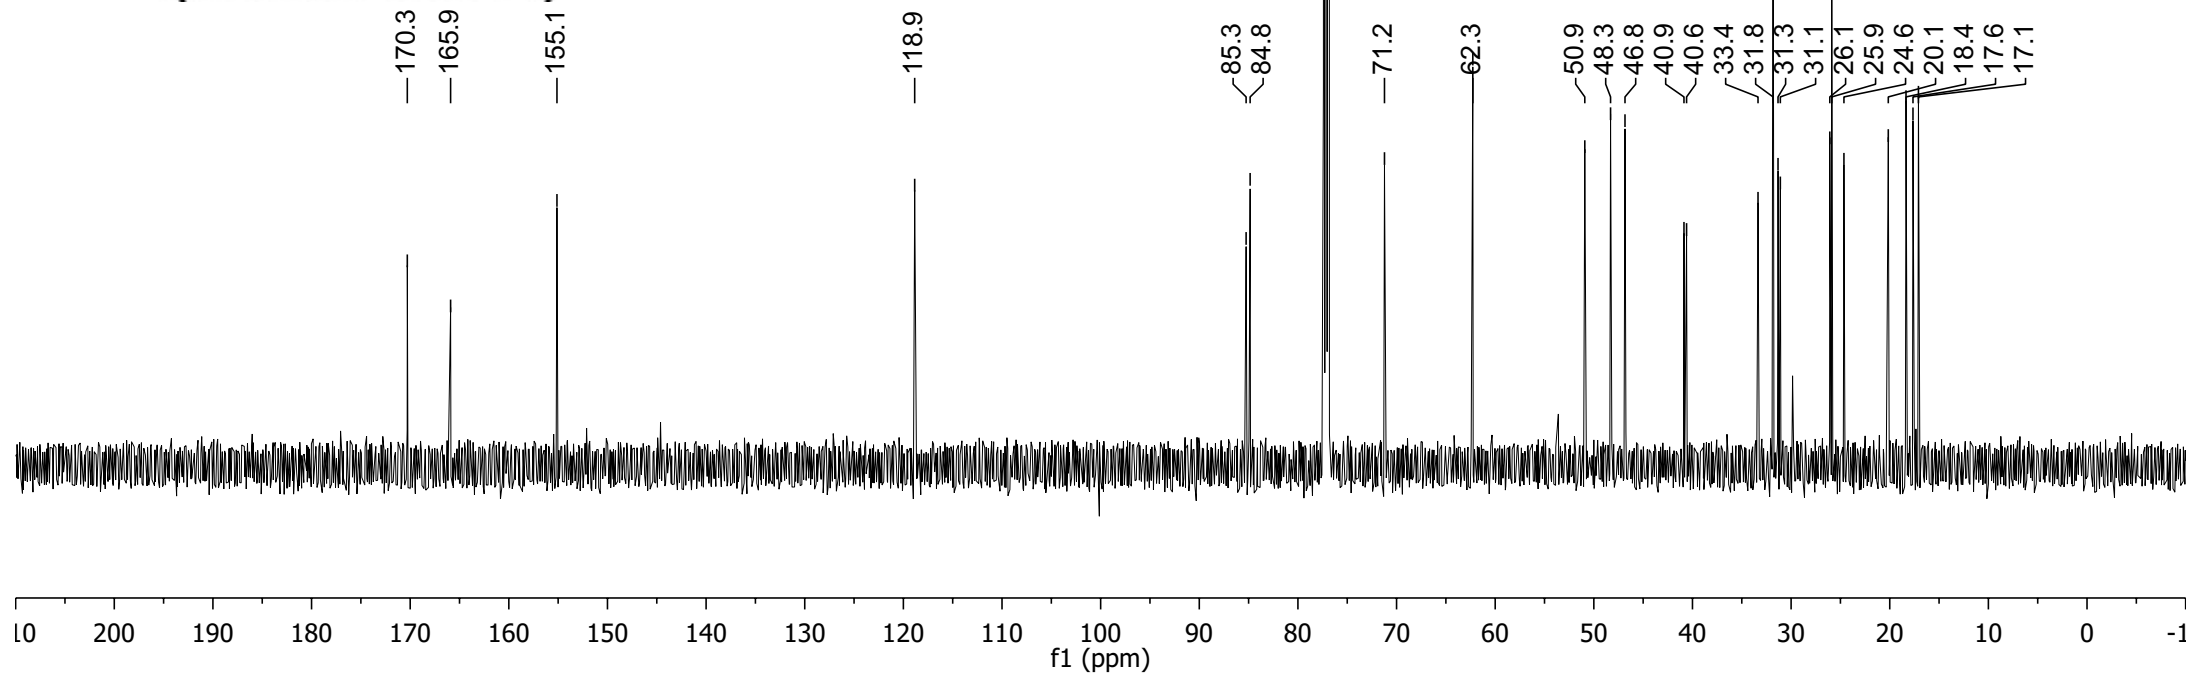

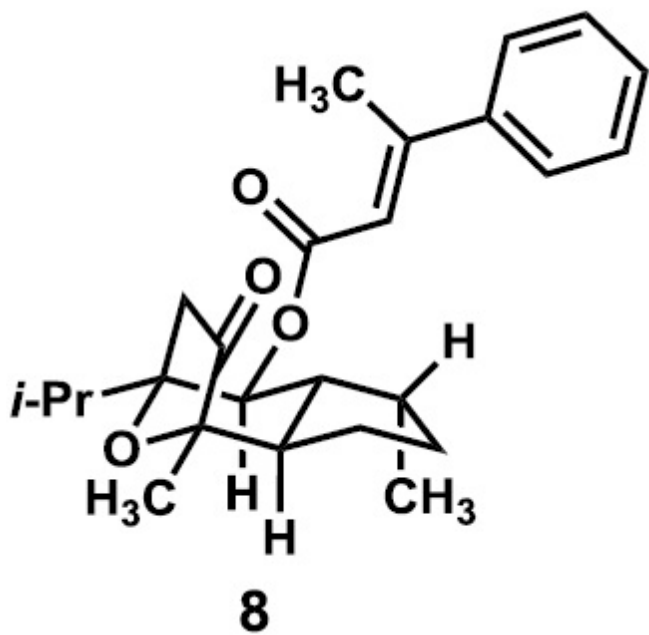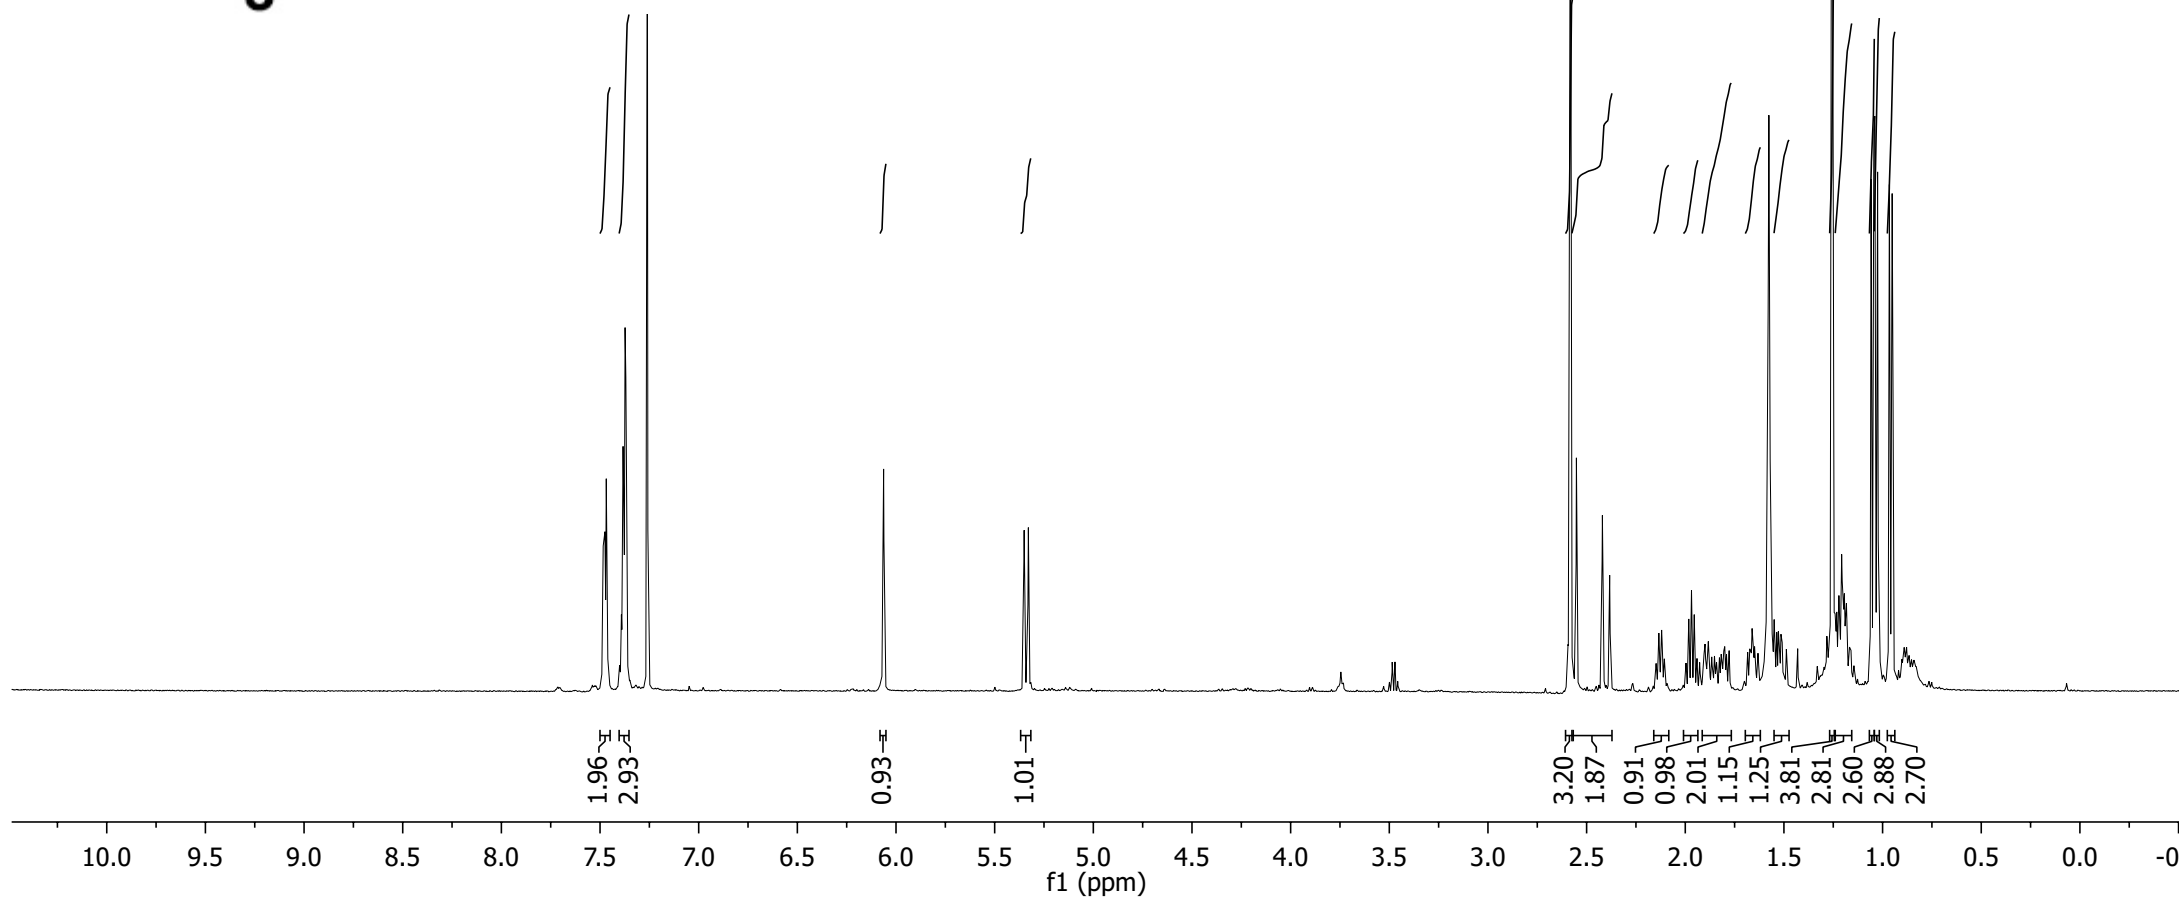

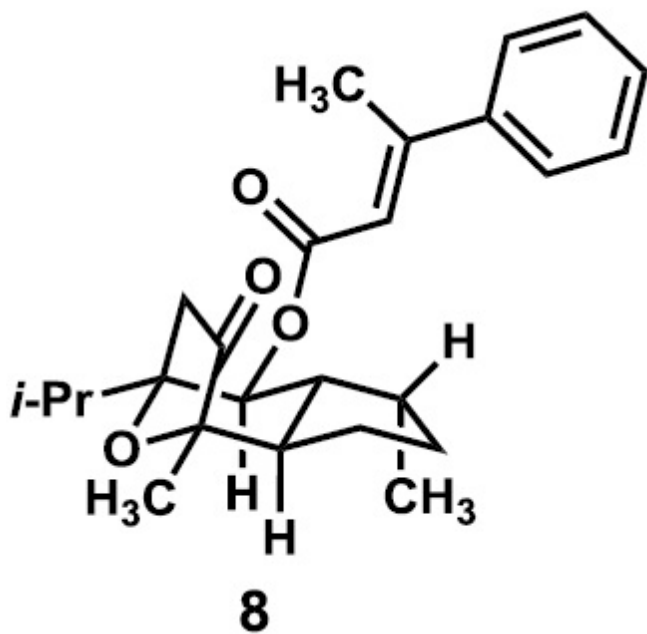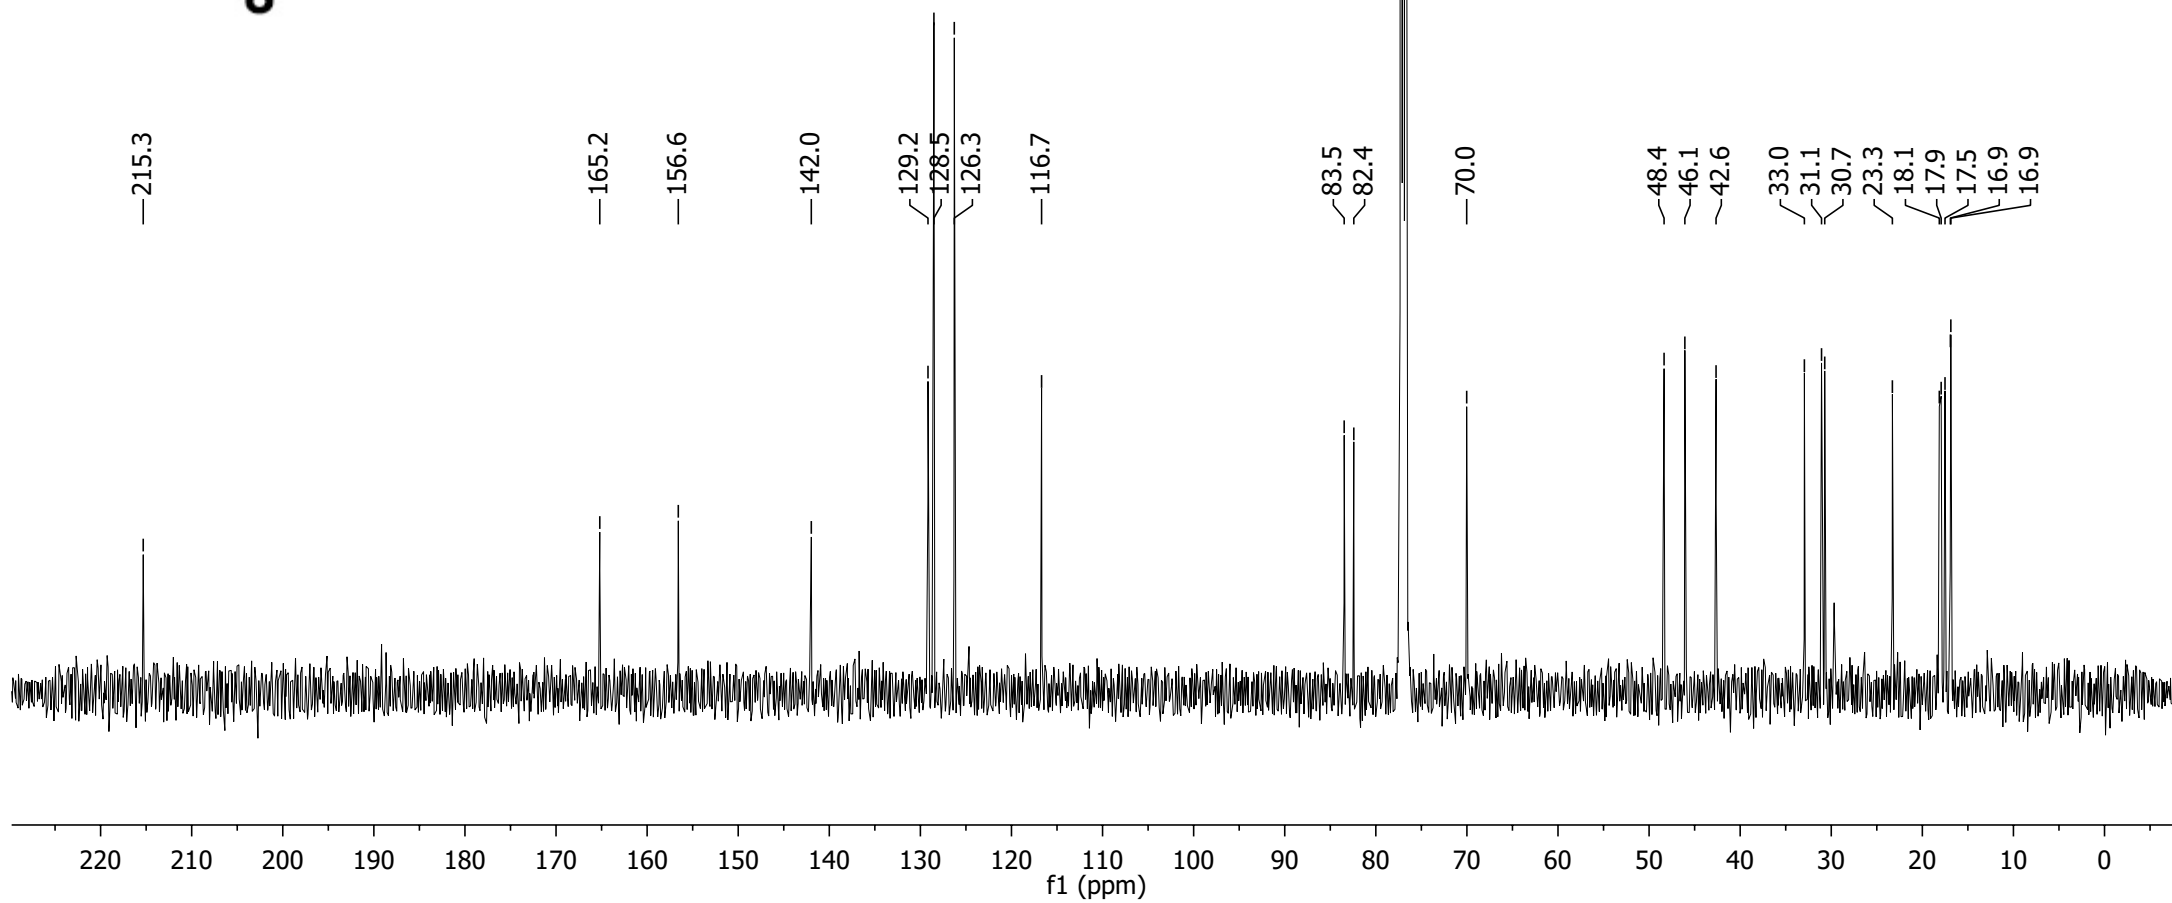

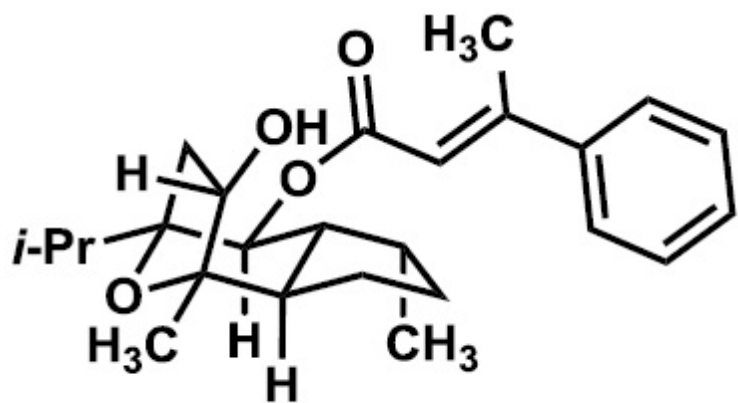

**12**

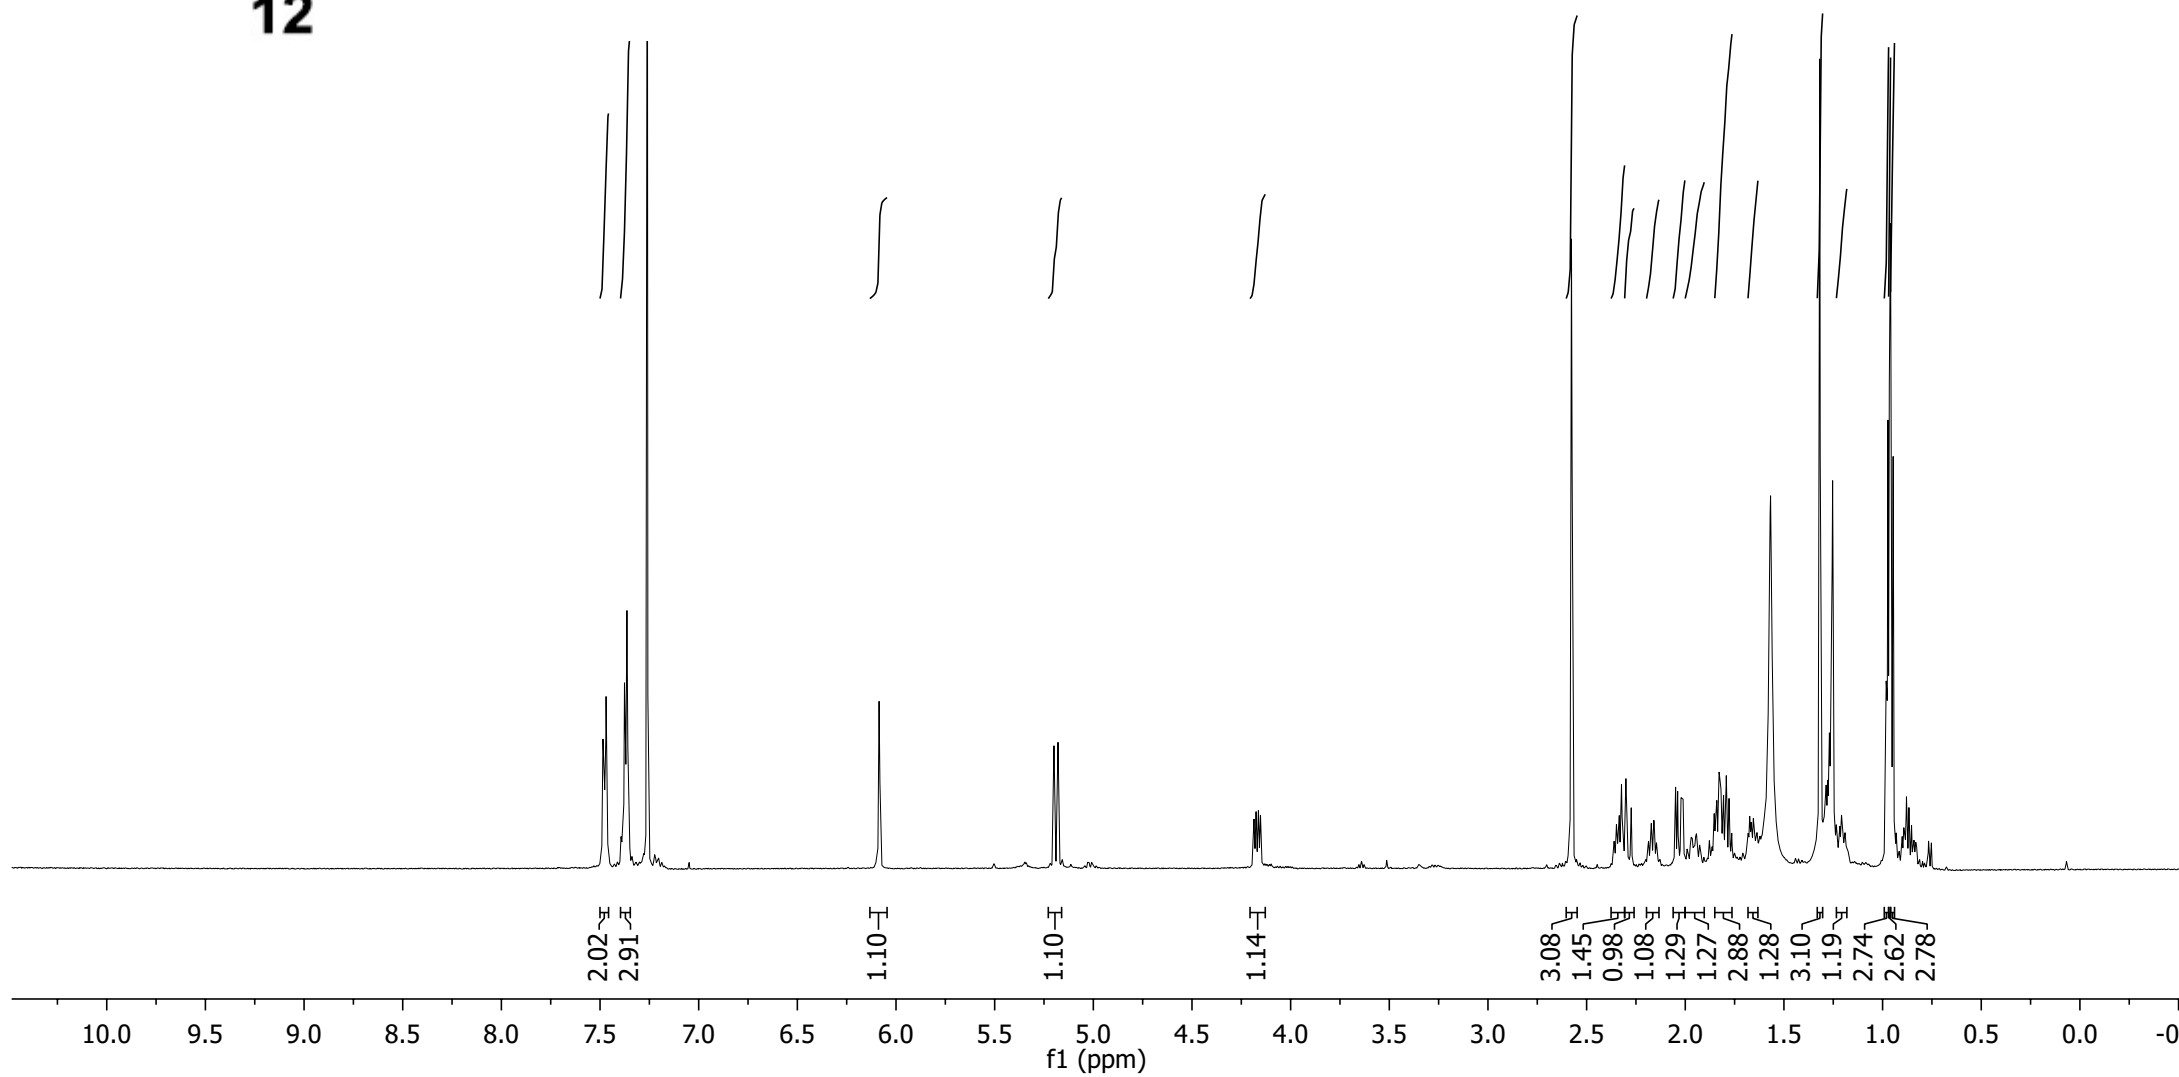

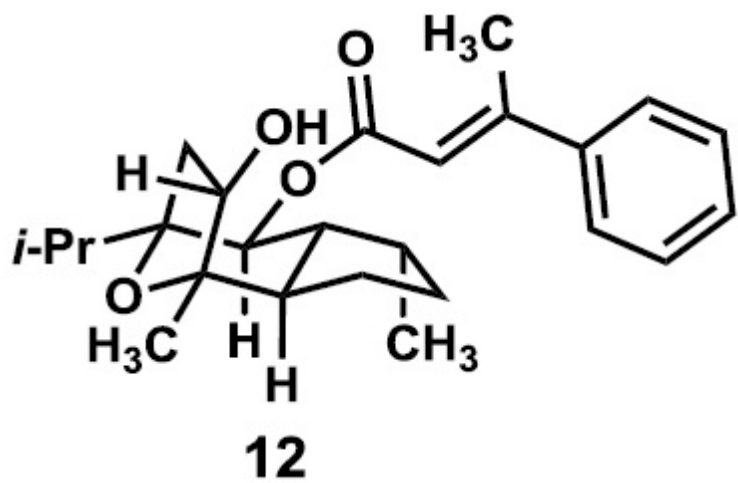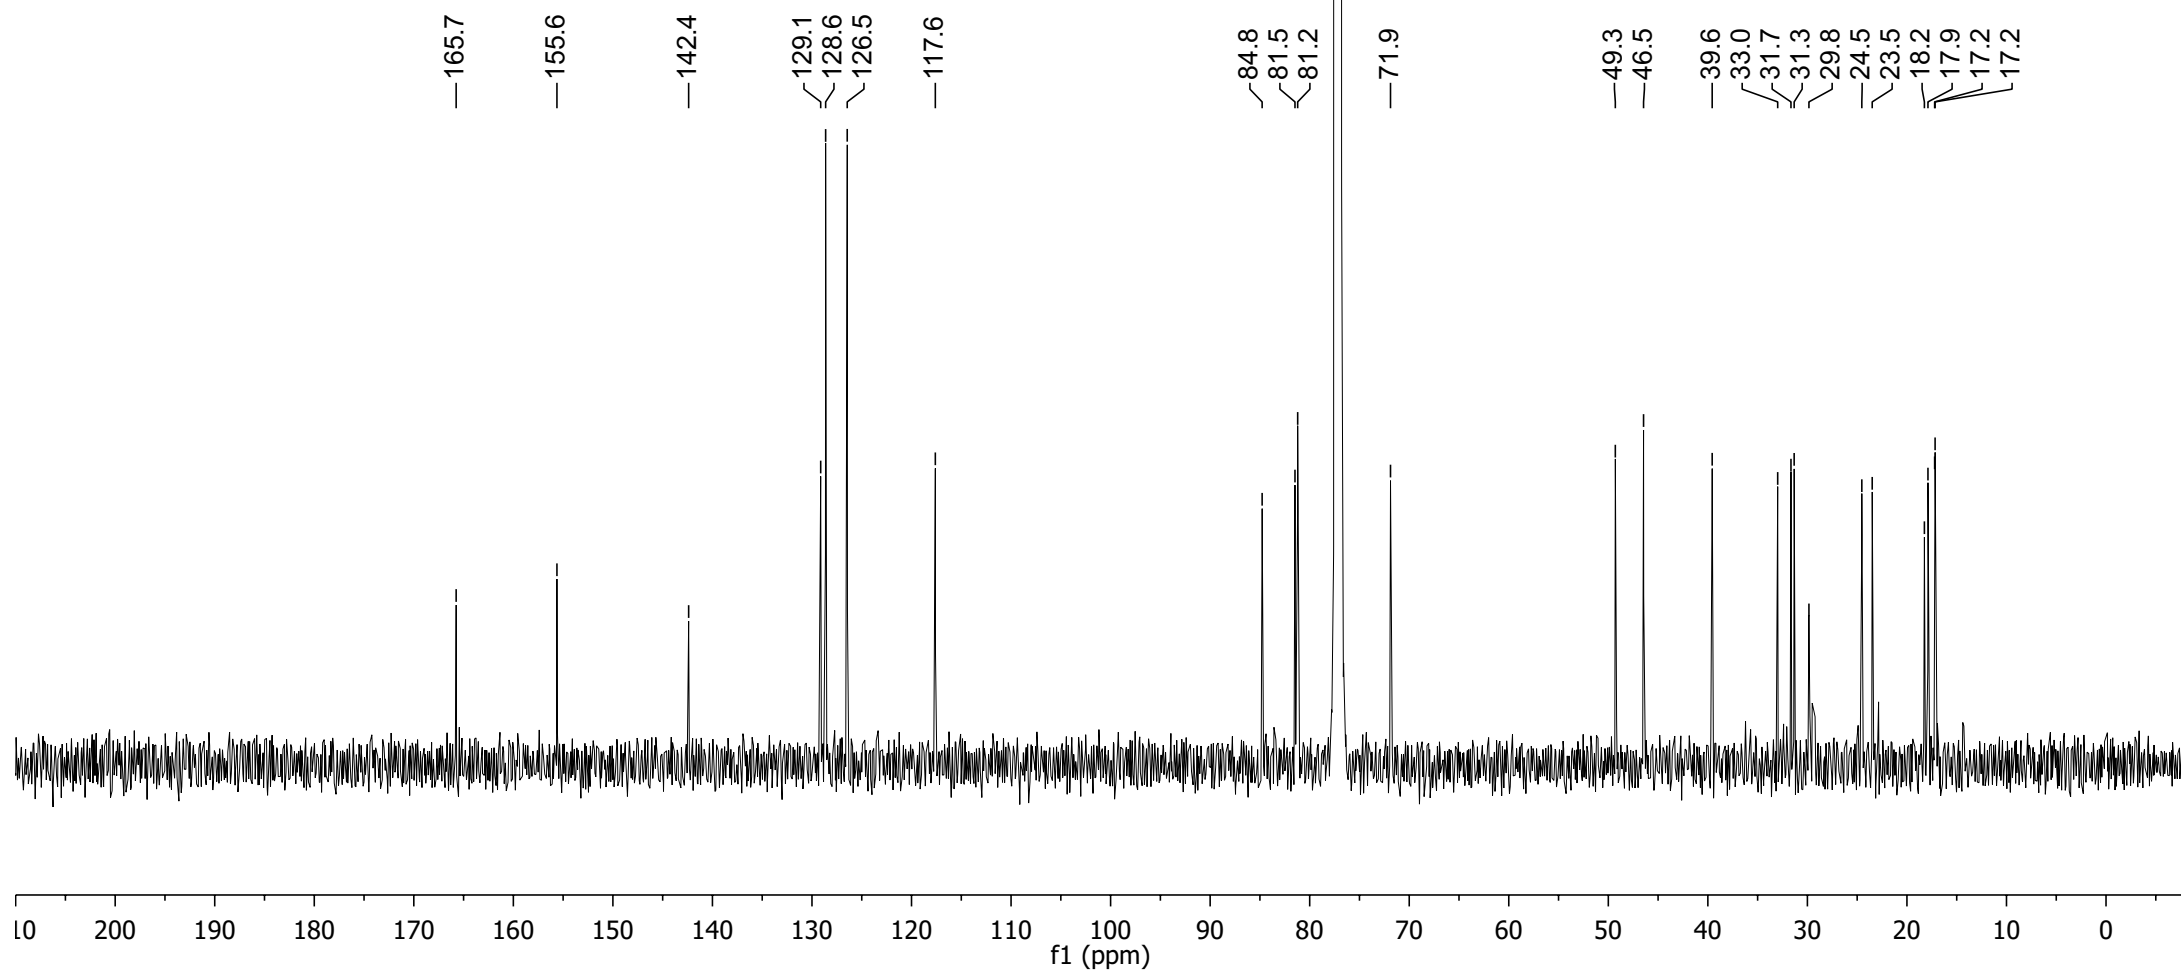

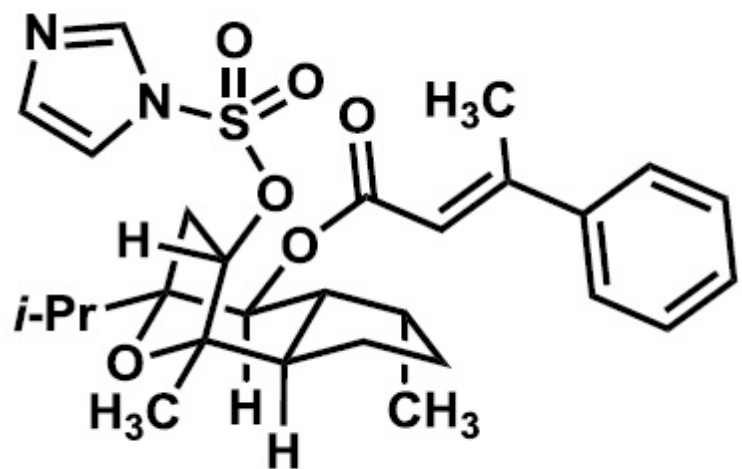

**30**

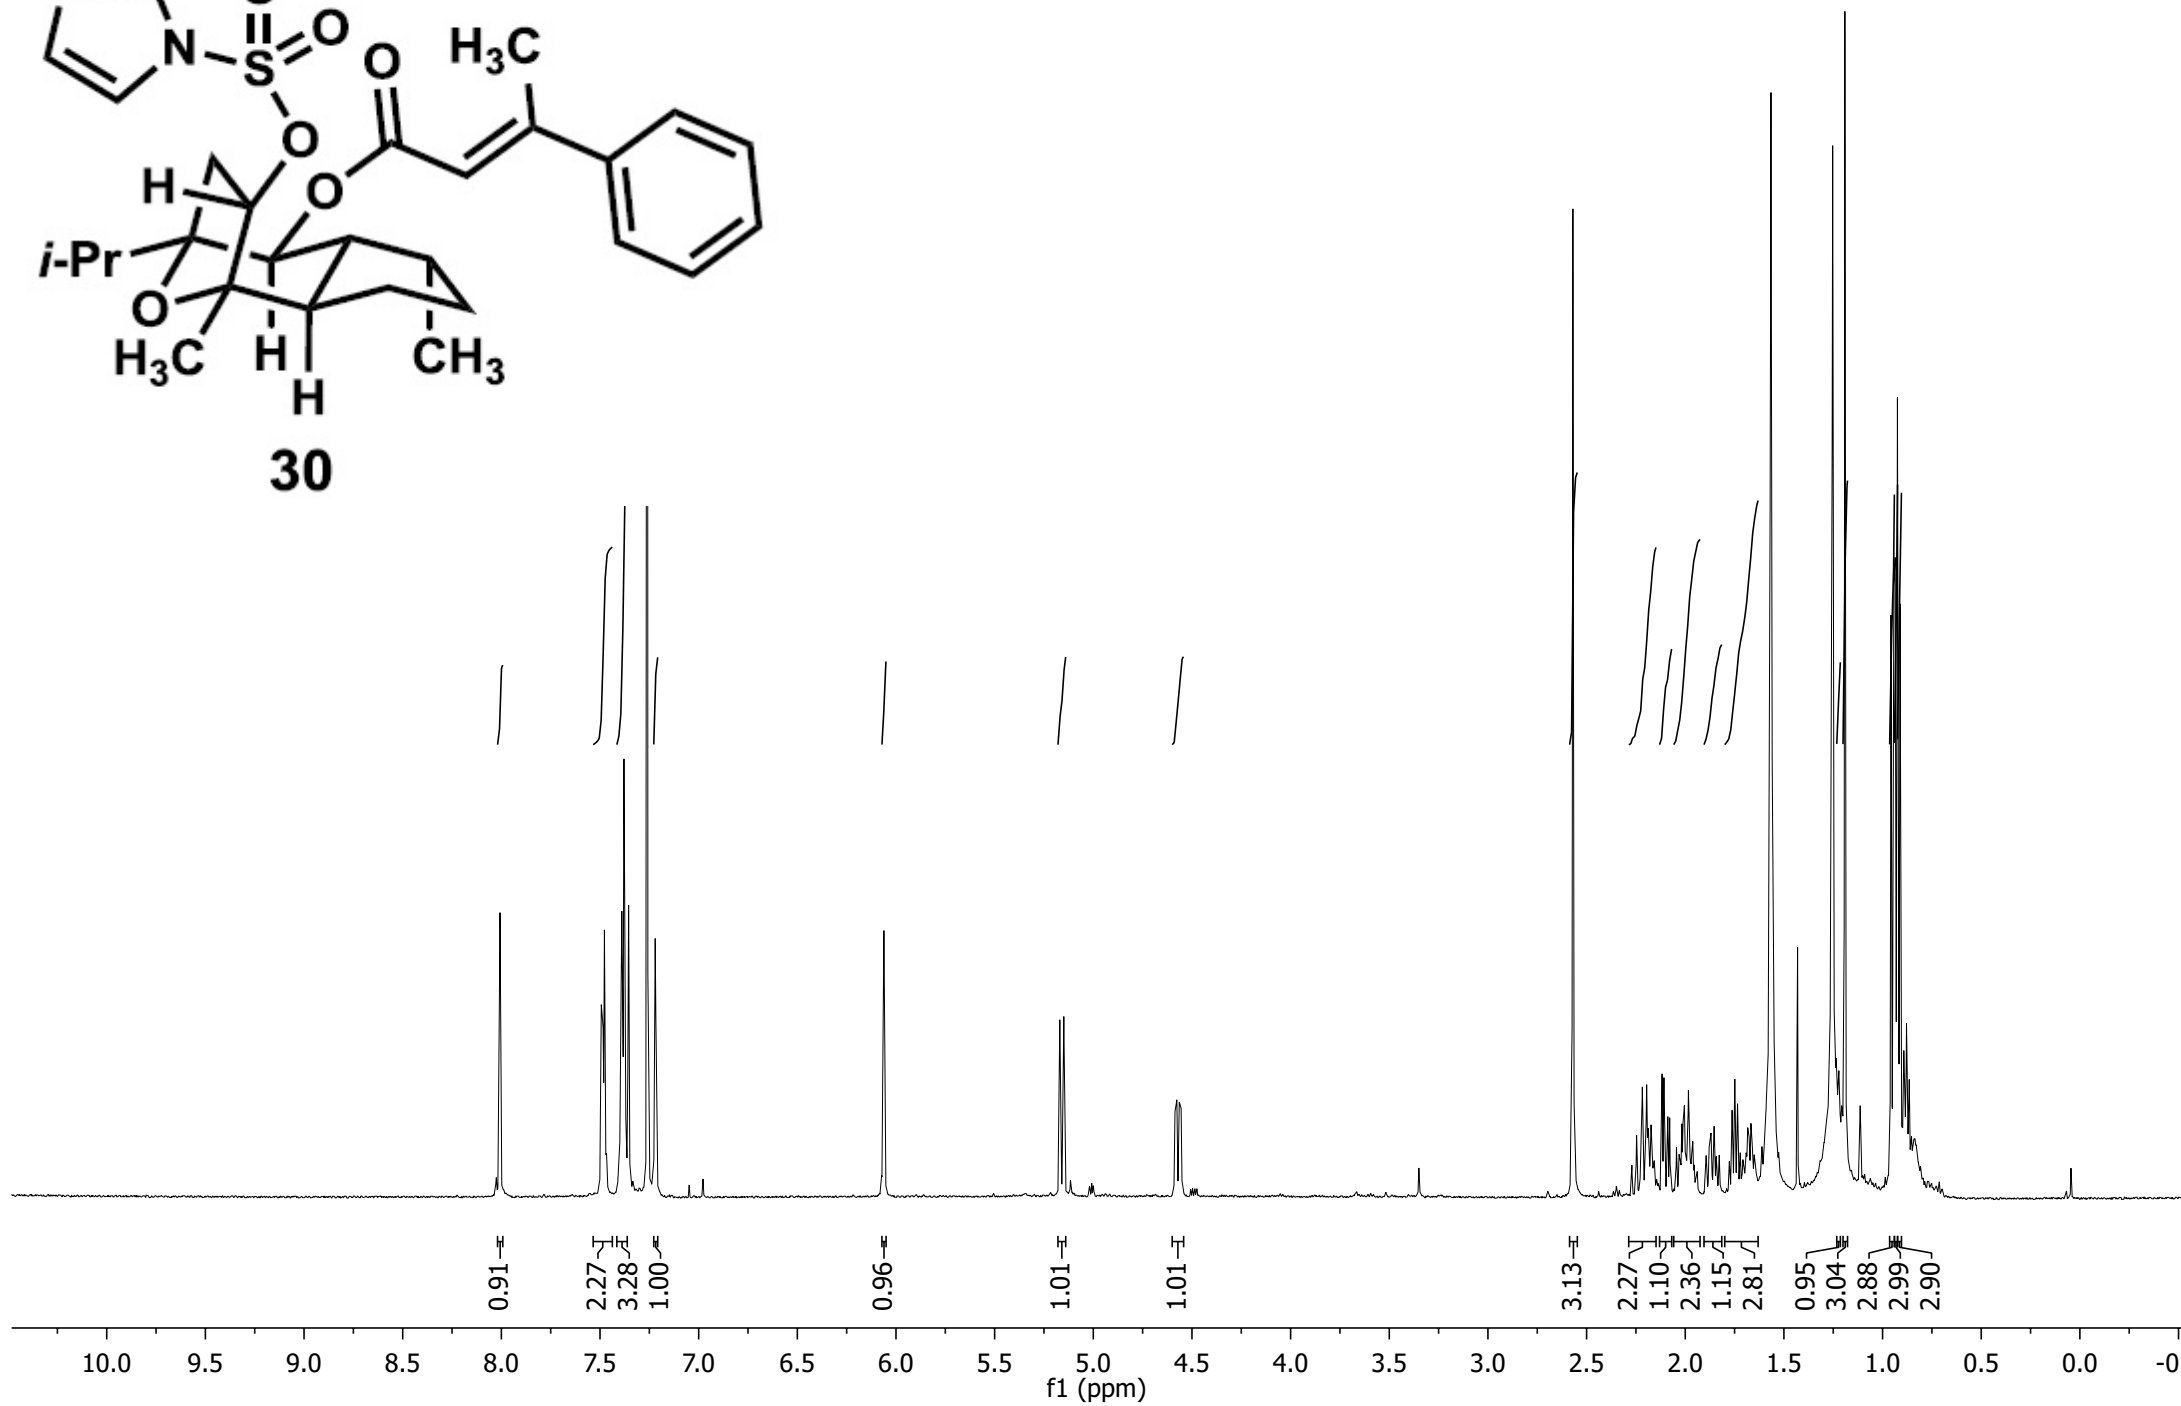

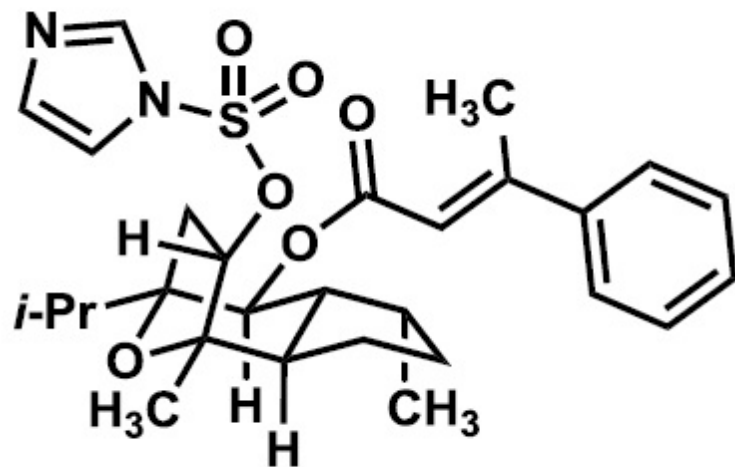

**30**

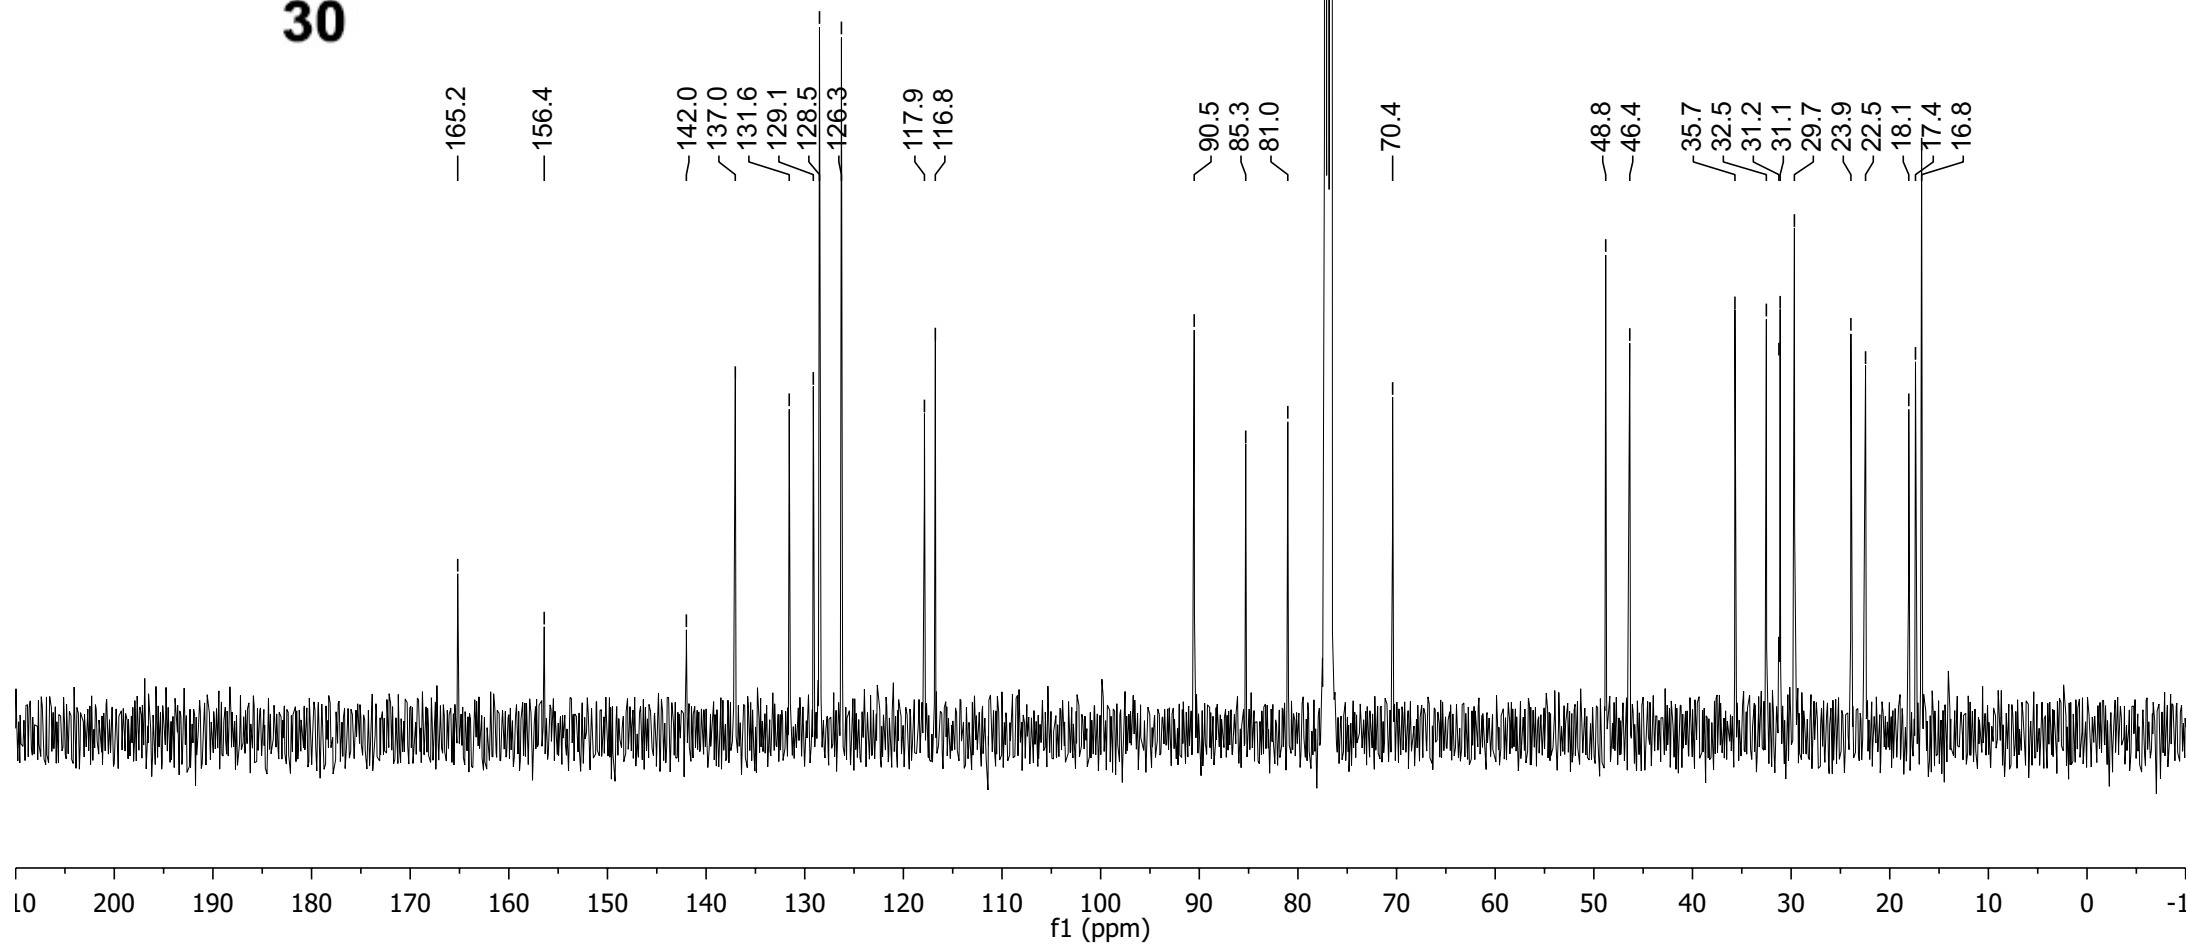

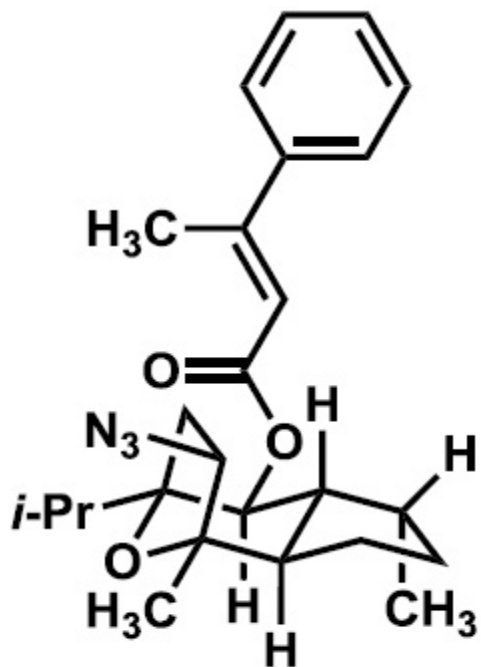

16

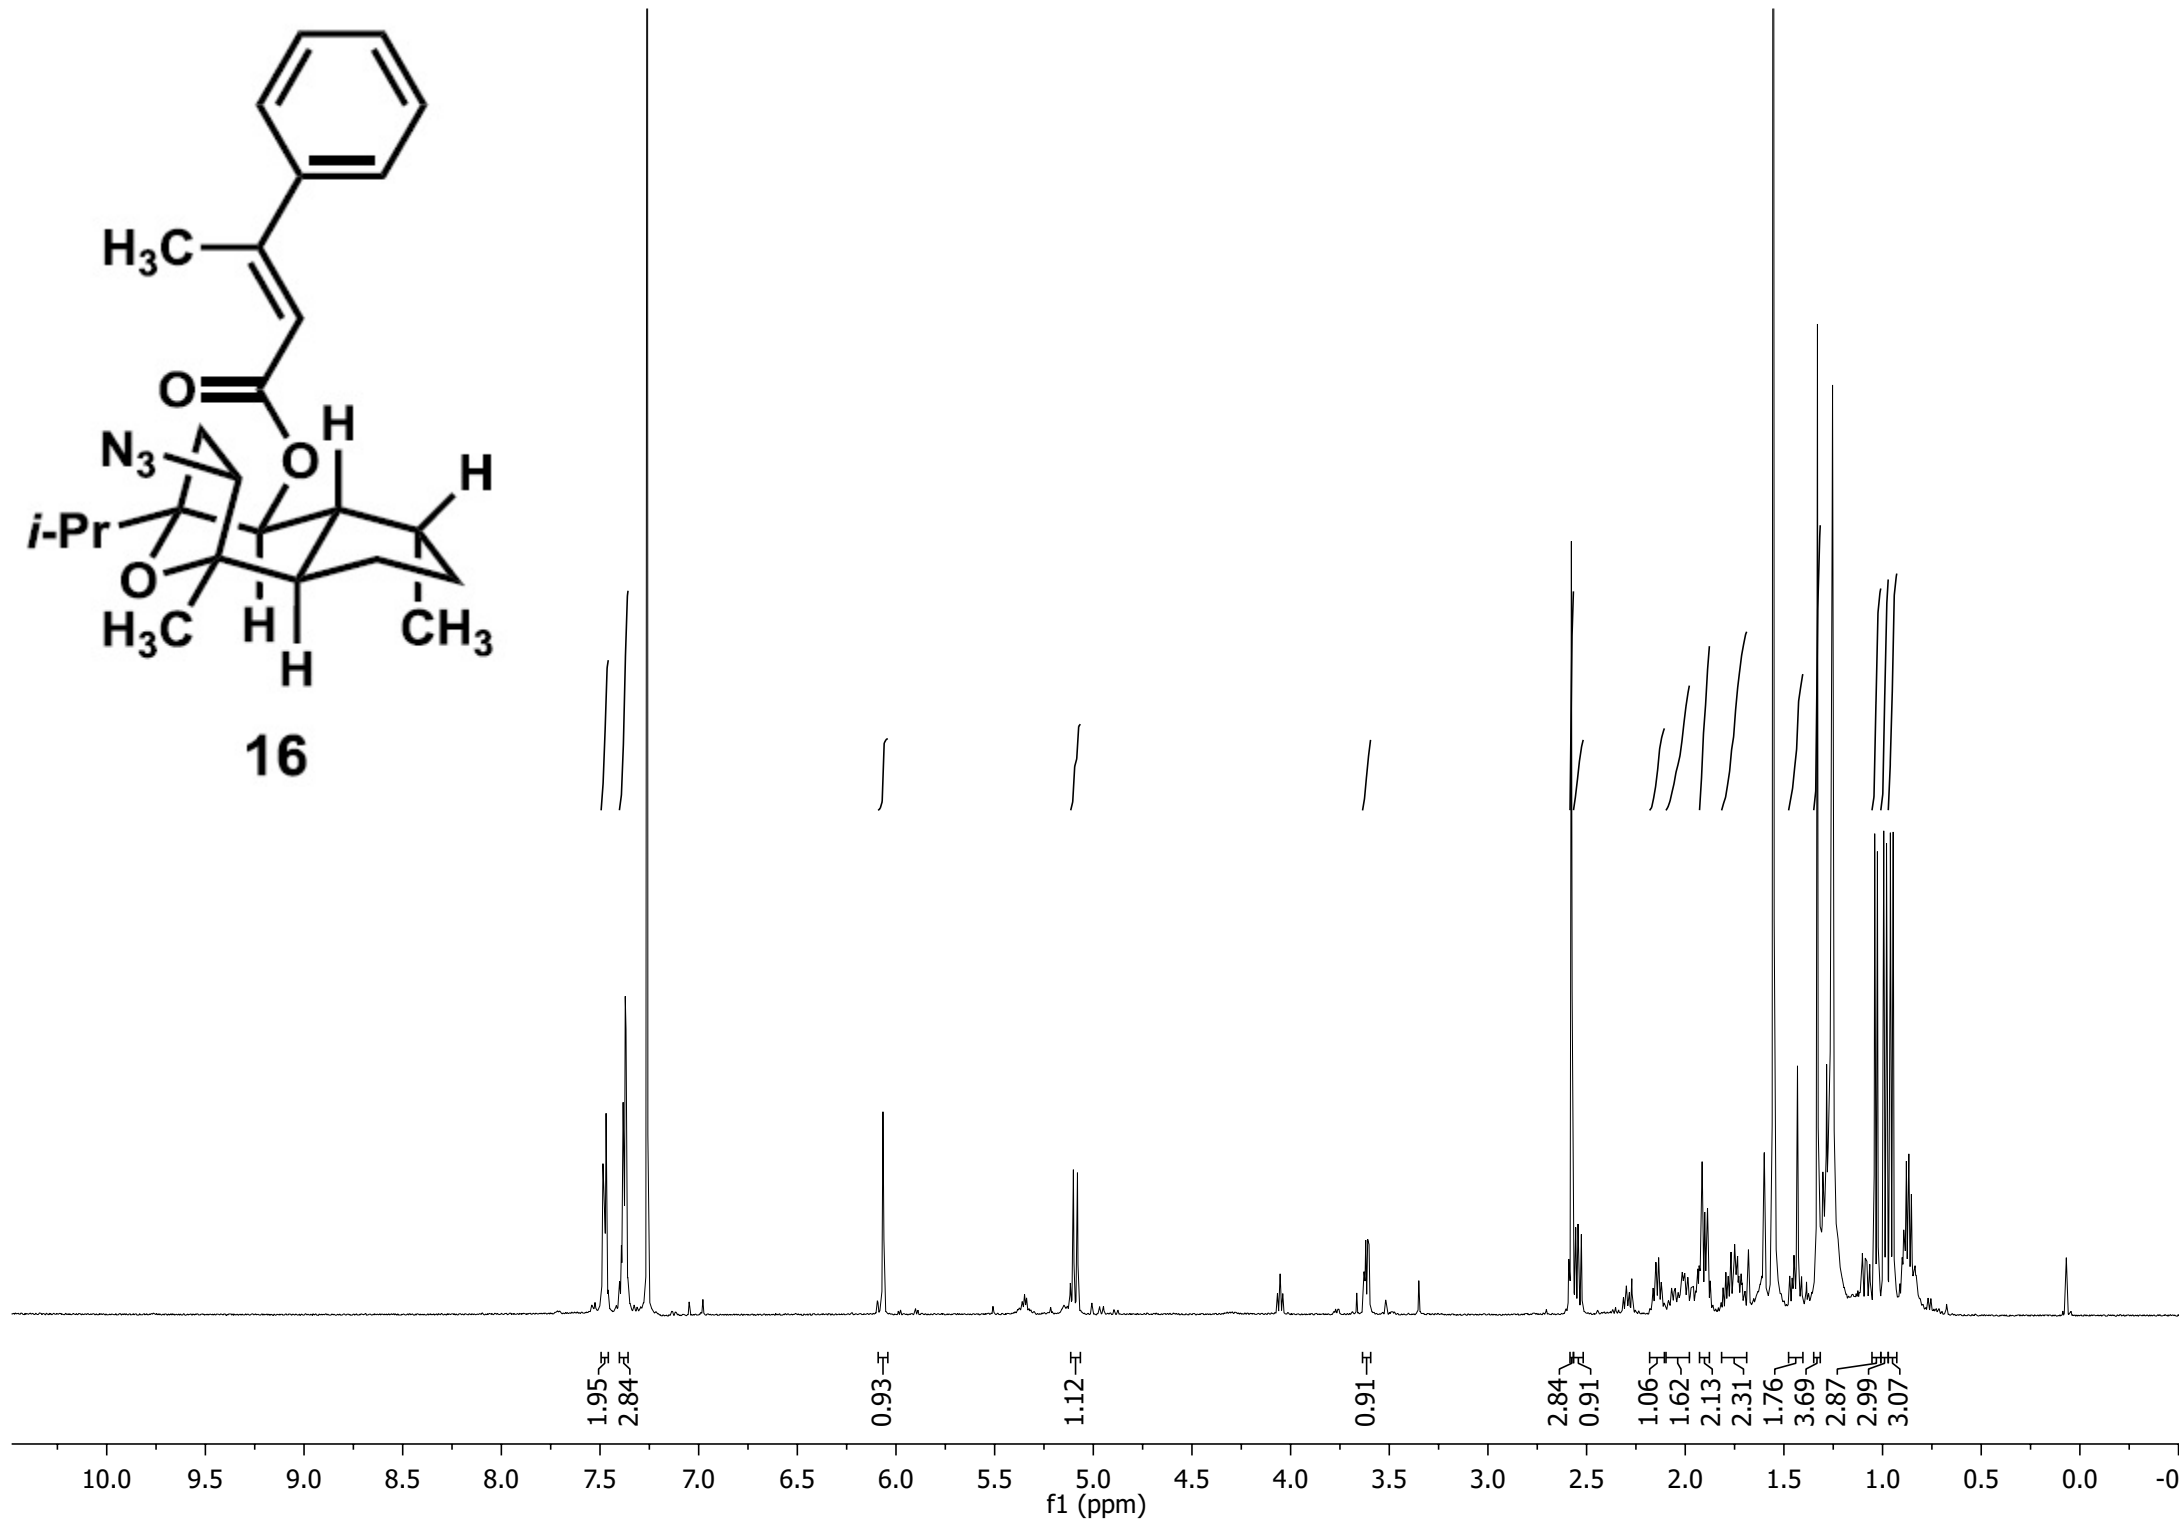



**16**

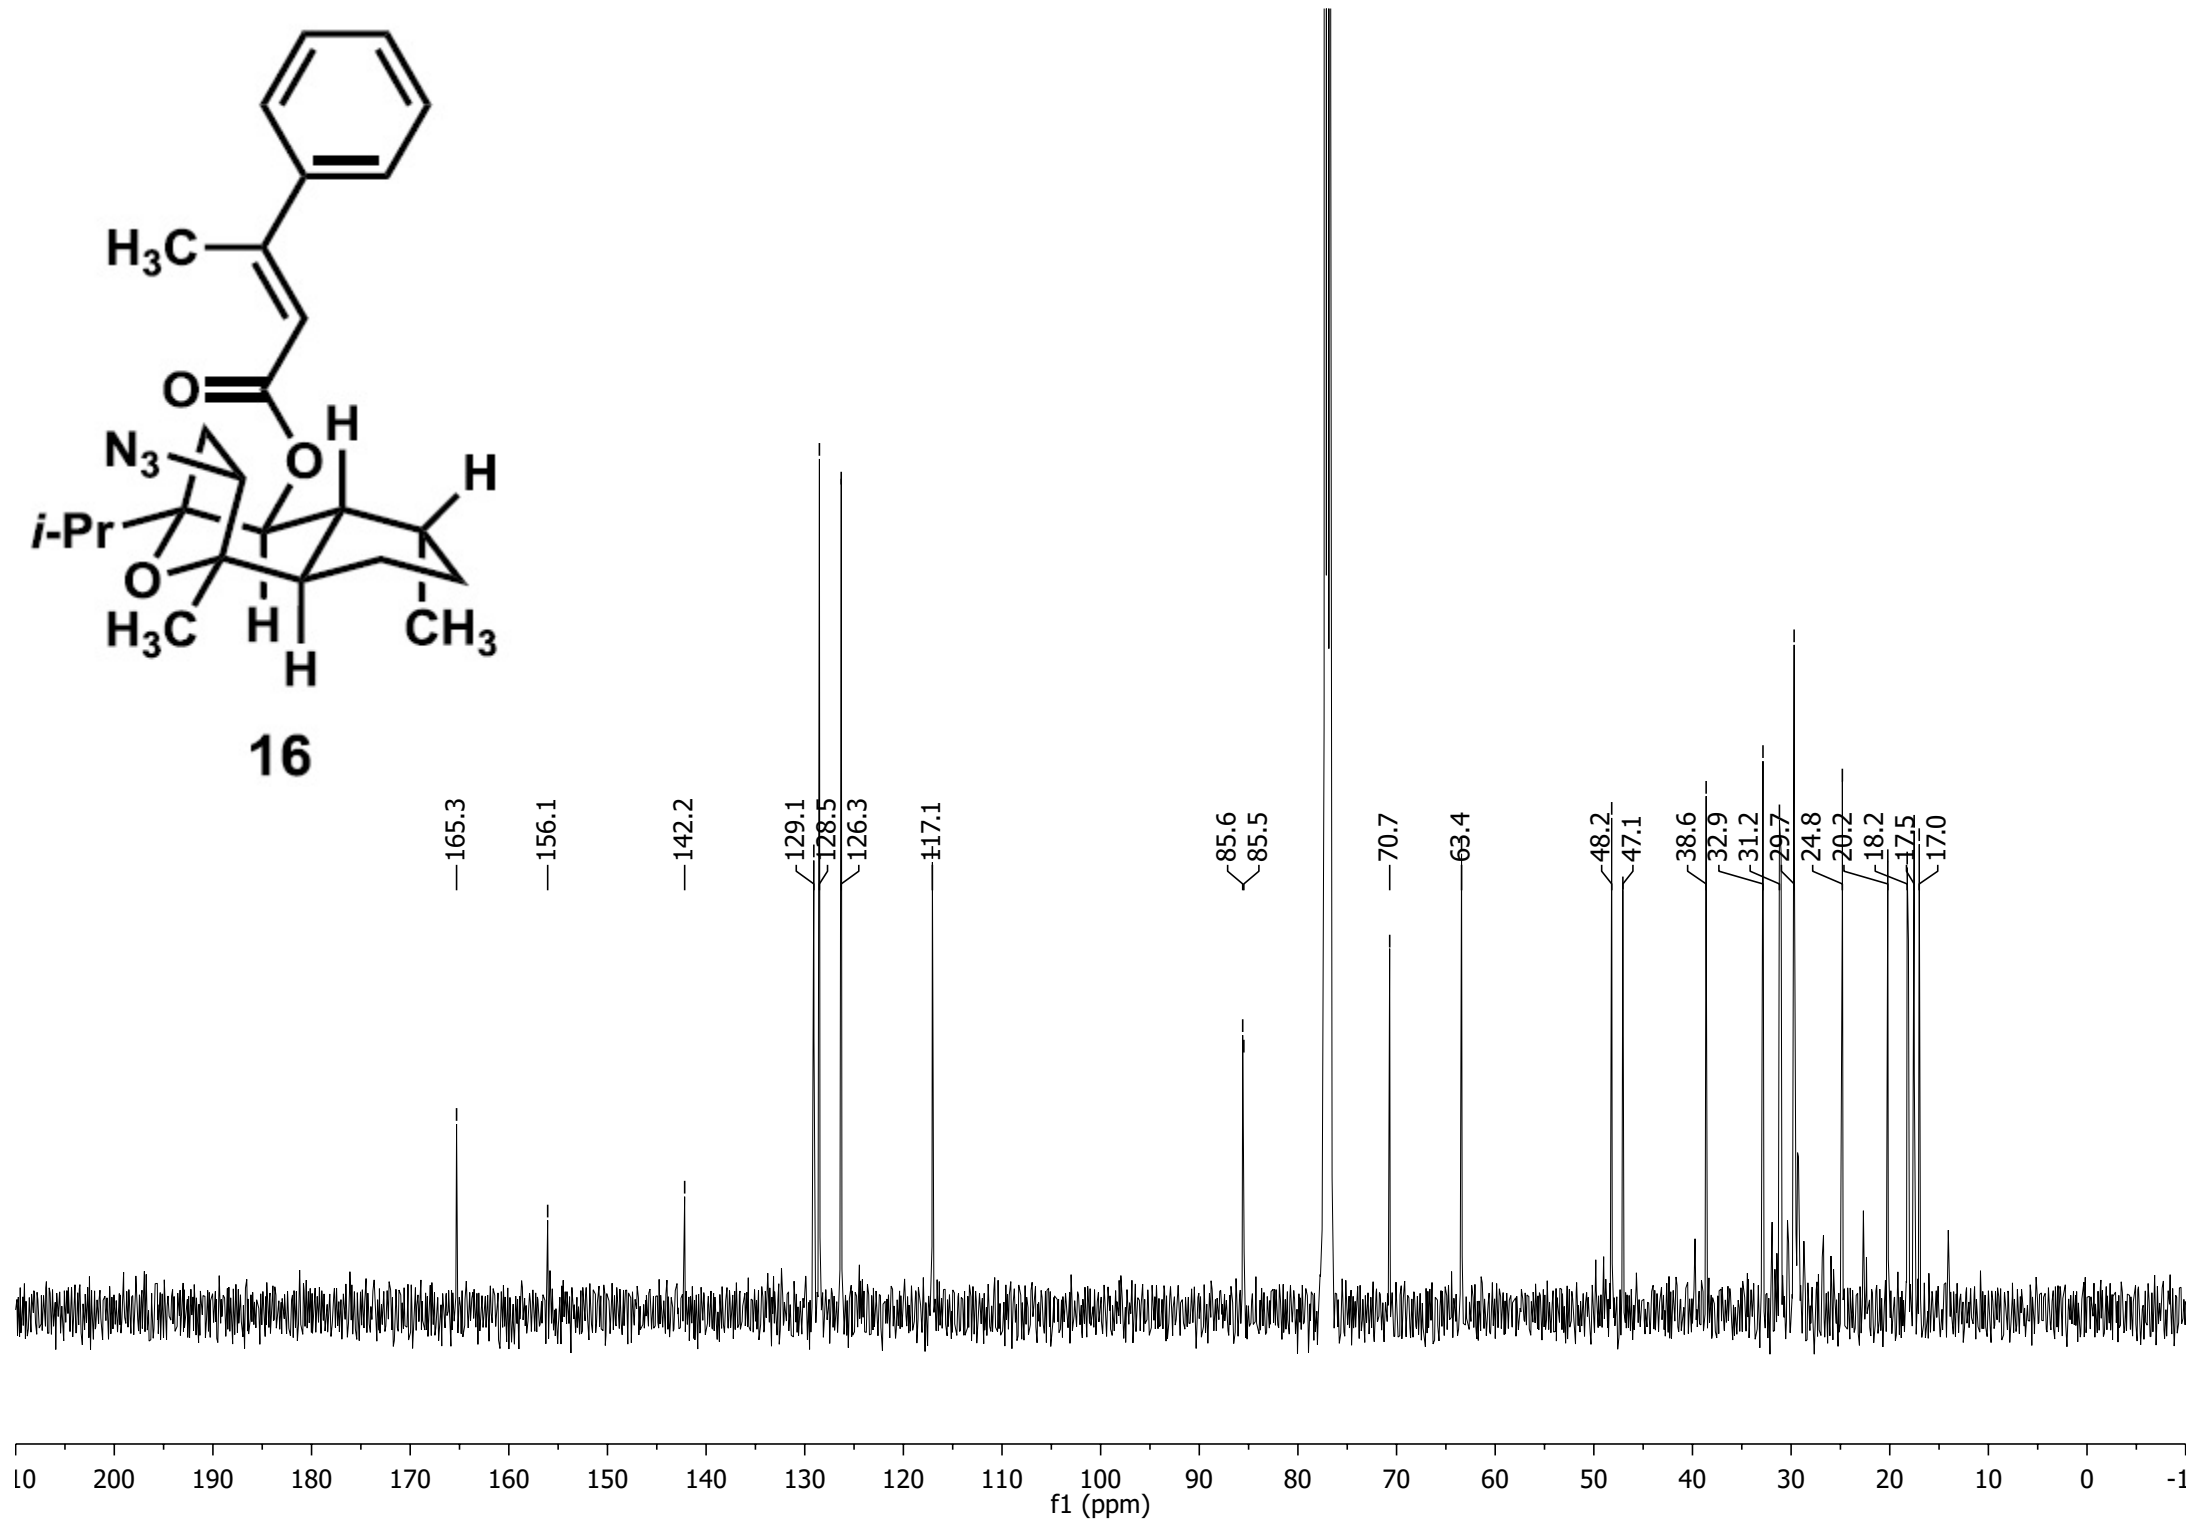

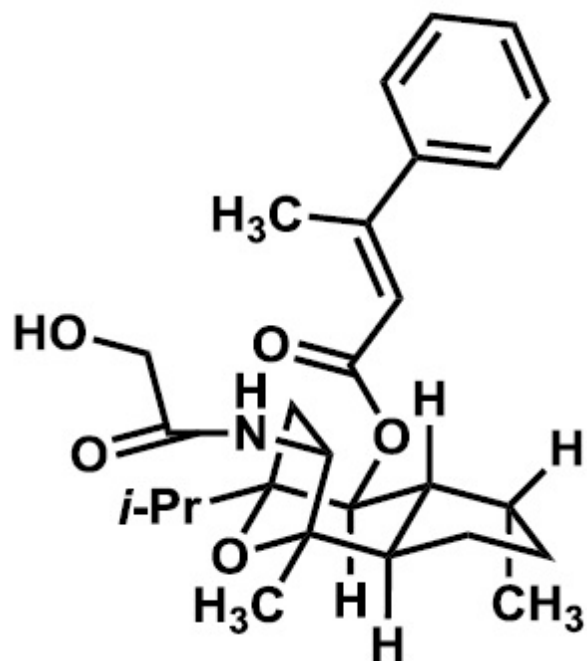

**19**  
**(NSC#778312)**

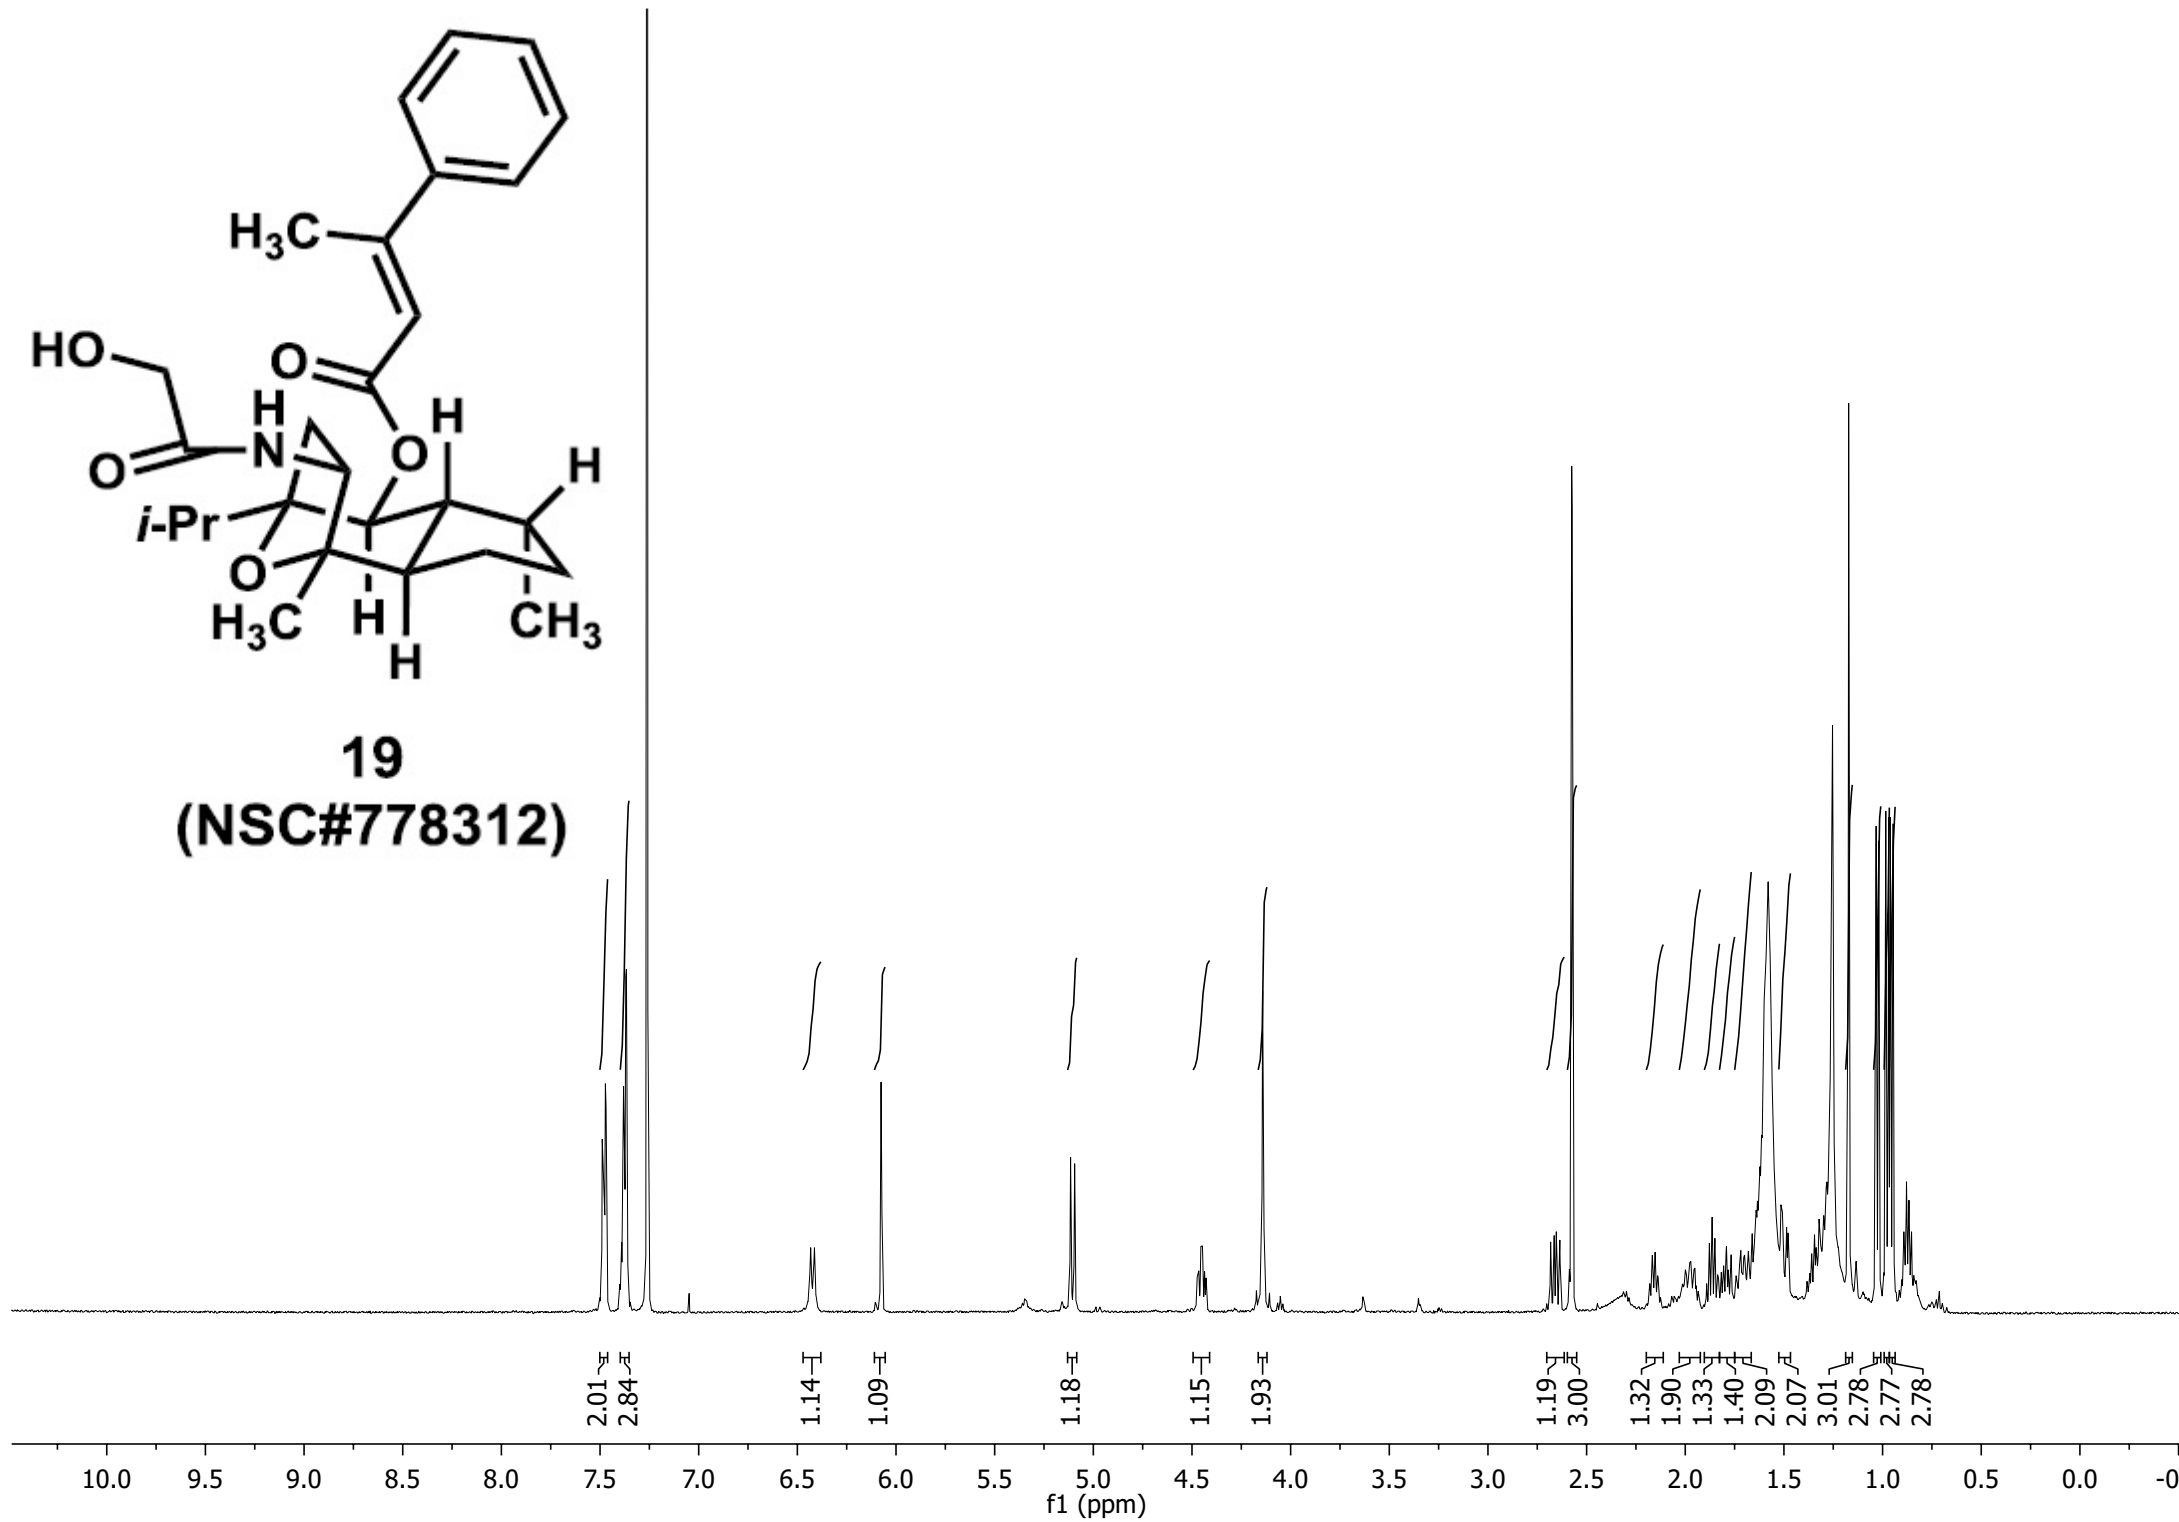

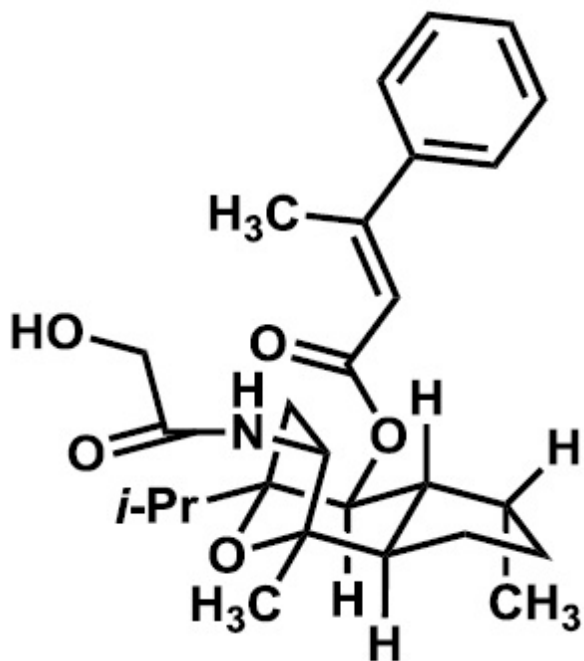

**19**  
**(NSC#778312)**

—170.1  
 —165.4  
 —156.0  
 —142.1  
 —129.1  
 —128.5  
 —126.3  
 —117.1  
 —85.2  
 —84.7  
 —70.8  
 —62.1  
 —50.8  
 —48.2  
 —46.8  
 —40.6  
 —33.2  
 —31.2  
 —31.0  
 —29.7  
 —24.6  
 —20.0  
 —18.2  
 —18.1  
 —17.5  
 —17.0

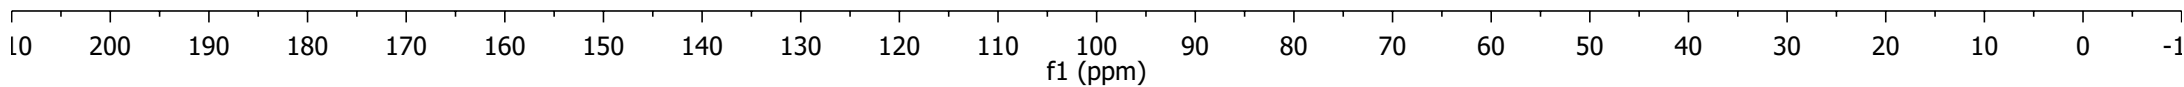

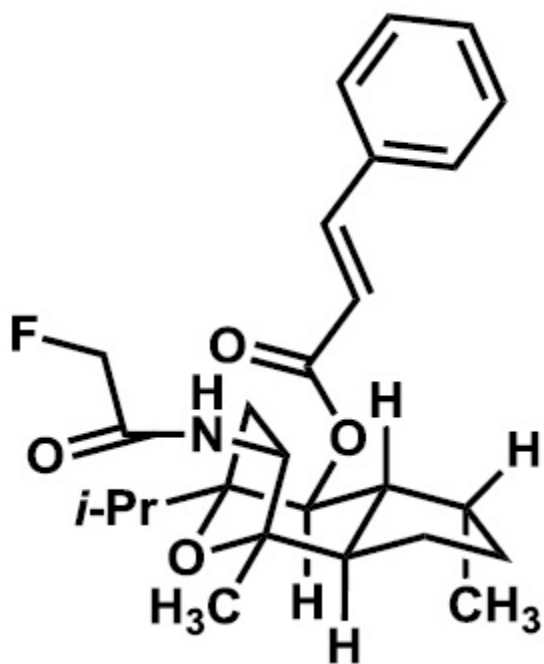

**20**  
**(NSC#777412)**

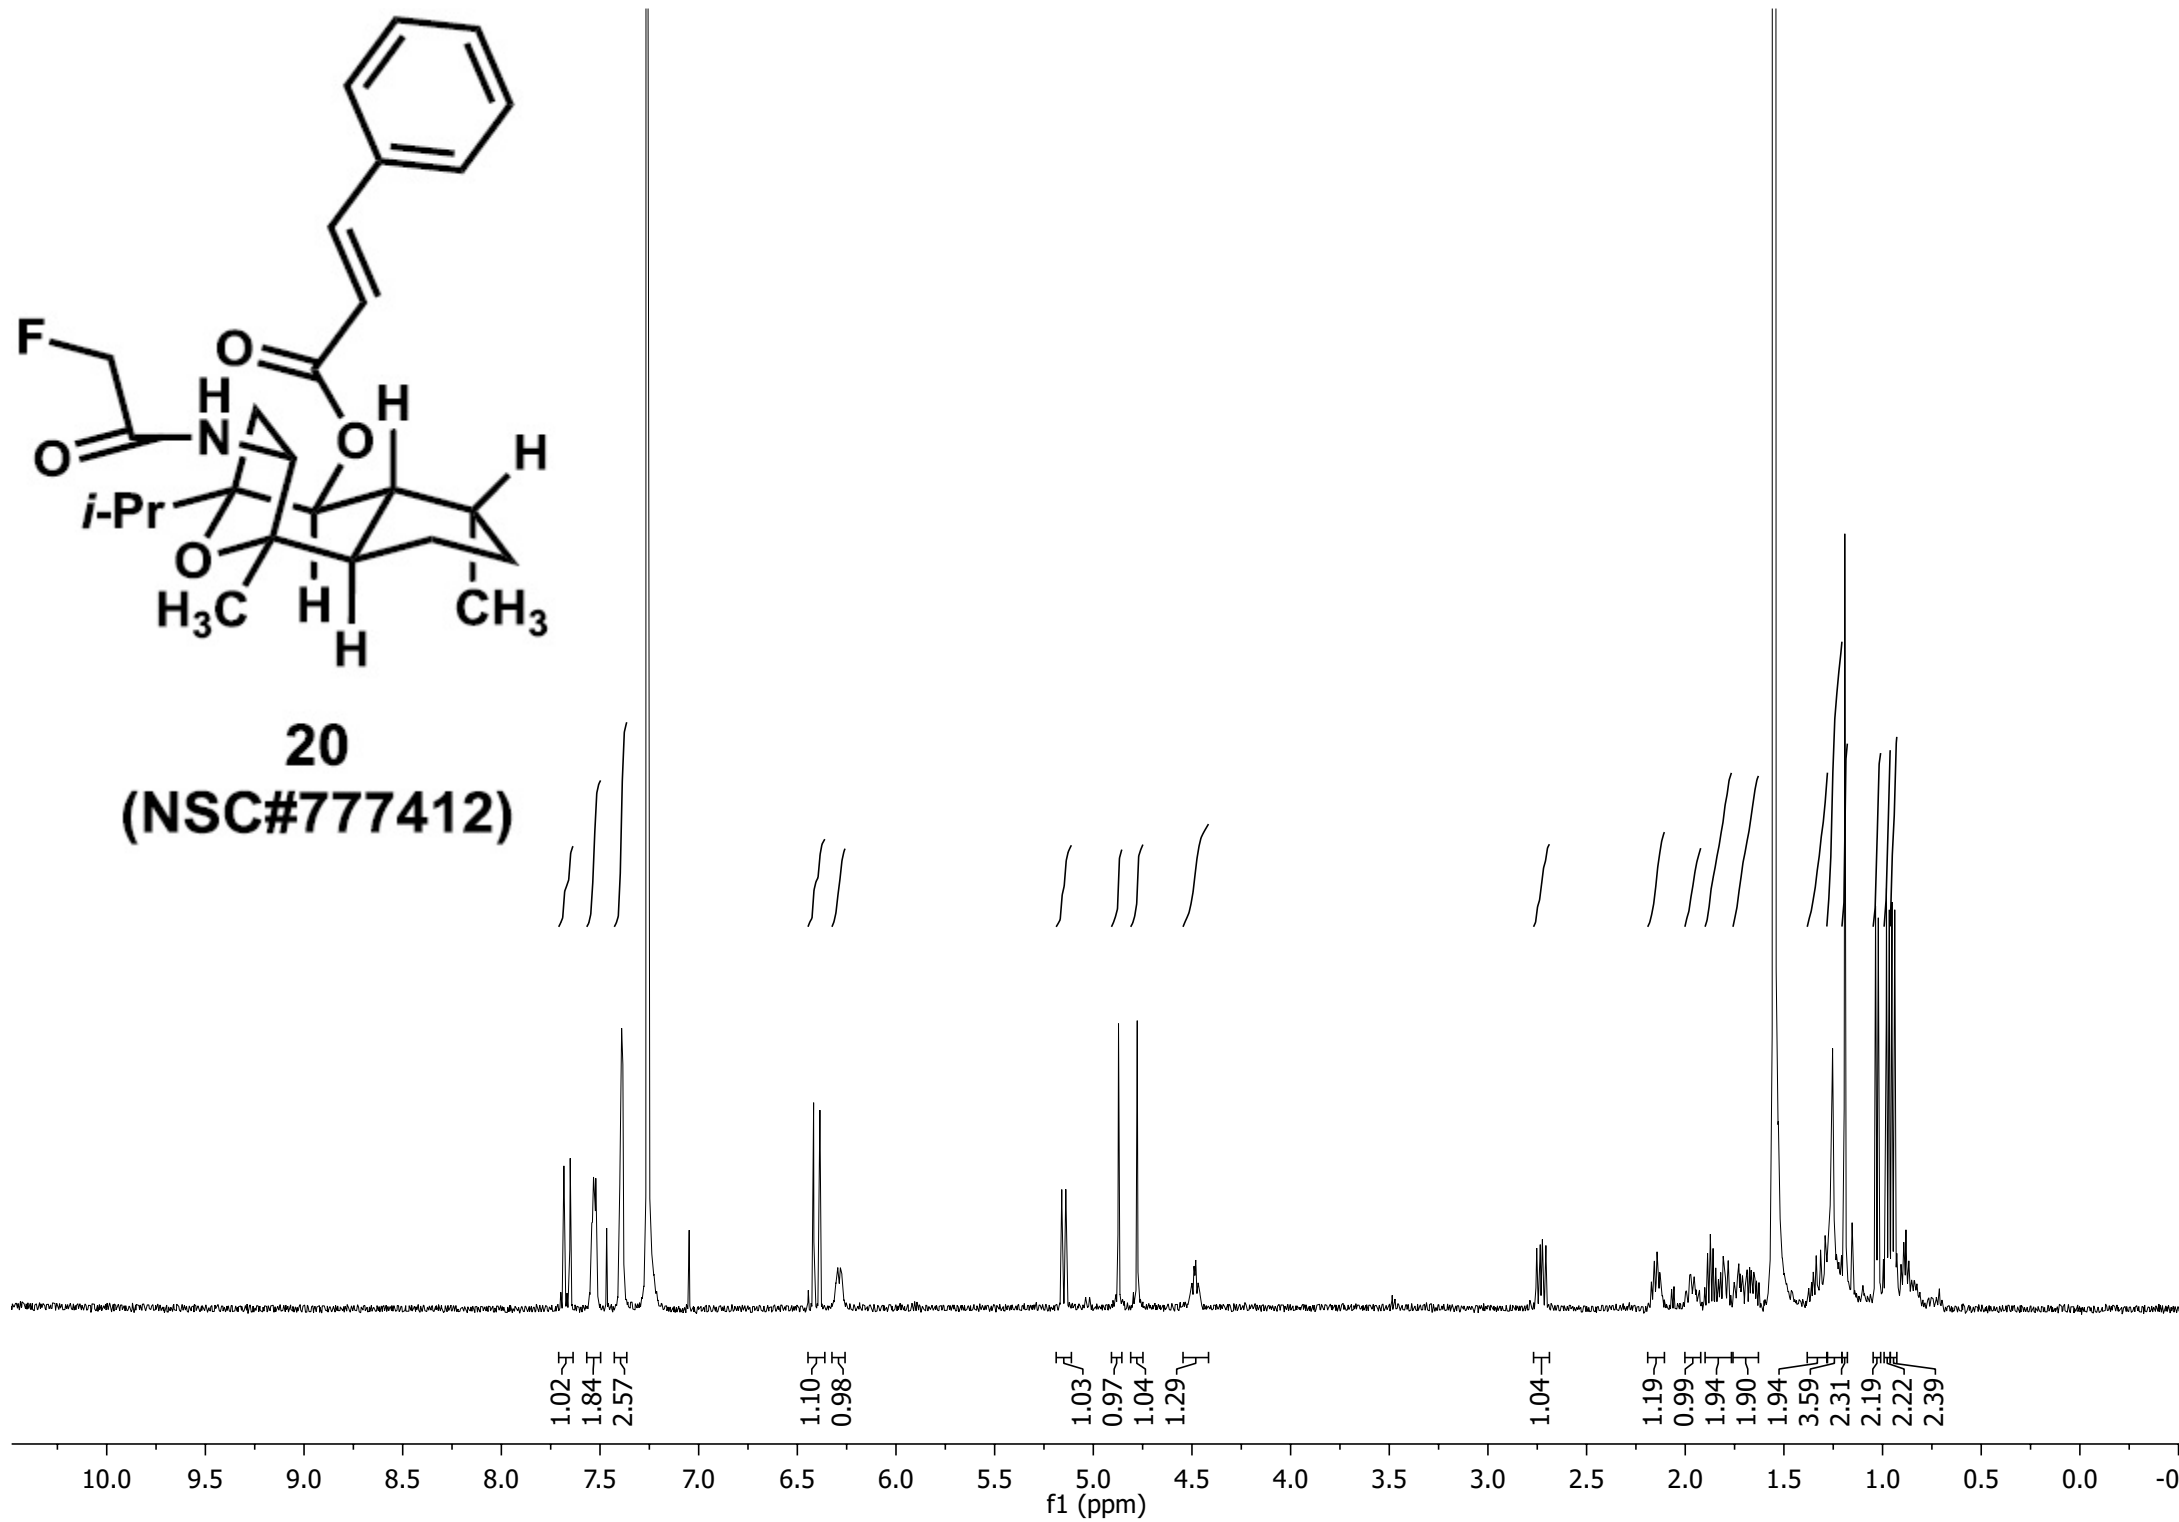

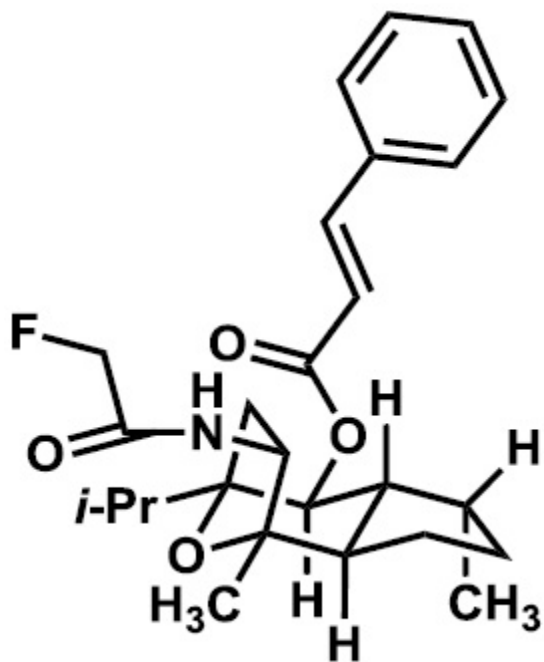

**20**  
**(NSC#777412)**

166.9  
166.7  
165.8

145.4

134.4

130.6

129.0

128.3

118.1

85.3

84.8

81.2

79.4

71.5

50.8

48.3

46.9

40.9

33.4

31.3

31.1

29.5

24.7

22.9

20.1

18.4

17.6

17.1

200 190 180 170 160 150 140 130 120 110 100 90 80 70 60 50 40 30 20 10 0 -1  
f1 (ppm)



**20**  
**(NSC#777412)**

182.2  
182.6

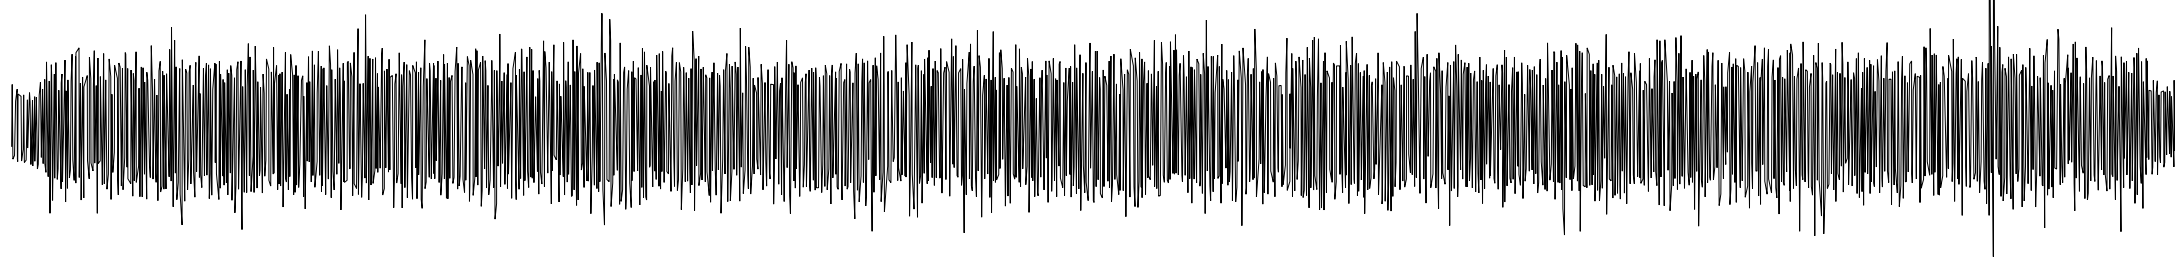

f1 (ppm)

C-S62

## **Formulations**

### **Parenteral Formulation**

Vehicle Ingredients were ethanol, propylene glycol (PG), PEG 400, hydroxypropyl  $\beta$ -cyclodextrin (HPBCD, 8% w/v in H<sub>2</sub>O). All vehicle ingredients were purchased from Sigma-Aldrich. A vial containing the dry drug compound (10 mg) was allowed to come to room temperature before proceeding to formulation. 150  $\mu$ l of ethanol was added to the drug vial and mixed thoroughly using a vortex mixer. Next 400  $\mu$ l of PG was added and mixed vigorously using a vortex mixer. Then, 450  $\mu$ l of PEG 400 was added and mixed thoroughly. Last, 450  $\mu$ l of HPBCD (8%) was added and mixed thoroughly. A clear solution with a concentration of 5.7 mg/ml was obtained at the final step.

To prepare dilutions of the reconstituted drug, a solution containing 8% HPBCD in water was used. To prepare the dilution vehicle, 8 g of HPBCD powder was weighed out and added to 100 mL of water. The concentrated formulation was added to the diluent in a dropwise fashion with stirring and made to 20 mL, for a working concentration of 0.5 mg/mL. The solution was then sterile filtered using an 0.2  $\mu$  Acrodisc (Pall) filter into a 20 mL sterile serum vial.

The 5.7 mg/ml solution of reconstituted drug was stable for over one week at 4°C. Drug dilutions prepared from the 5.7 mg/ml solution of reconstituted drug were also found to be stable for one week.

### **Oral Formulation**

The dry compound was dissolved directly in Labrasol™ at a concentration of 20 mg/mL. The preparation was administered by gavage.

### **HPLC-MS/MS Assay for Englerins**

This method was developed for mouse or rat plasma. The calibration range was 5-500 ng/mL. Lorazepam was used as an internal standard. UPLC was performed using a Waters Acquity

binary pump. Mobile Phase A1: 0.5% formic acid (aq), Mobile Phase B1: 0.5% formic acid in Acetonitrile, Mobile Phase A2: (90/10) water/CAN, Mobile Phase B2: CAN, Strong Needle Wash: 0.1% formic acid in CAN, Weak Needle Wash/Seal Wash: (80/20) water/CAN. Solvent programming started at 70% A for 0.40 min, with a linear gradient to 20% A at 0.55 min, isocratic until 1.50 min, and return to initial conditions at 1.70 min. Total run time was 2.0 minutes. Retention times were Aza-Englerin (**2**) 1.22 min, internal standard 0.97 min, flow rate 0.5 ml/min, injection volume 10  $\mu$ L. The column was a Waters Acquity UPLC<sup>®</sup> BEH C18 1.7  $\mu$ m, 2.1x50mm column + guard column, column compartment temperature was 30°C.

#### **Mass Spectrometry Conditions:**

Ion Spray Voltage 5500 V, Source Temp 400°C, GS1/GS2: 60/50, Declustering Potential (DP) 35, Entrance Potential (EP) 8, Collision Energy (CE) 25, Collision Exit Potential (CXP) 14, Dwell Times 200 msec, MRM 1 for aza-englerin (**2**)  $m/z$  442.2  $\rightarrow$  219.1 (CE=21), MRM 2 for lorazepam (IS)  $m/z$  321.0  $\rightarrow$  275.0 (CE=15).

#### **Stock solutions**

Aza-englerin master stock was prepared by adding 1.0 mg of **2** film to 1 mL of ACN to make a 1 mg/mL master stock and stored at -80°C. Lorazepam (IS) master stock was prepared by adding 2 mL of ethanol to a 1 mg vial make a 0.5 mg/mL solution, which was stored at -80°C.

#### **Internal Standard Working Solutions**

40  $\mu$ L of 0.5 mg/mL lorazepam (LZP) master stock was mixed with 960  $\mu$ L of ACN to make a 20  $\mu$ g/mL solution. 50  $\mu$ L of 20  $\mu$ g/mL LZP was added to 100 mL of ACN to make 10 ng/mL LZP in 0.1% Formic acid /ACN.

#### **Sample Preparation**

Plasma samples were defrosted, vortexed for 15 sec, then kept on ice. To 100  $\mu$ L of the thawed experimental sample, was added 100  $\mu$ L of IS solution in a microcentrifuge tube, then 1 mL CAN, was added, the tube was capped and vortexed for 5 sec. The tubes were then centrifuged for 5 minutes at 13,000 rpm in a mini centrifuge @ 4 °C. Approximately 850  $\mu$ L of supernatant was transferred into a 96-well collection plate, which was then dried under desiccated air in a TurboVap 96 (40 C plate temp; <50 Fh). The sample was reconstituted with 100  $\mu$ L of (50/50) ACN/H<sub>2</sub>O added directly into the plate, which was vortexed thoroughly while covered with parafilm. The plate was inserted directly into Waters ACQUITY UPLC autosampler tray.

The original ultra-high performance liquid chromatography with tandem mass spectrometric detection (uHPLC-MS/MS) assay for englerin A (**1**) was modified in order to measure the N-substituted analogue (**2**). First, **1** has a molecular weight of 442 and gave a protonated molecular cation detected in the mass spectrometer at  $m/z$  443.2. This intact cation was then fragmented and the predominant product cation was observed at  $m/z$  201.2. In order to maximize this signal in the mass spectrometer, several instrument parameters were tuned for optimal signal performance, including the ion spray voltage (5500 V), TurboIon<sup>®</sup> source temperature (400 °C), declustering potential (70 V), entrance potential (10 V), collision energy (25 V), and the collision cell exit potential (12 V). Additionally, **1** was chromatographically separated from matrix contaminants remaining in the organic solvent extract (with acetonitrile) through the use of a bridged-ethylene hybrid bead-containing uHPLC column with an octadecyl carbon moiety (C18; 2.1x50mm, 1.7µm particle size). The mobile phase consisted of (70/30, v/v) 0.5% formic acid(aq)/0.5% formic acid in acetonitrile that was ramped up to (20/80, v/v) over the course of 30 seconds and held there for an additional minute to solvate and elute the injected **1** that partitioned into the C18 stationary phase. The eluted **1** then entered the mass spectrometer at 1.40 min post injection.

To accommodate measurement of the aza analogue (**2**), the mass spectrometer was tuned for optimal signal performance on the molecular cation observed at  $m/z$  442.2, and the subsequent predominant product cation observed at  $m/z$  219.1. Several tuning parameters changed as a result of the different ions being measured: declustering potential (35 V), entrance potential (13 V), collision energy (19 V), and the collision cell exit potential (10 V). The chromatographic scheme for the **2** was identical to EA, however the aza-analogue eluted from the column and entered the mass spectrometer at 1.22 min.

### Oral Bioavailability Studies

Mice were dosed at 5 mg/kg, 10 mg/kg, 50 mg/kg, and 100 mg/kg compound **2** in Labrasol vehicle via oral gavage. 30 minutes after dosing, plasma was assayed for the concentration of compound **2** using LC-MS. The results are depicted graphically in Figure S1. As is apparent from the results shown in Figure S1, compound **2** was found in plasma concentrations up to approximately 700 ng/mL after dosing at 100 mg/kg.

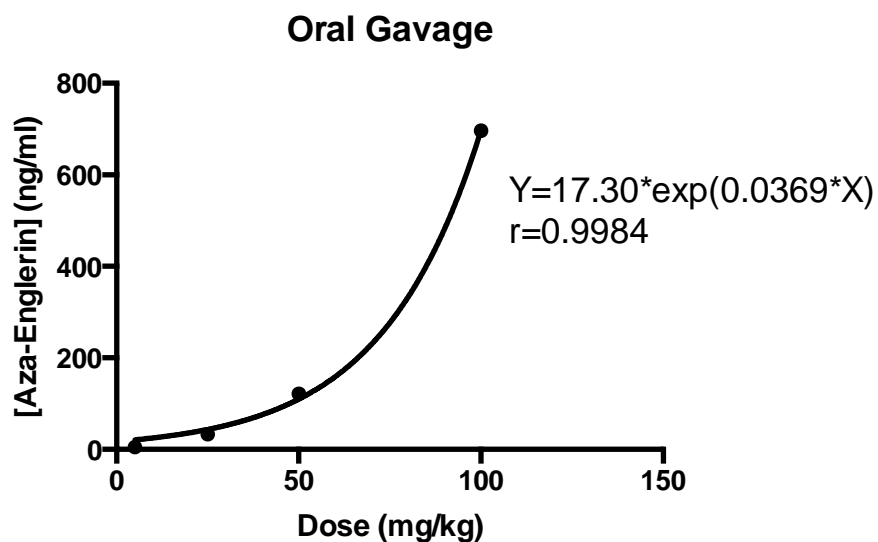

**Figure S1.** Nonlinear increase in plasma concentrations of **2** 30 min after dosing.

In a second experiment, ten mice were administered 20 mg/kg of compound **2** in Labrasol vehicle via oral gavage. Two mice at a time were sacrificed at the 5 min, 15 min, 1 h, 4 h, and 8 h. Plasma concentrations of compound **2** were measured by LC-MS/MS, and the results set forth in Table S1 and depicted graphically in Figure 1.

Table S1.

| Animal | Time (hr) | Concentration of <b>2</b> (ng/mL) | Mean  |
|--------|-----------|-----------------------------------|-------|
| 1      | 0.083     | 6.87                              | 10.04 |
| 2      | 0.083     | 13.20                             |       |
| 3      | 0.25      | 22.76                             | 40.73 |
| 4      | 0.25      | 58.70                             |       |
| 5      | 1.0       | 87.16                             | 73.20 |
| 6      | 1.0       | 59.24                             |       |
| 7      | 4.0       | 31.12                             | 58.97 |
| 8      | 4.0       | 86.81                             |       |
| 9      | 8.0       | 87.28                             | 67.75 |
| 10     | 8.0       | 48.21                             |       |

The AUC<sub>LAST</sub> was calculated as 524.4 hr\*ng/mL (SE=97.3 hr\*ng/mL). As is apparent from the results set forth in Table S1 and the graphical results depicted in Figure 1, compound **2** is rapidly absorbed and the plasma concentrations of compound **2** are sustained for greater than 8 h.

A nonlinear, more-than-dose proportional increase in plasma concentrations was observed. It appears that **2** is rapidly absorbed and plasma concentrations sustained for a longer than expected period. The elimination period likely dominates after 8 h and thus beyond the observed period from this experiment. Further pharmacokinetic experiments are needed that measure plasma concentrations out to 24-36 h post dose.

### **NCI 60 Testing**

Samples were tested in the standard National Cancer Institute 60-cell line protocol. The drug exposure was for two days, with an SRB endpoint. First, compounds were tested against all 60 cell lines at a single final concentration of 10  $\mu$ M. Results are shown in Figures S2-S6. They were then separately tested in five 10-fold dilutions, starting with a high concentration of 100  $\mu$ M. The results are depicted as dose-response curves are found in Figures S7 for compound **2**, Figure S8 for compound **17**, Figure S9 for compound **18**, and Figure S10 for compound **19**.

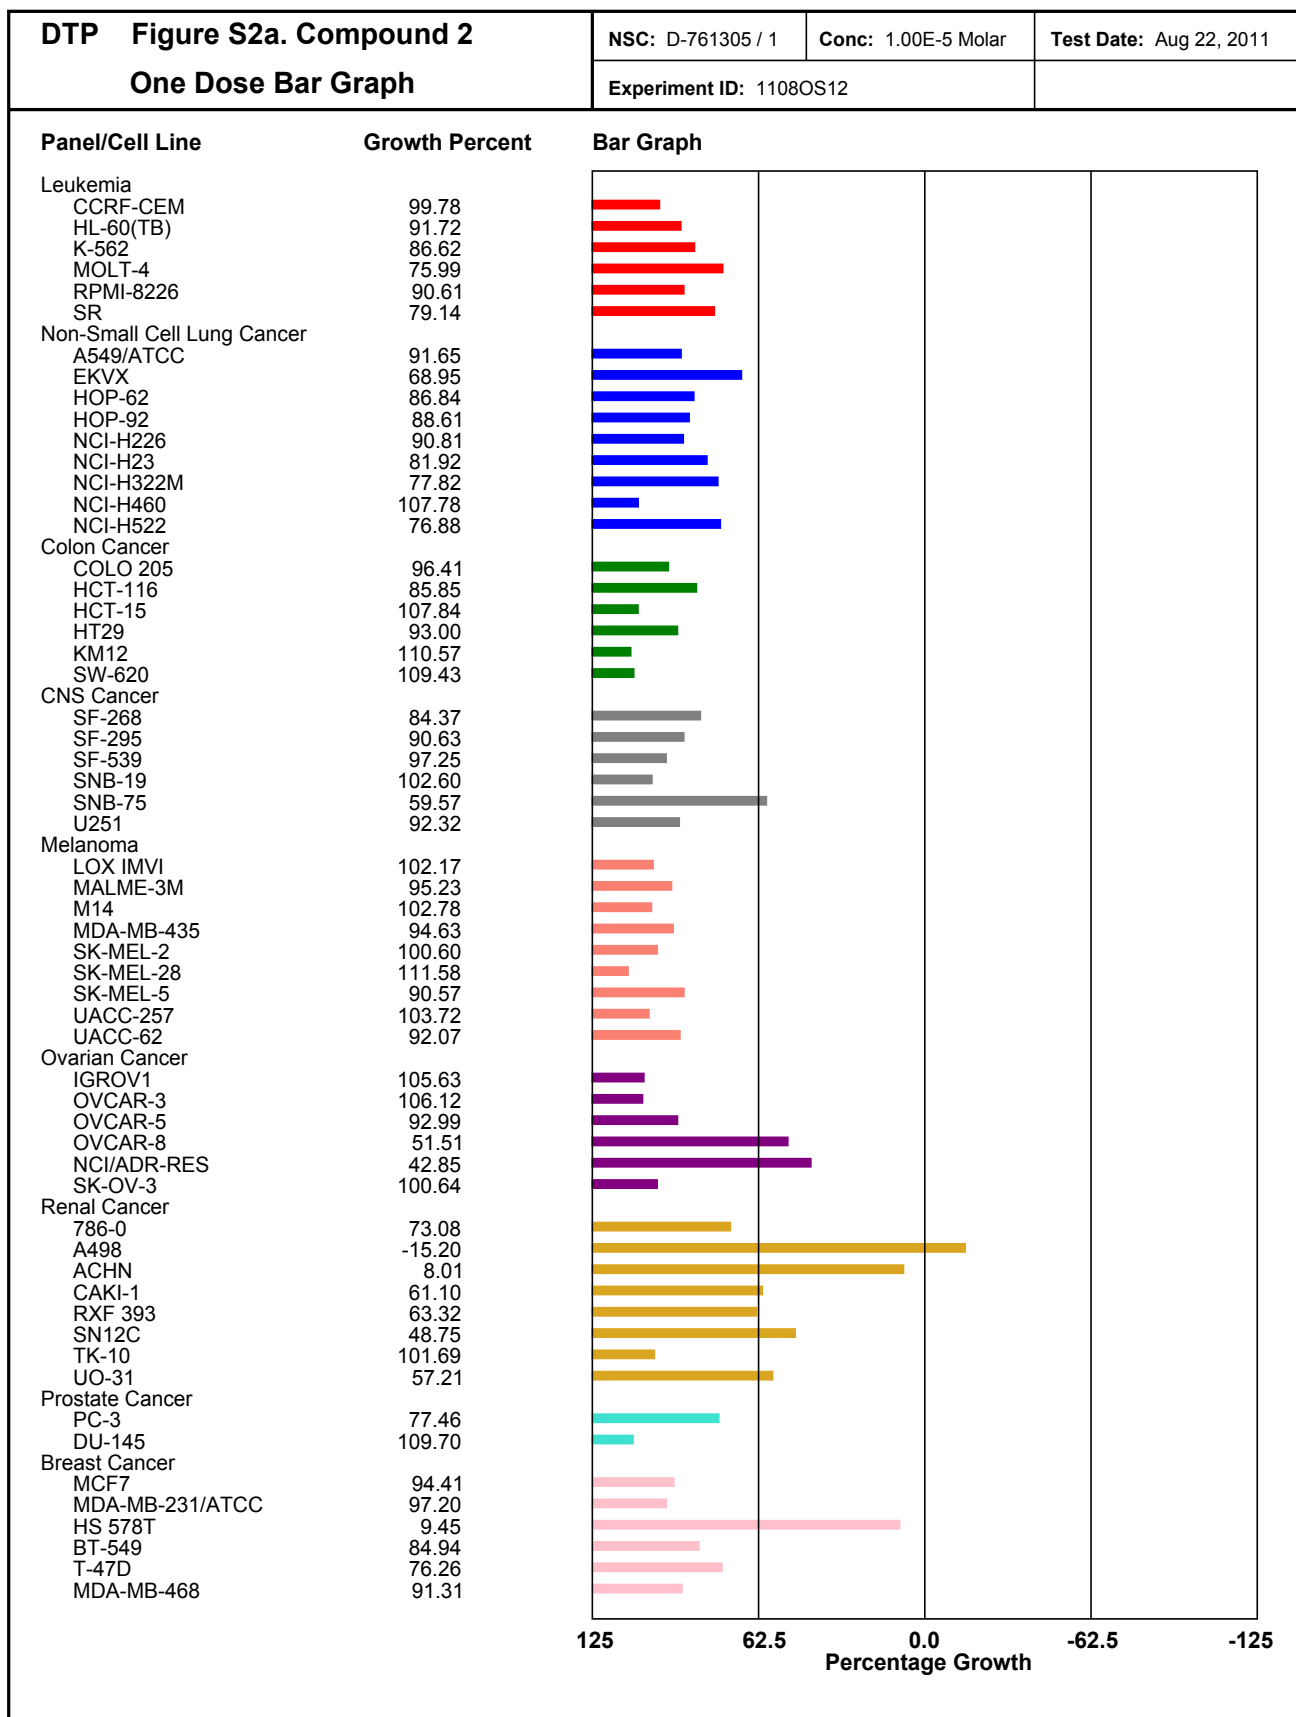

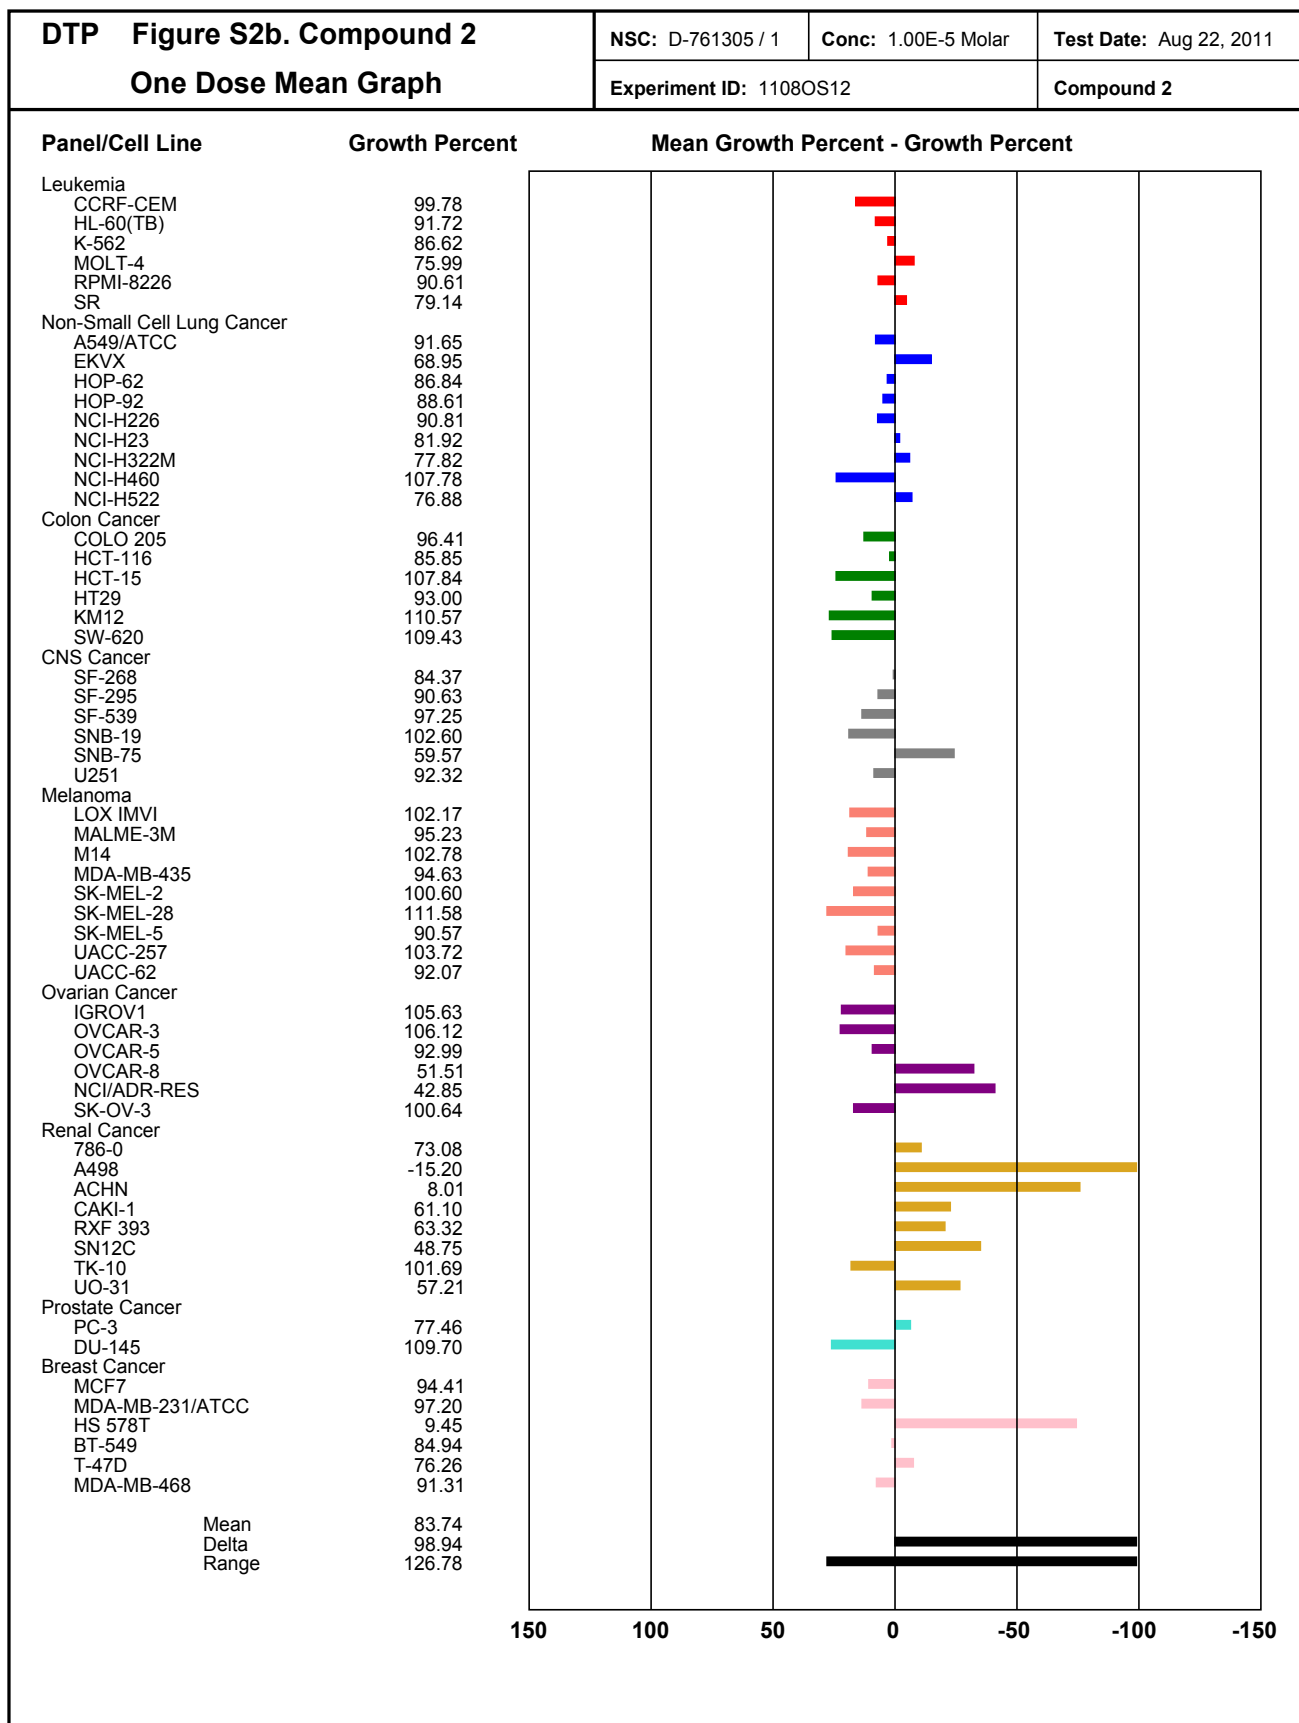

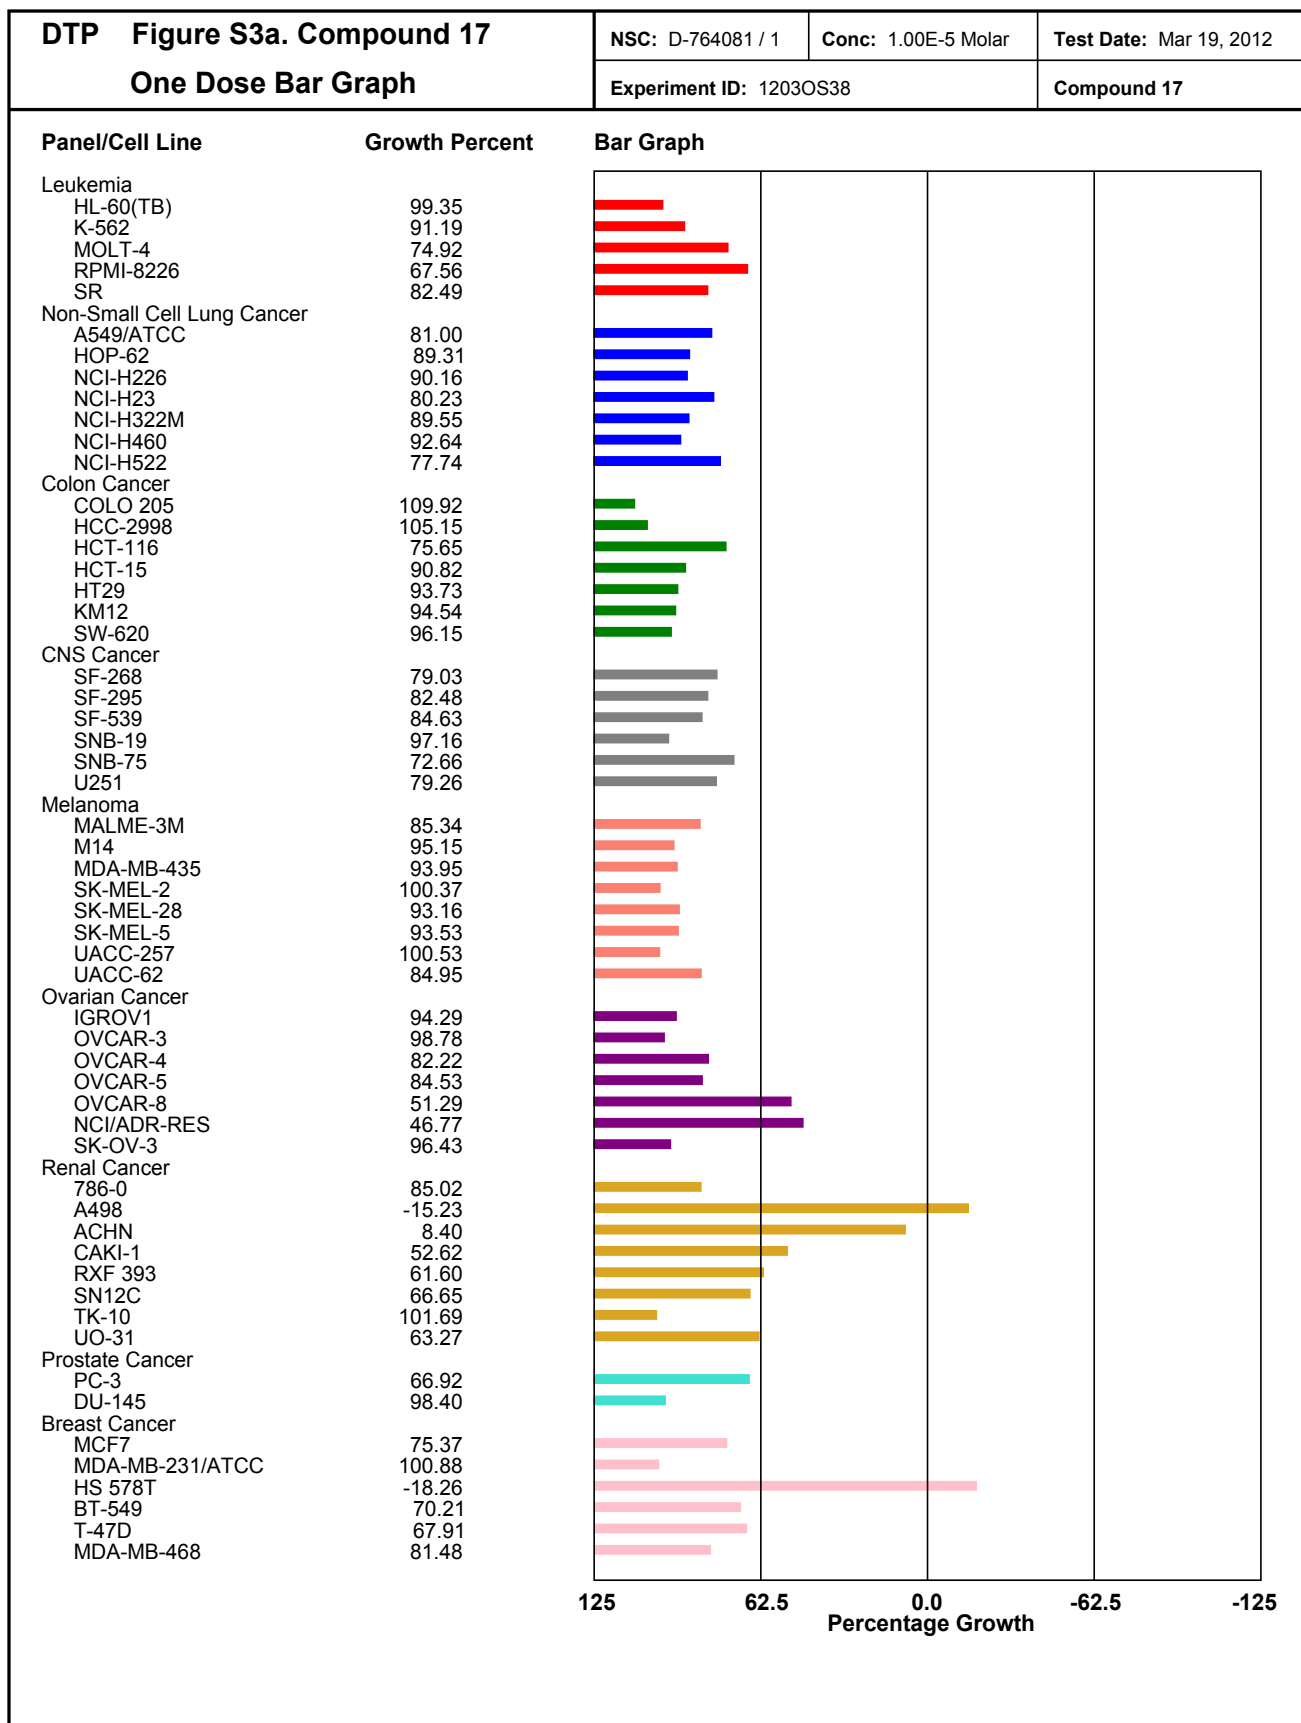

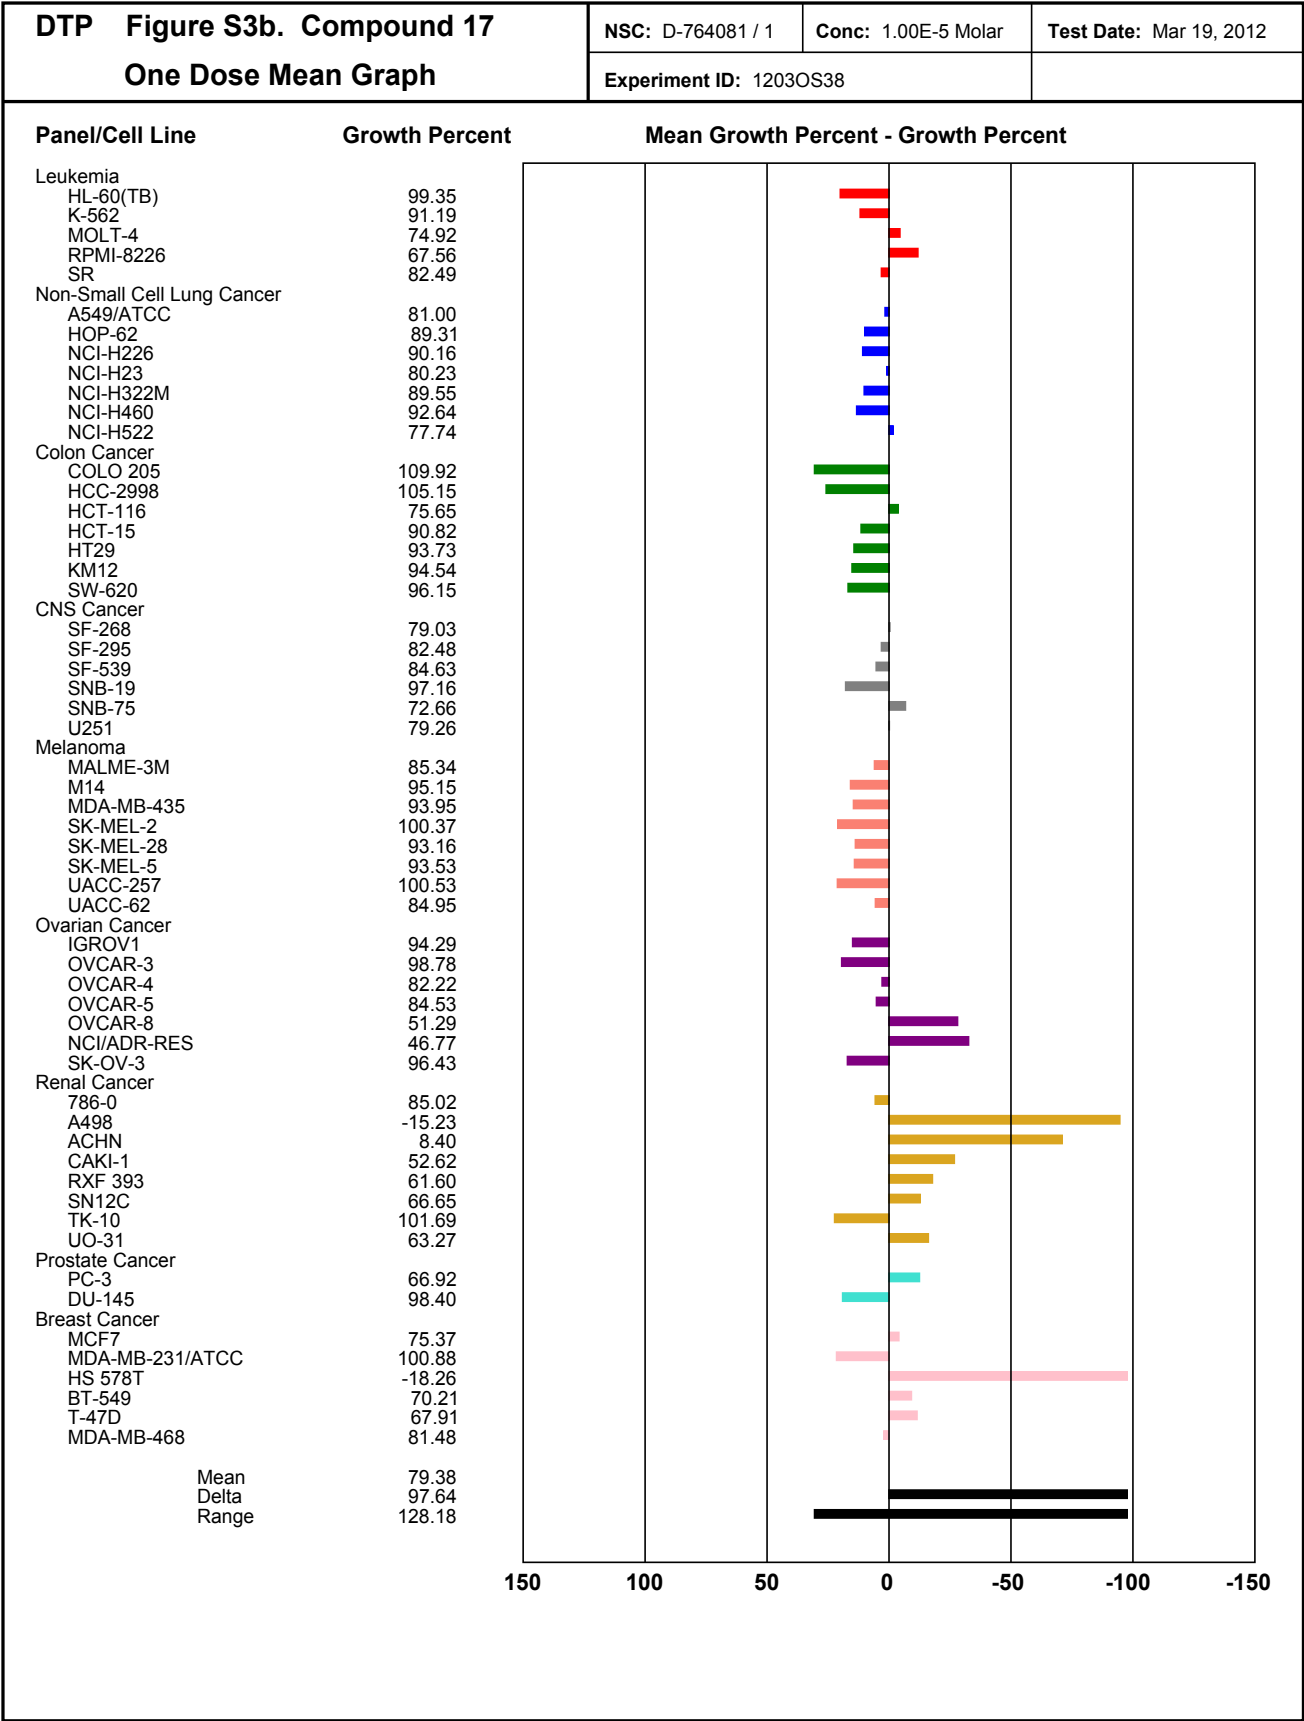

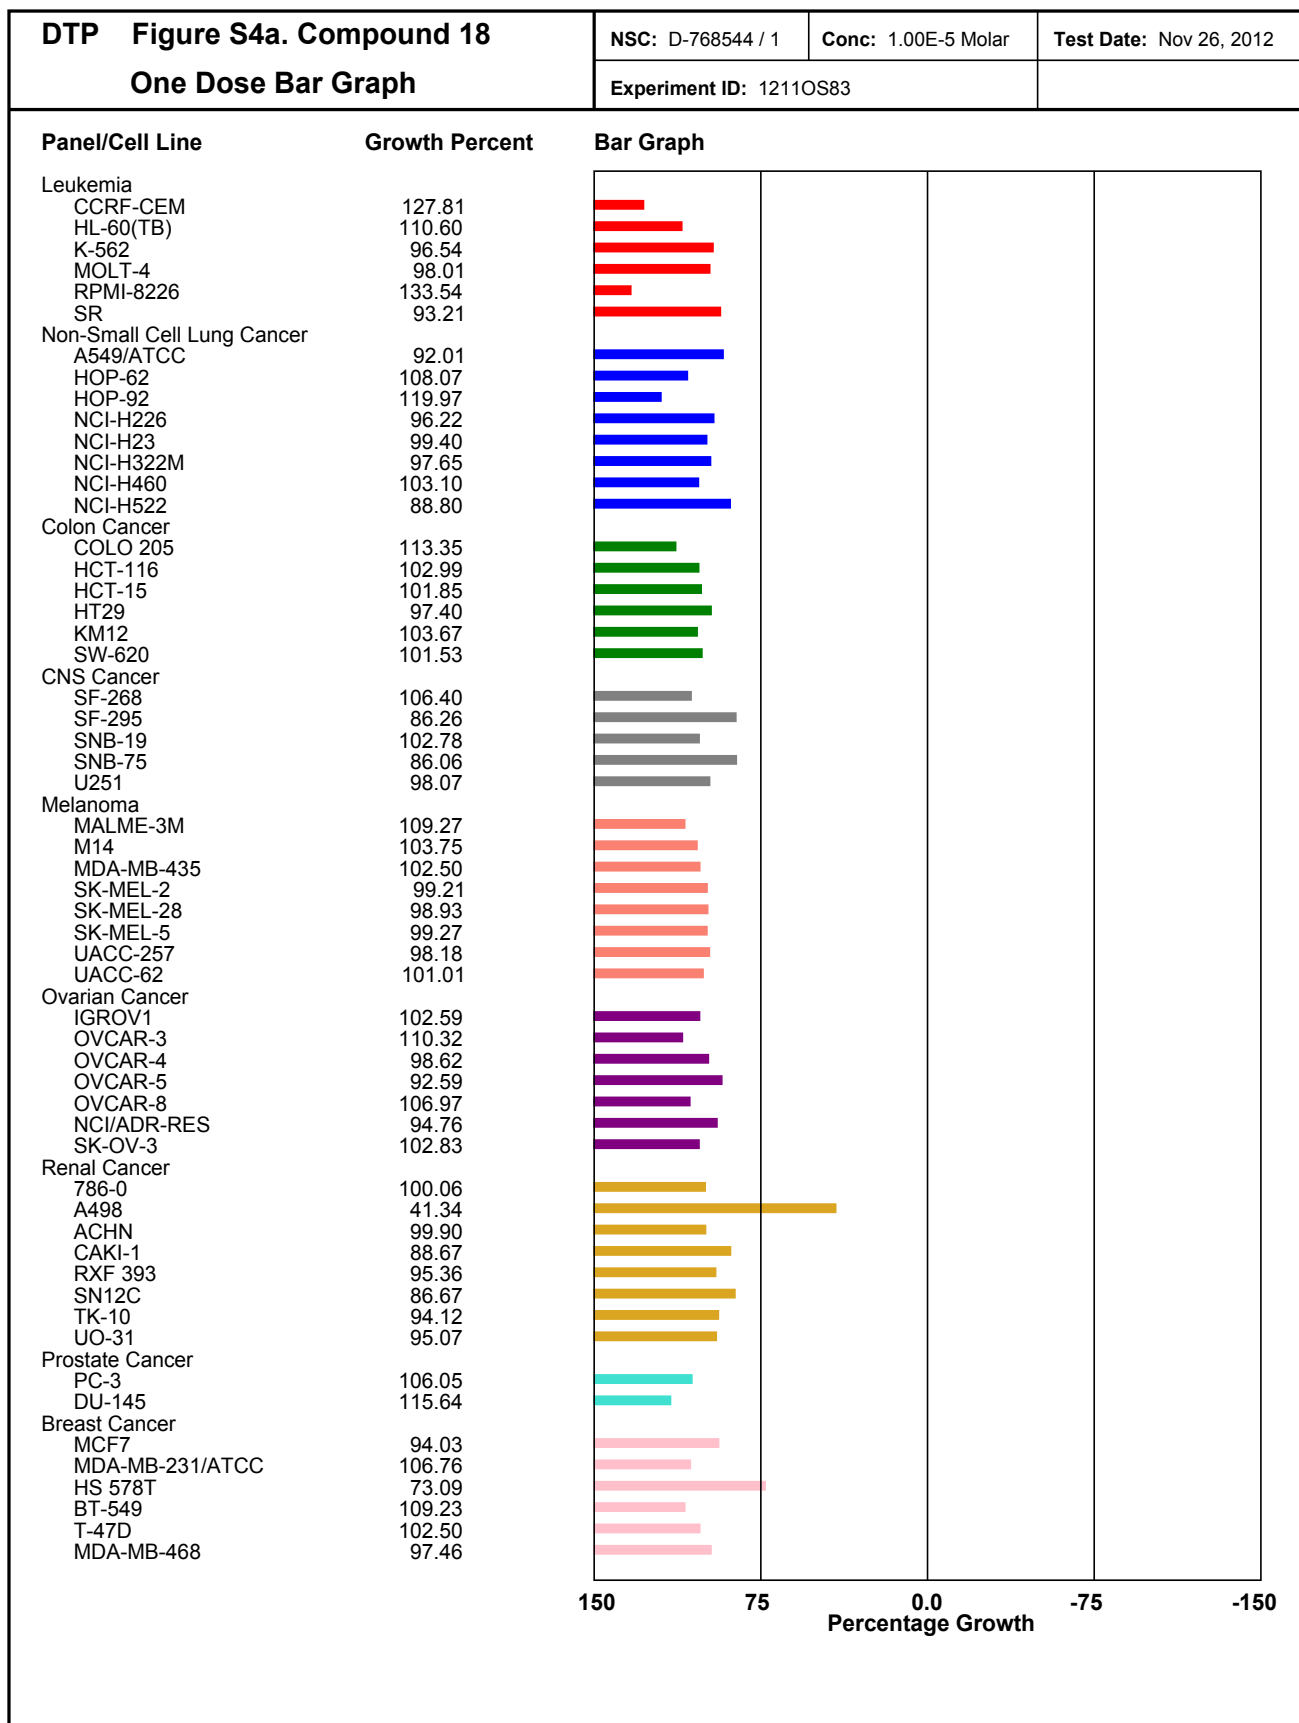

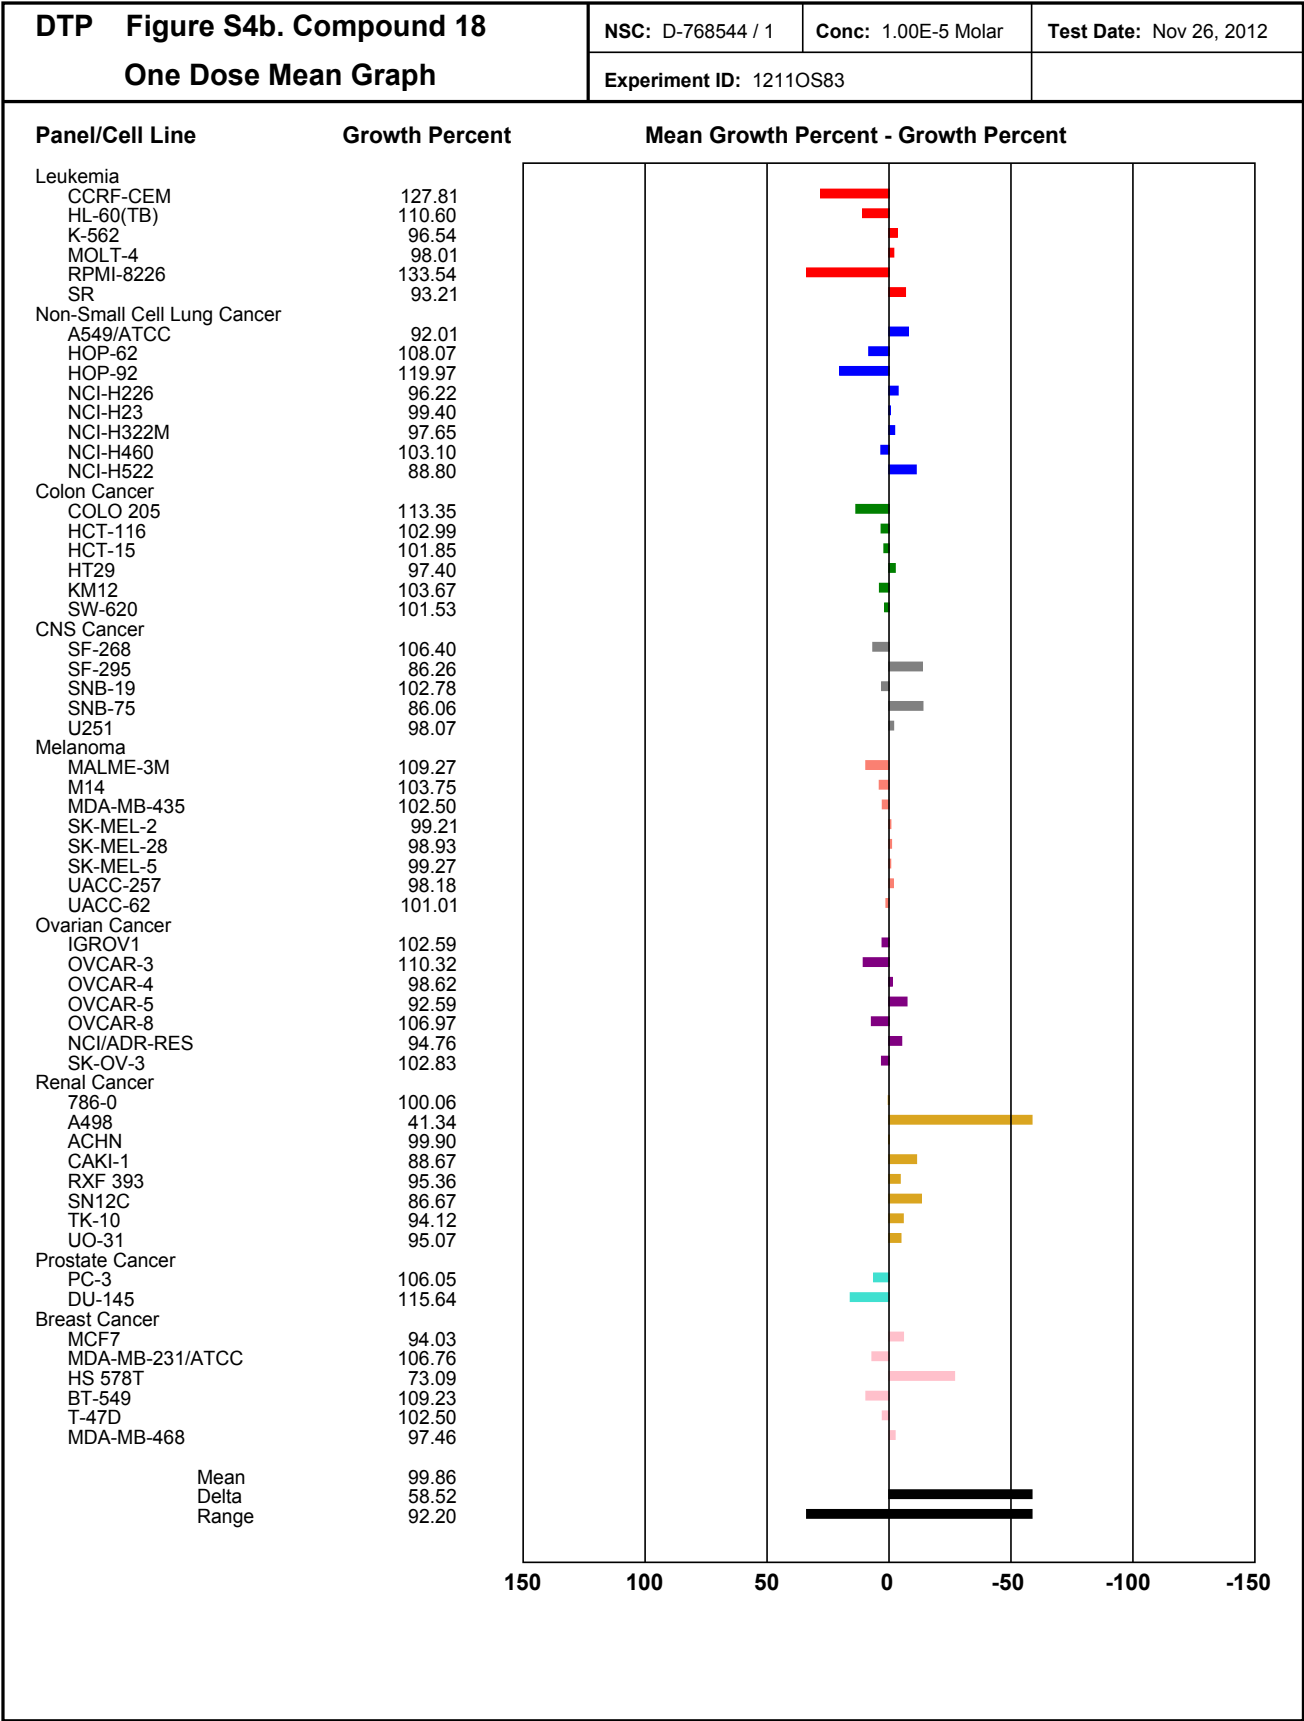

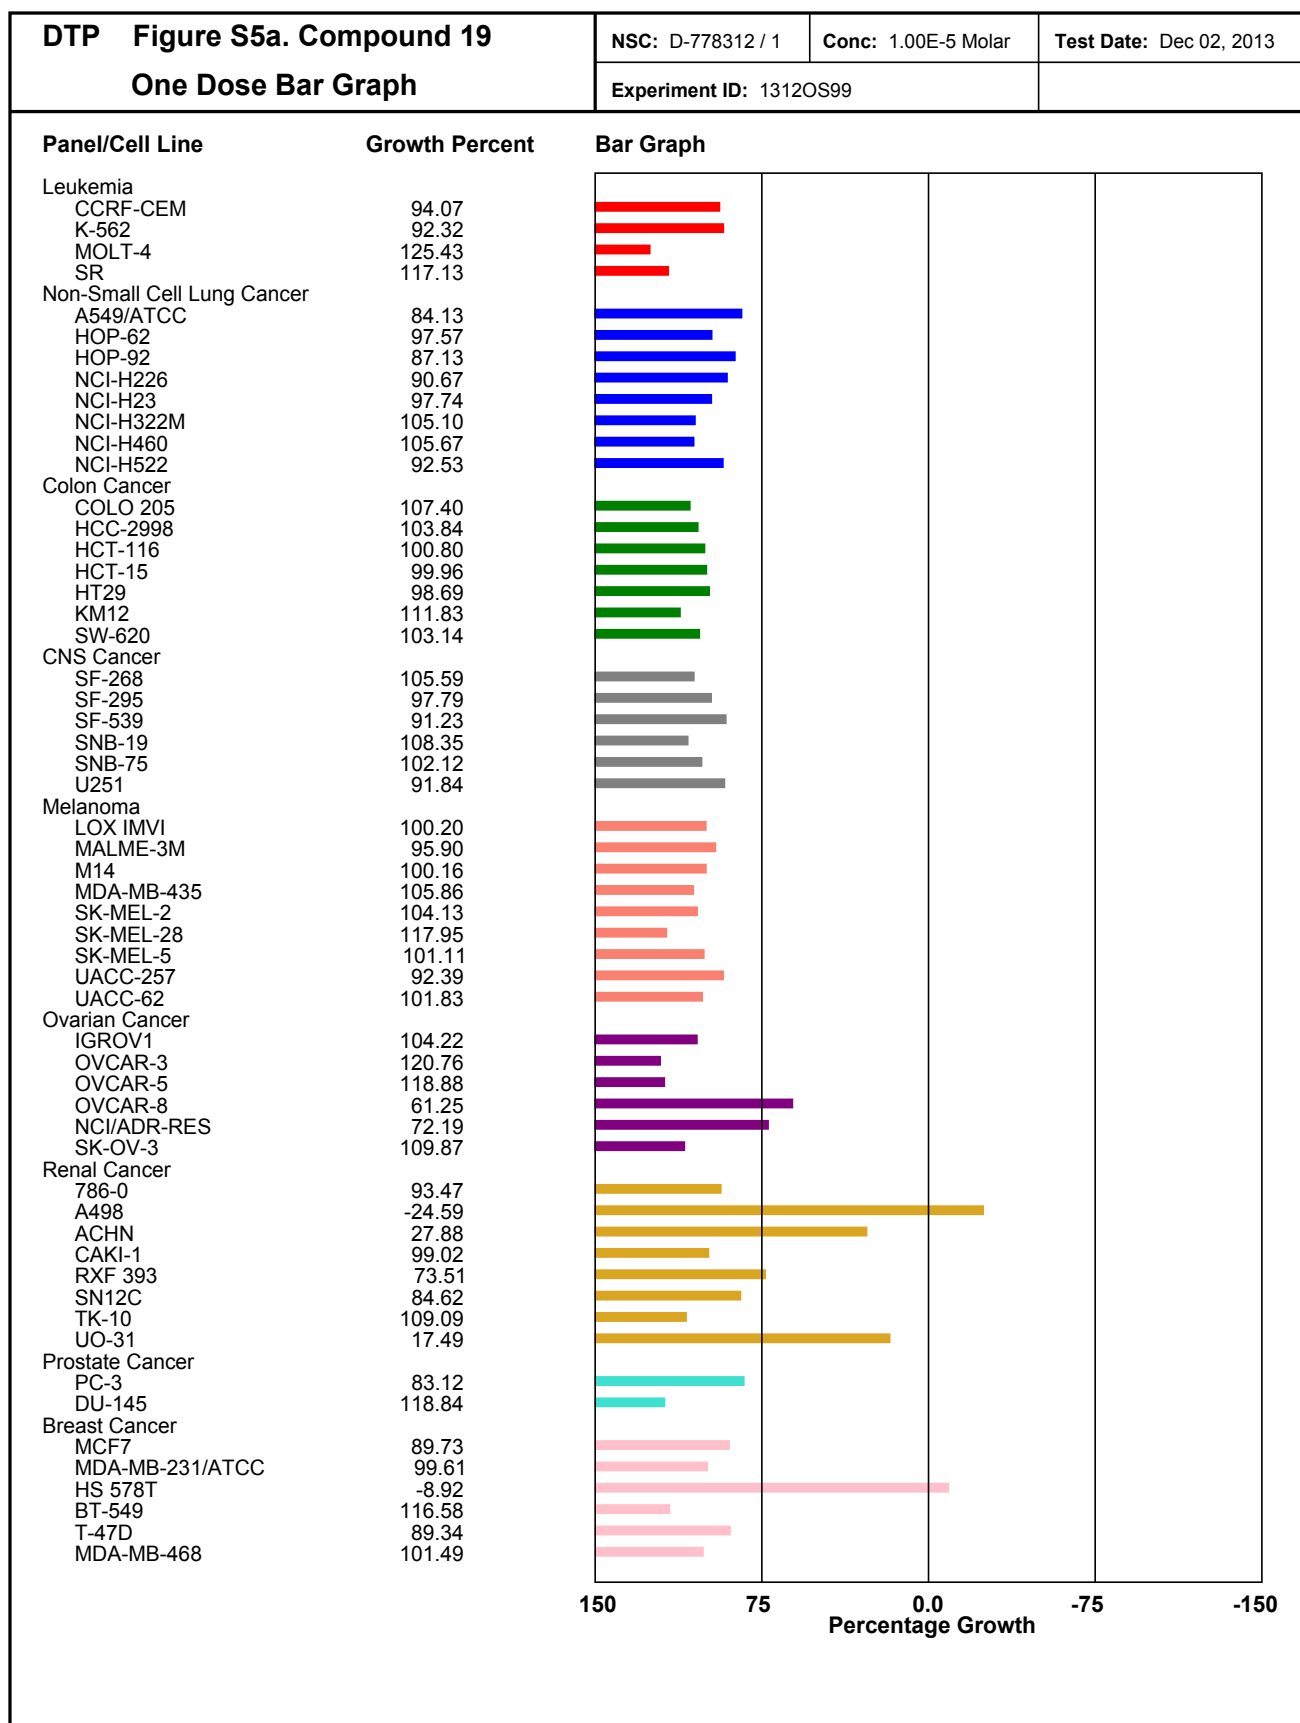

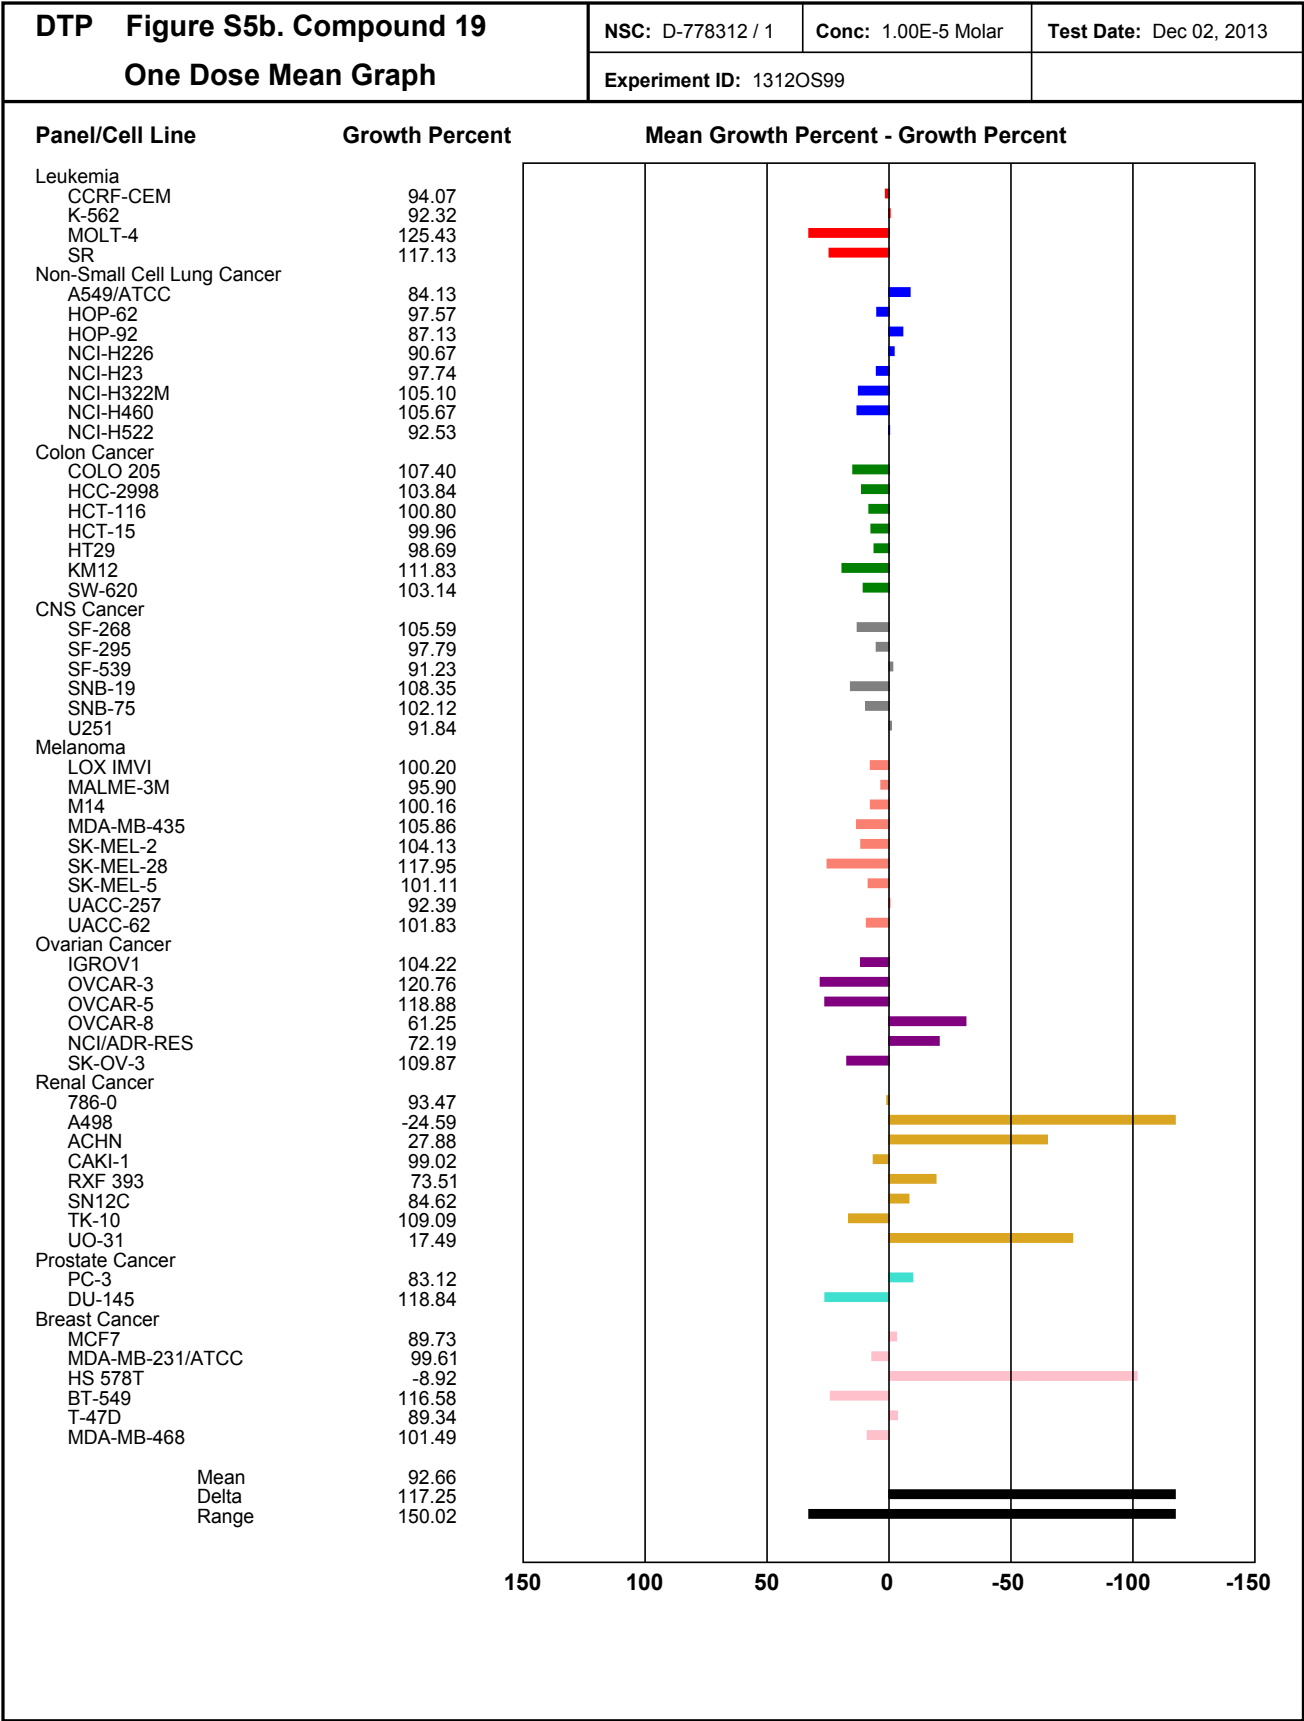

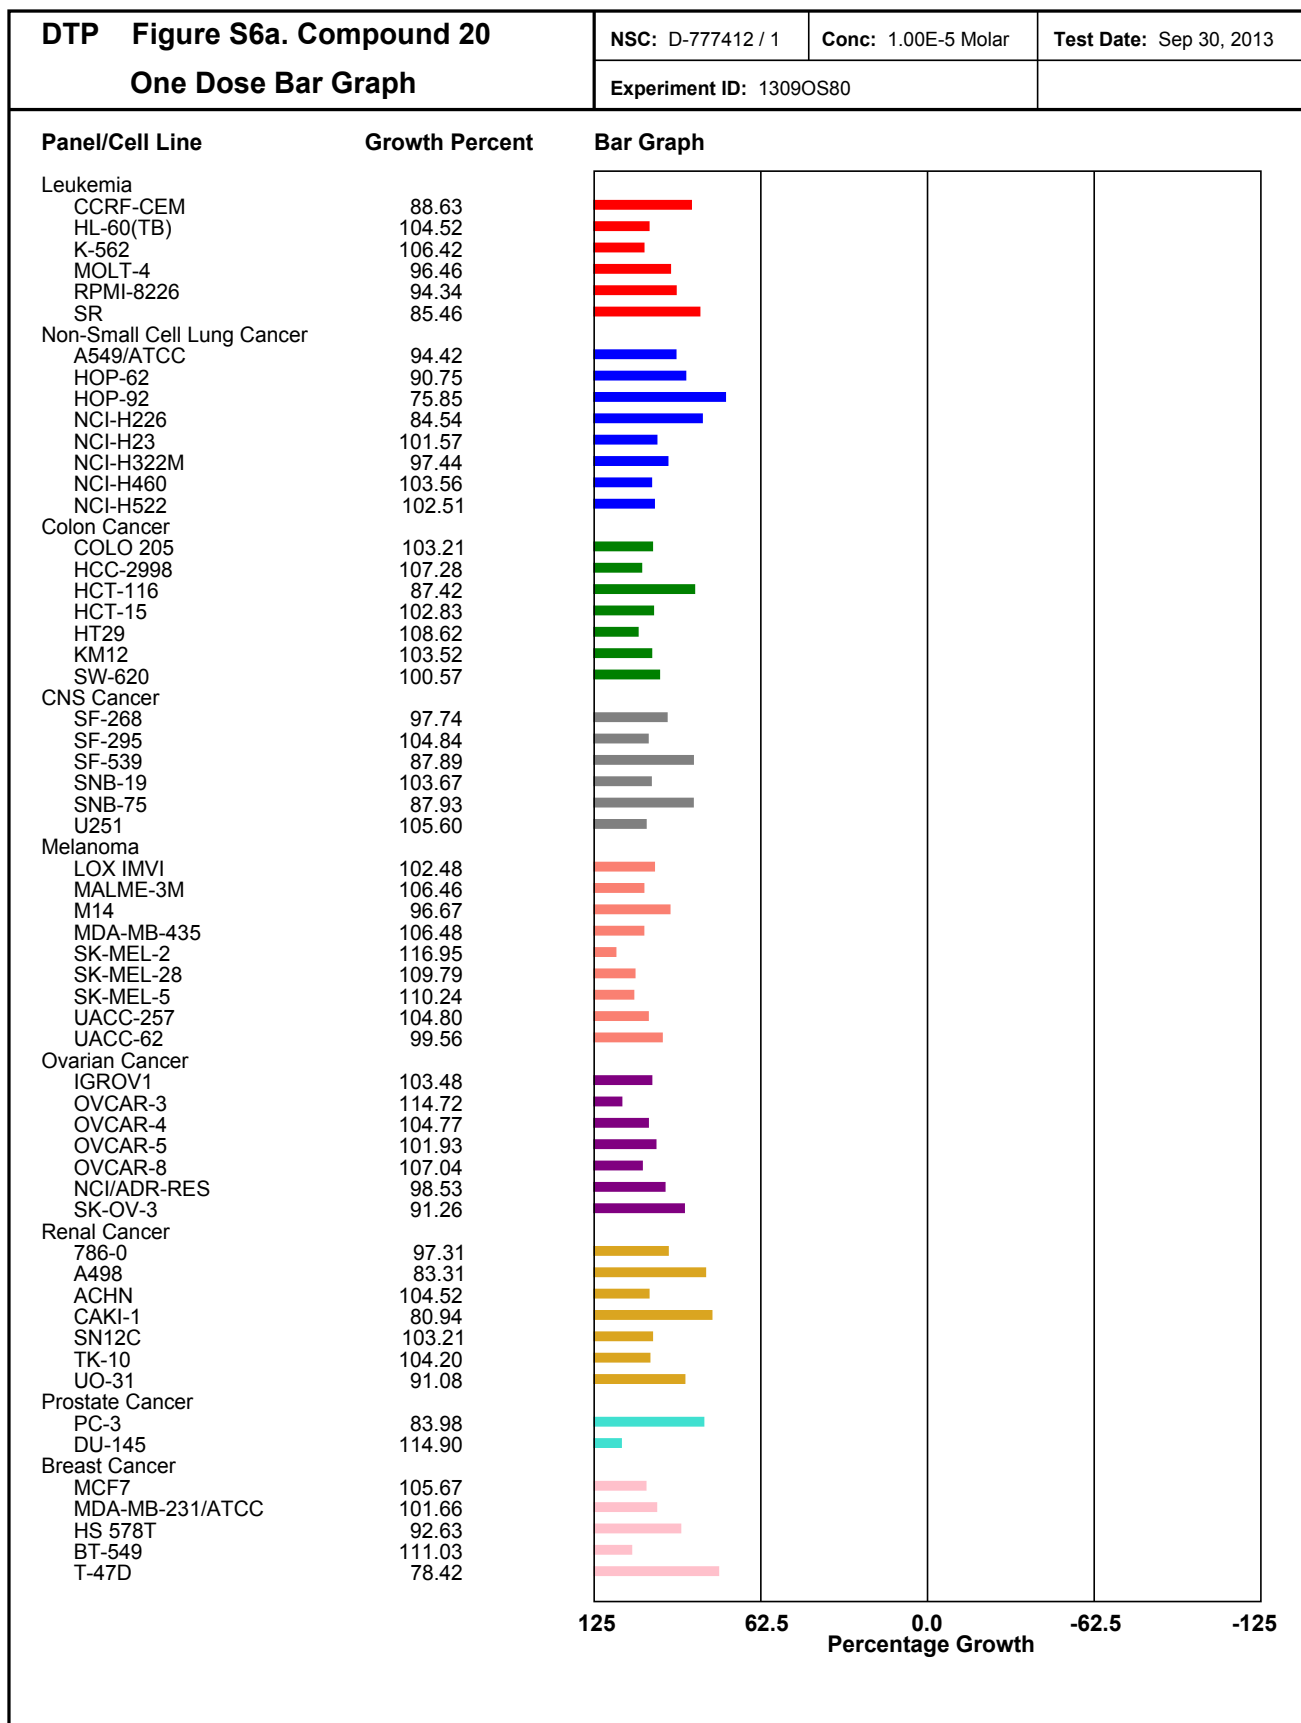

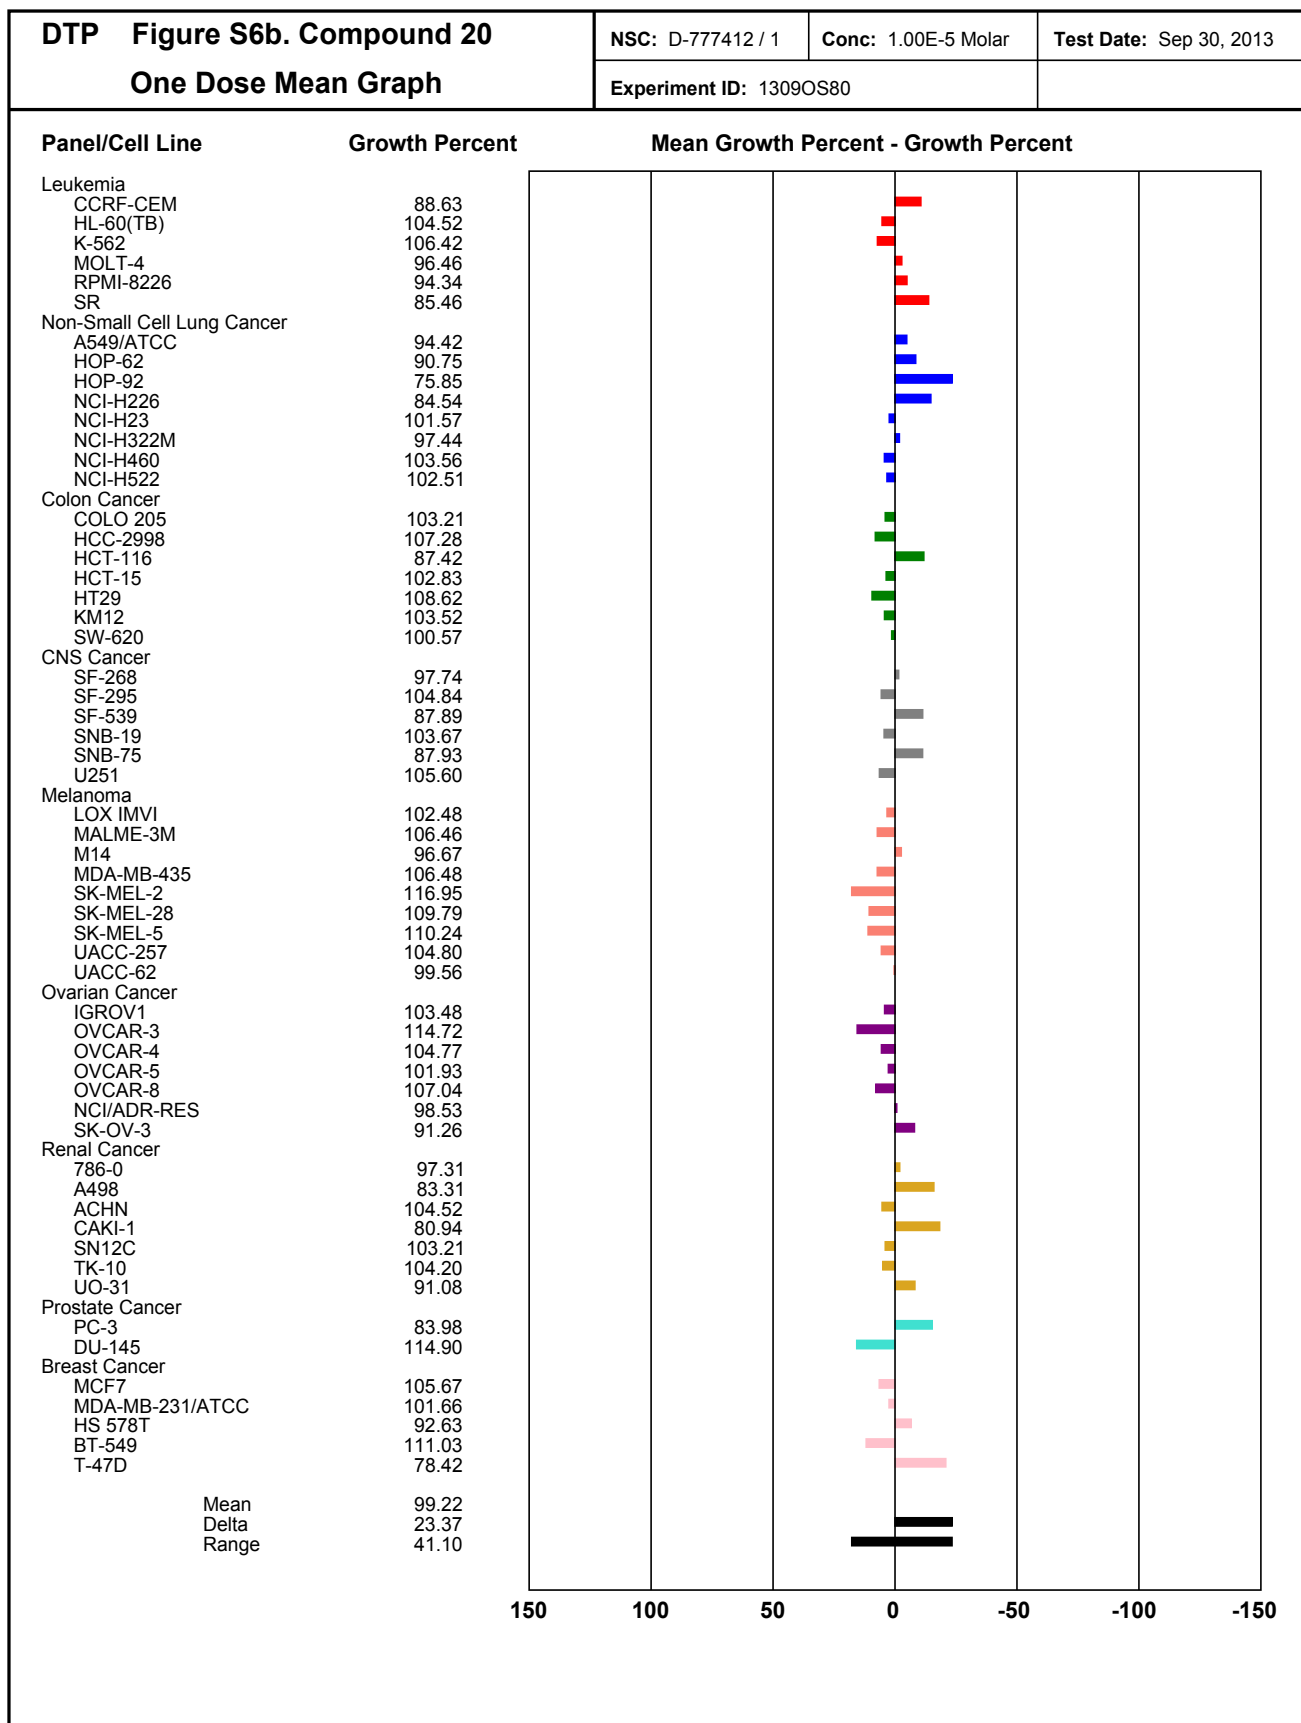

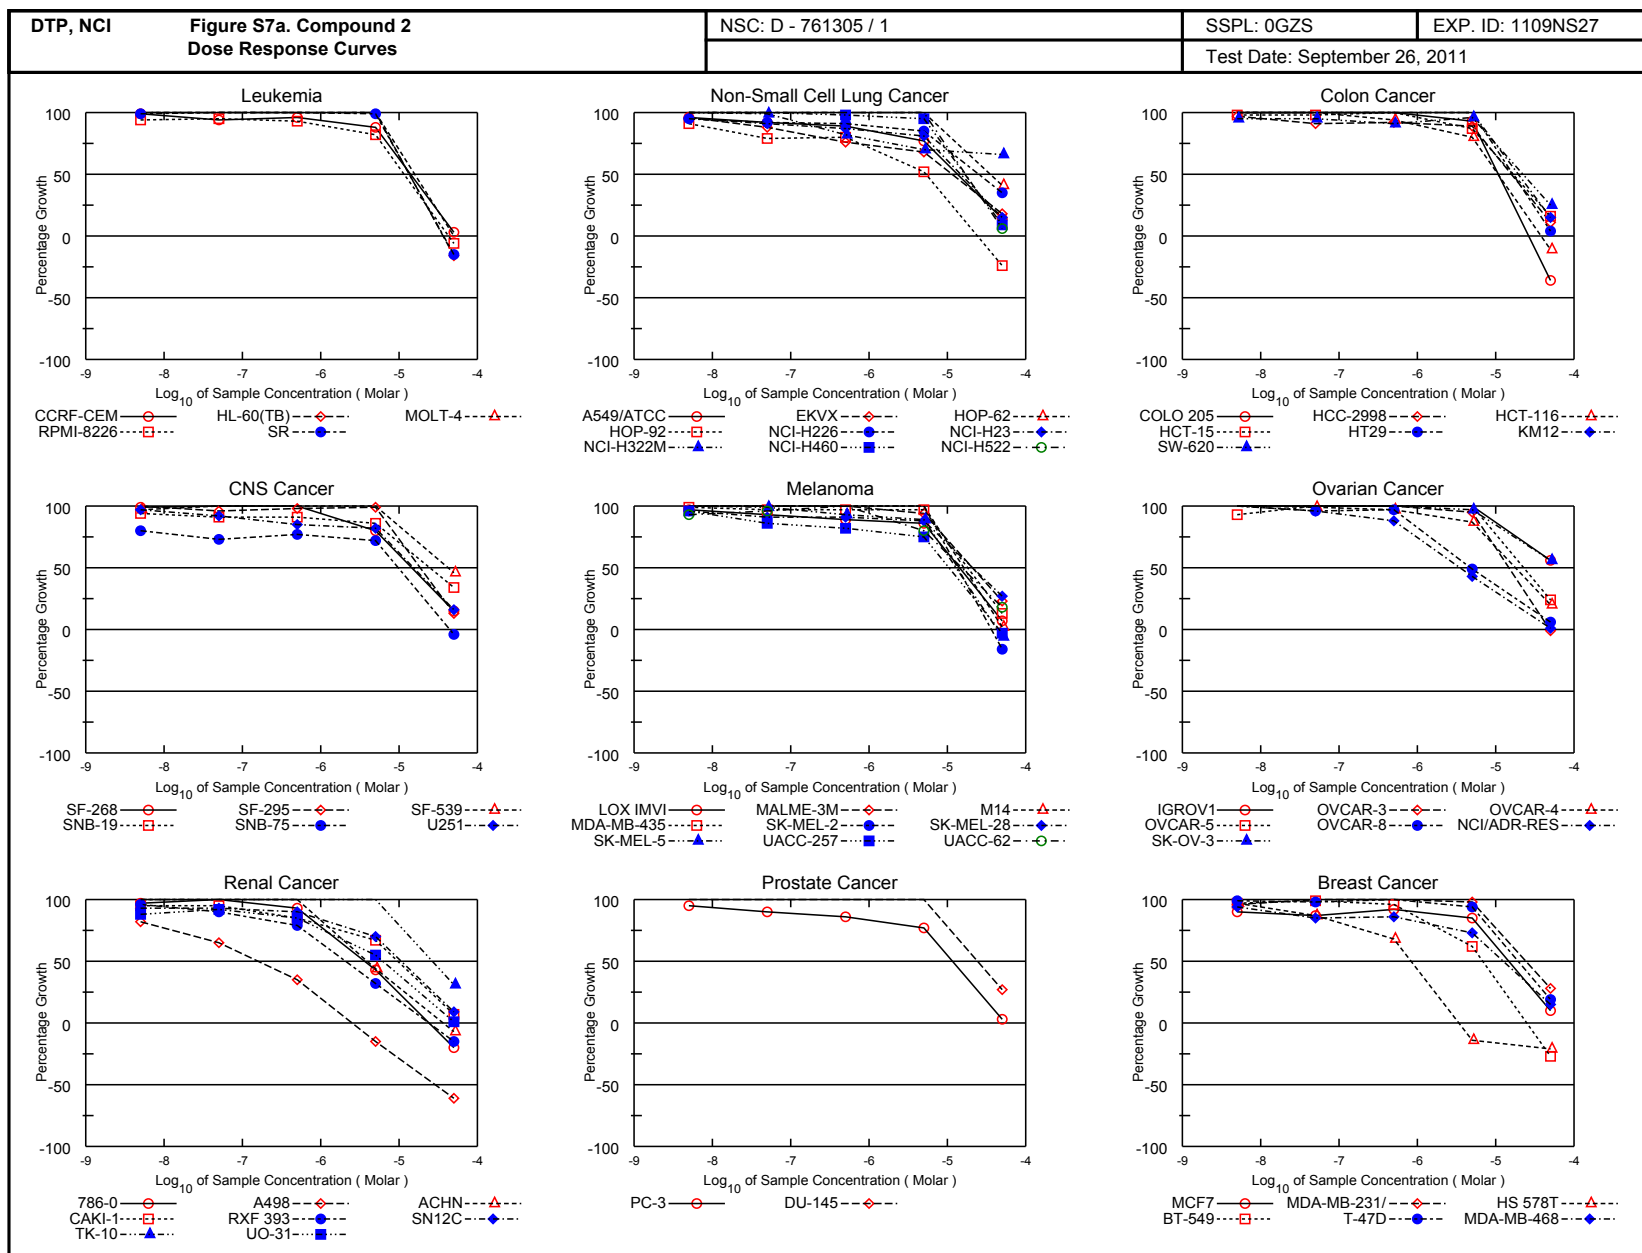

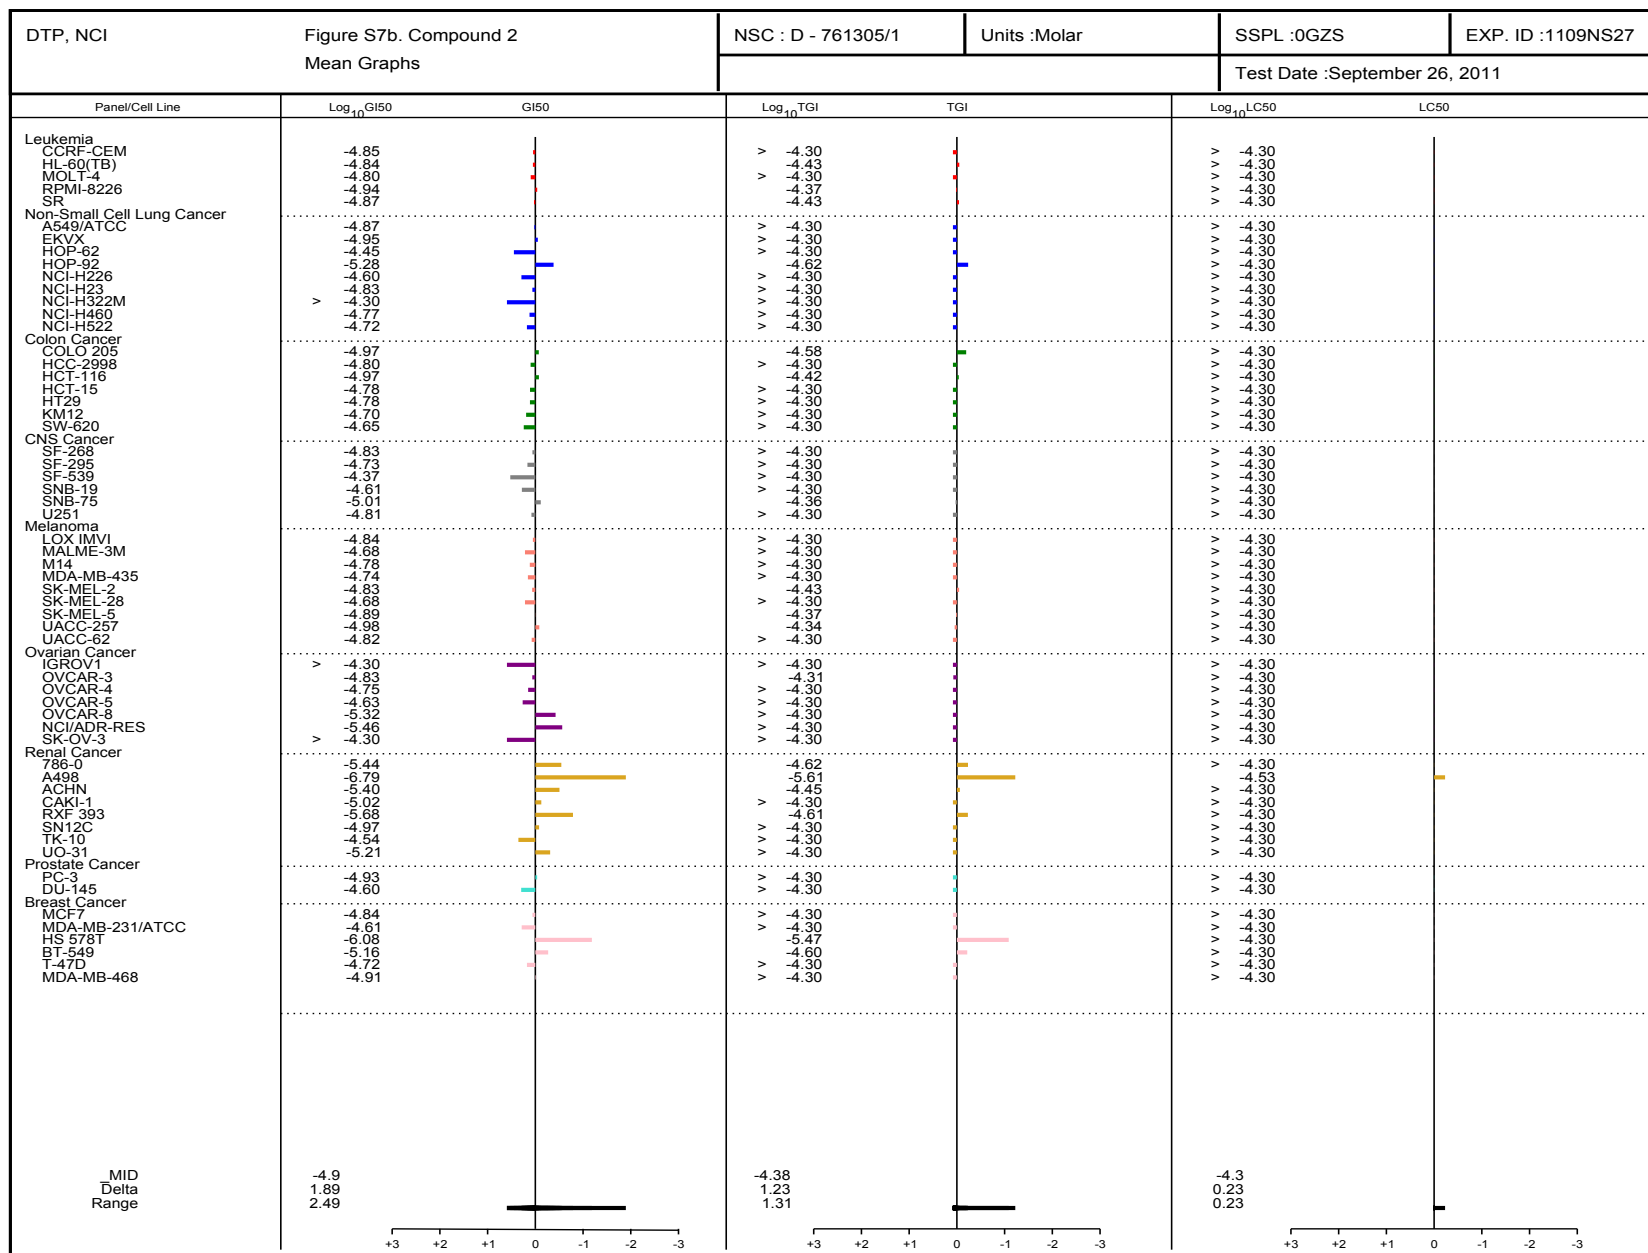

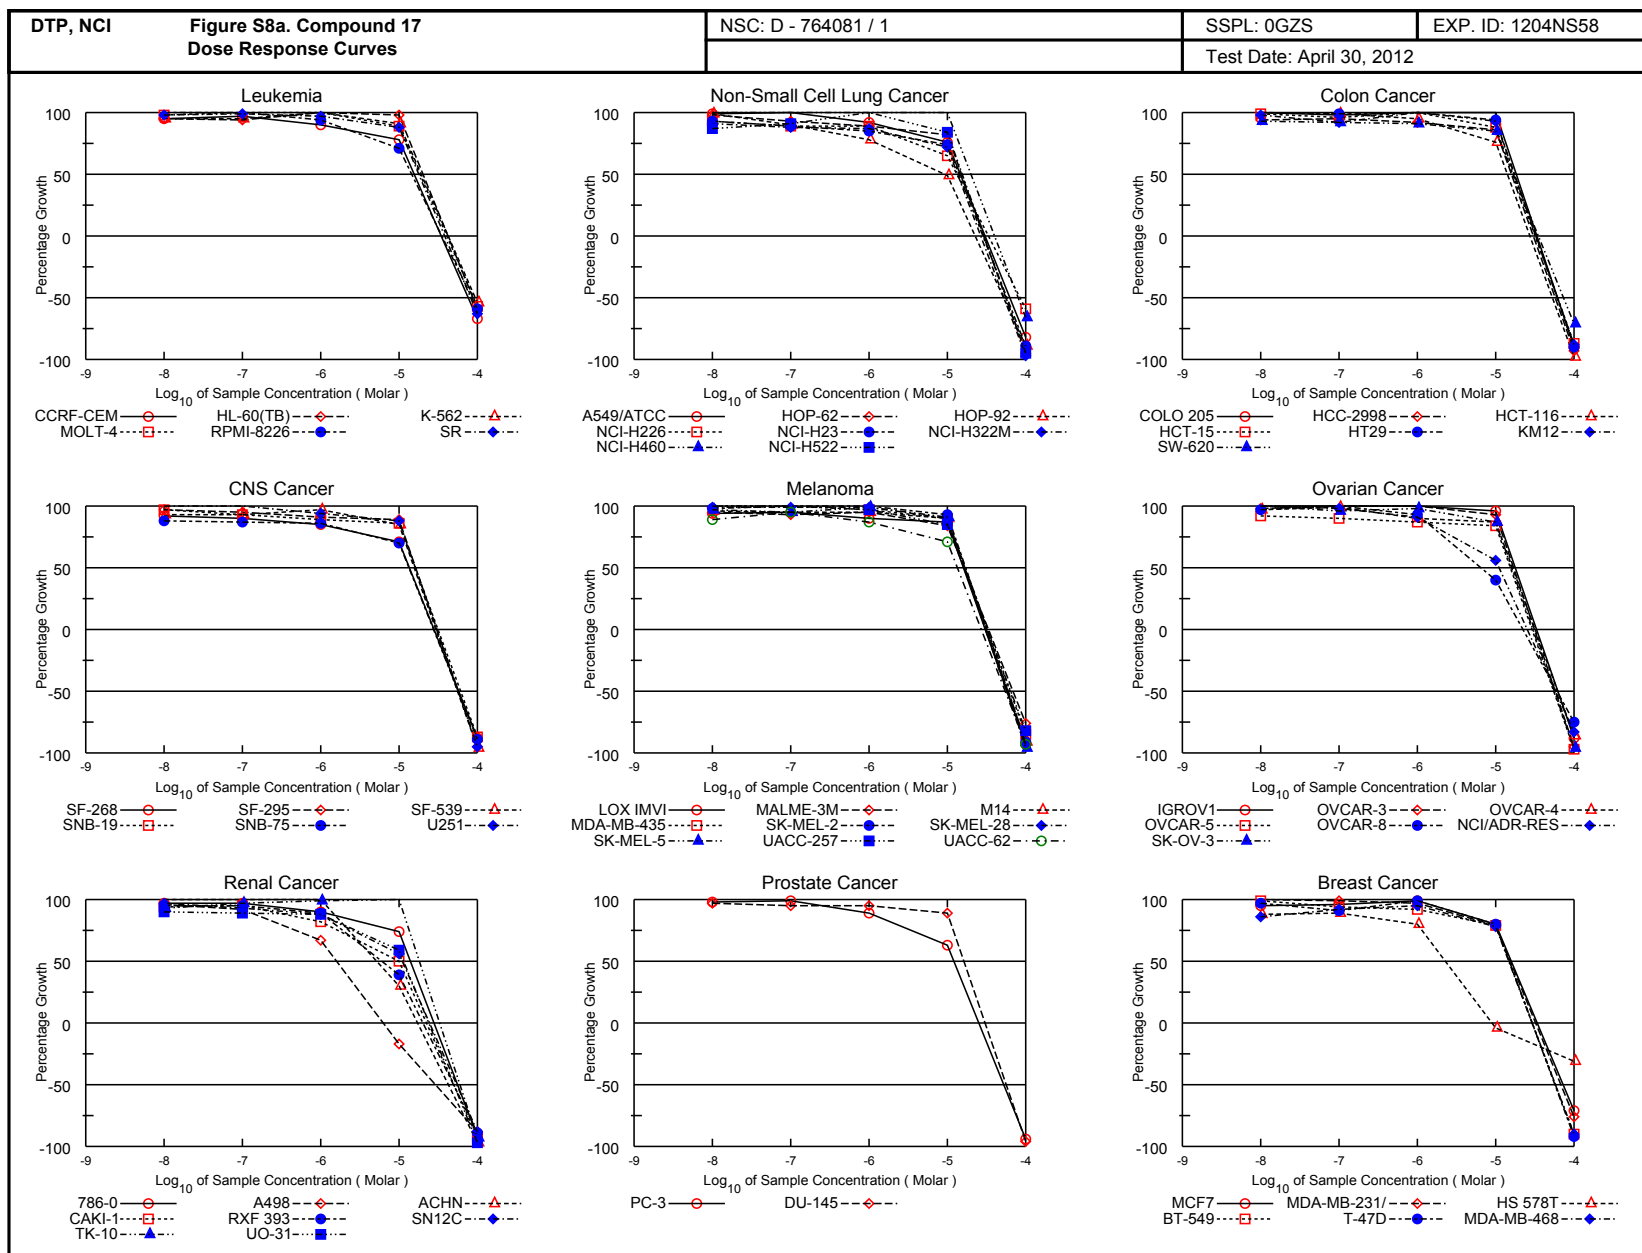



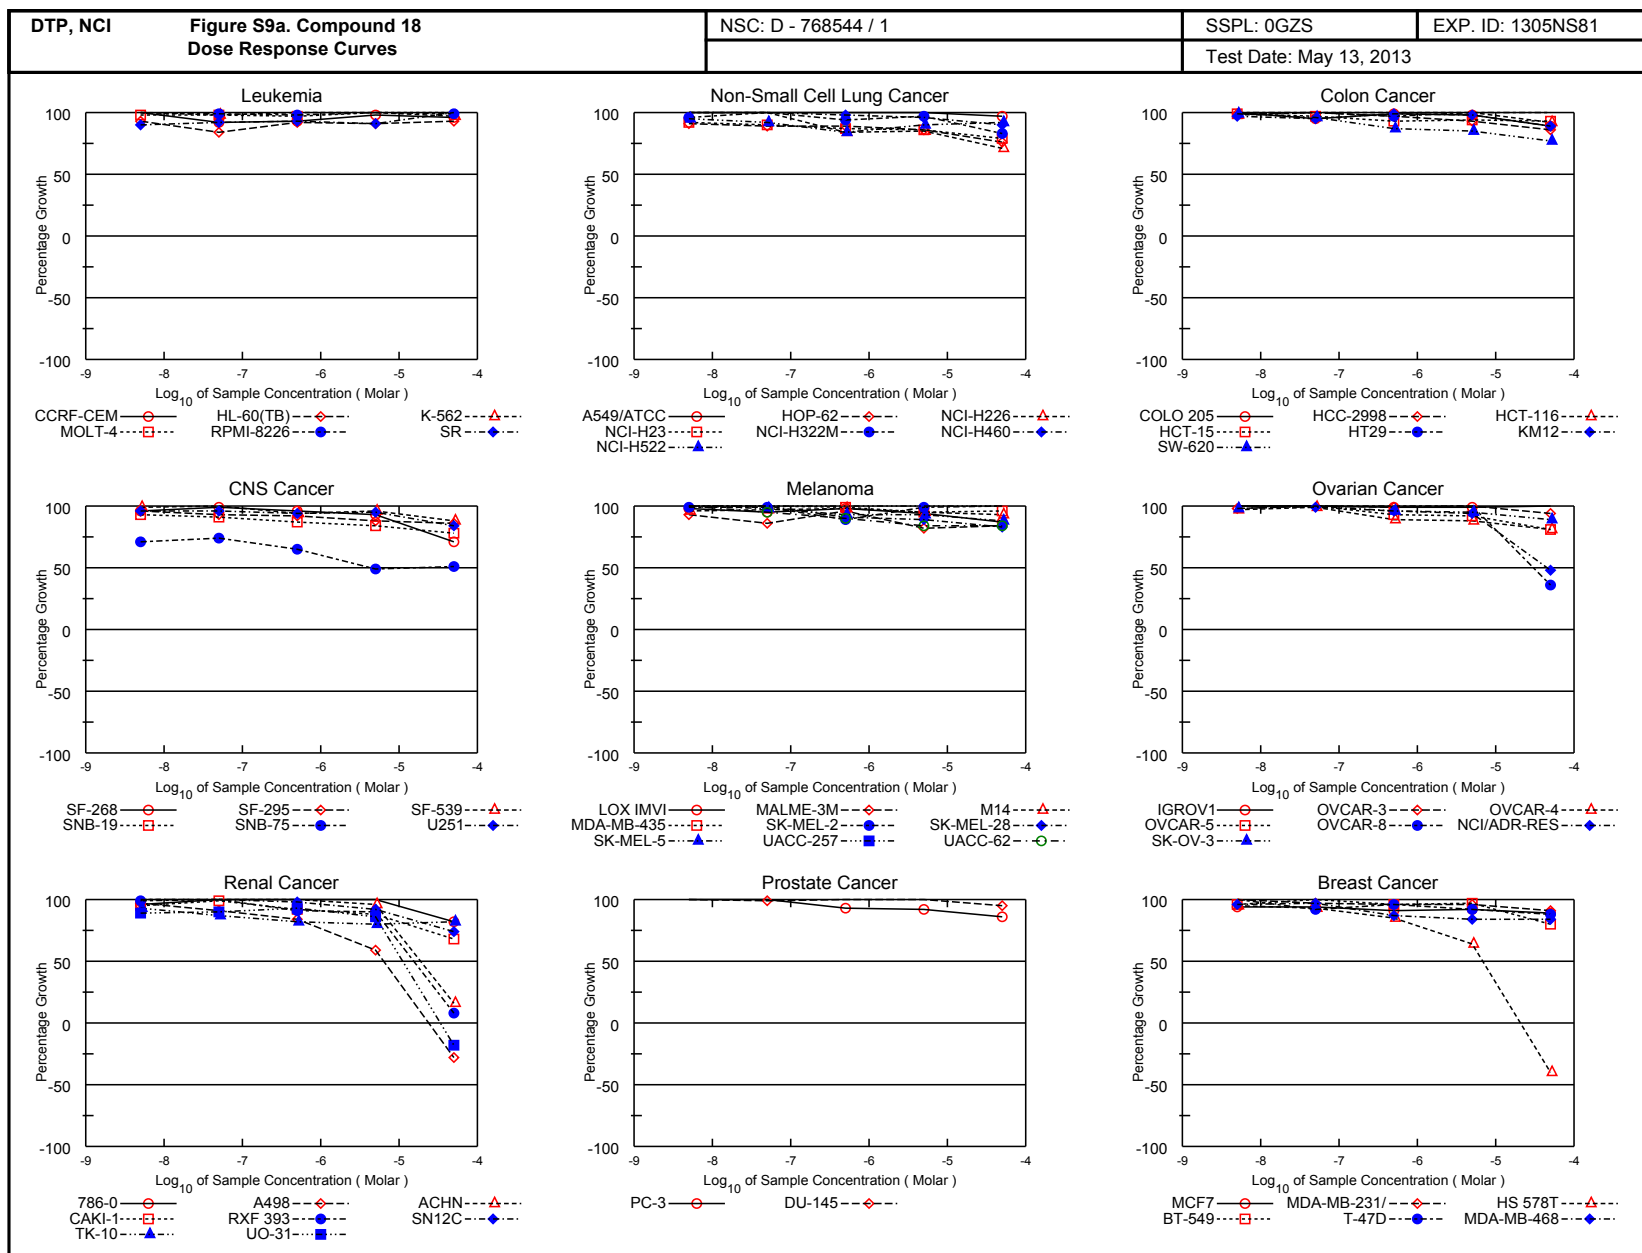

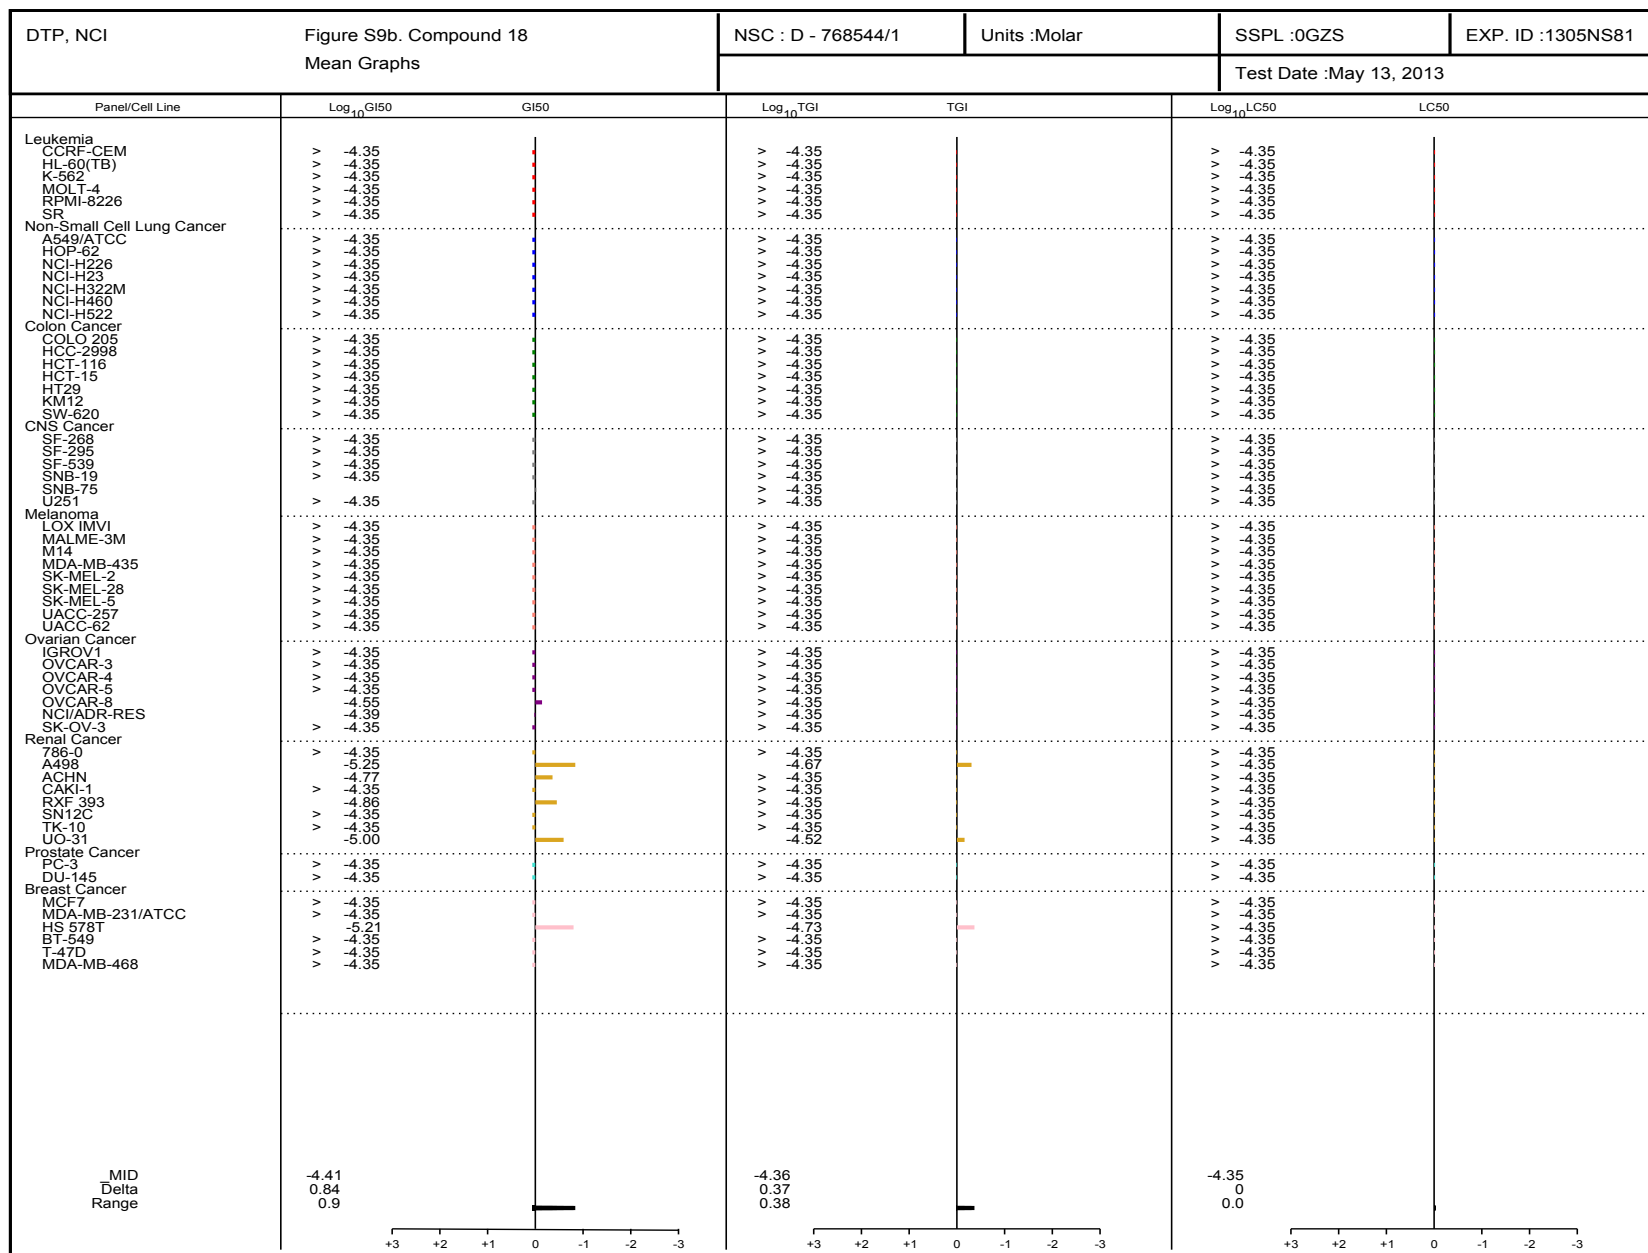

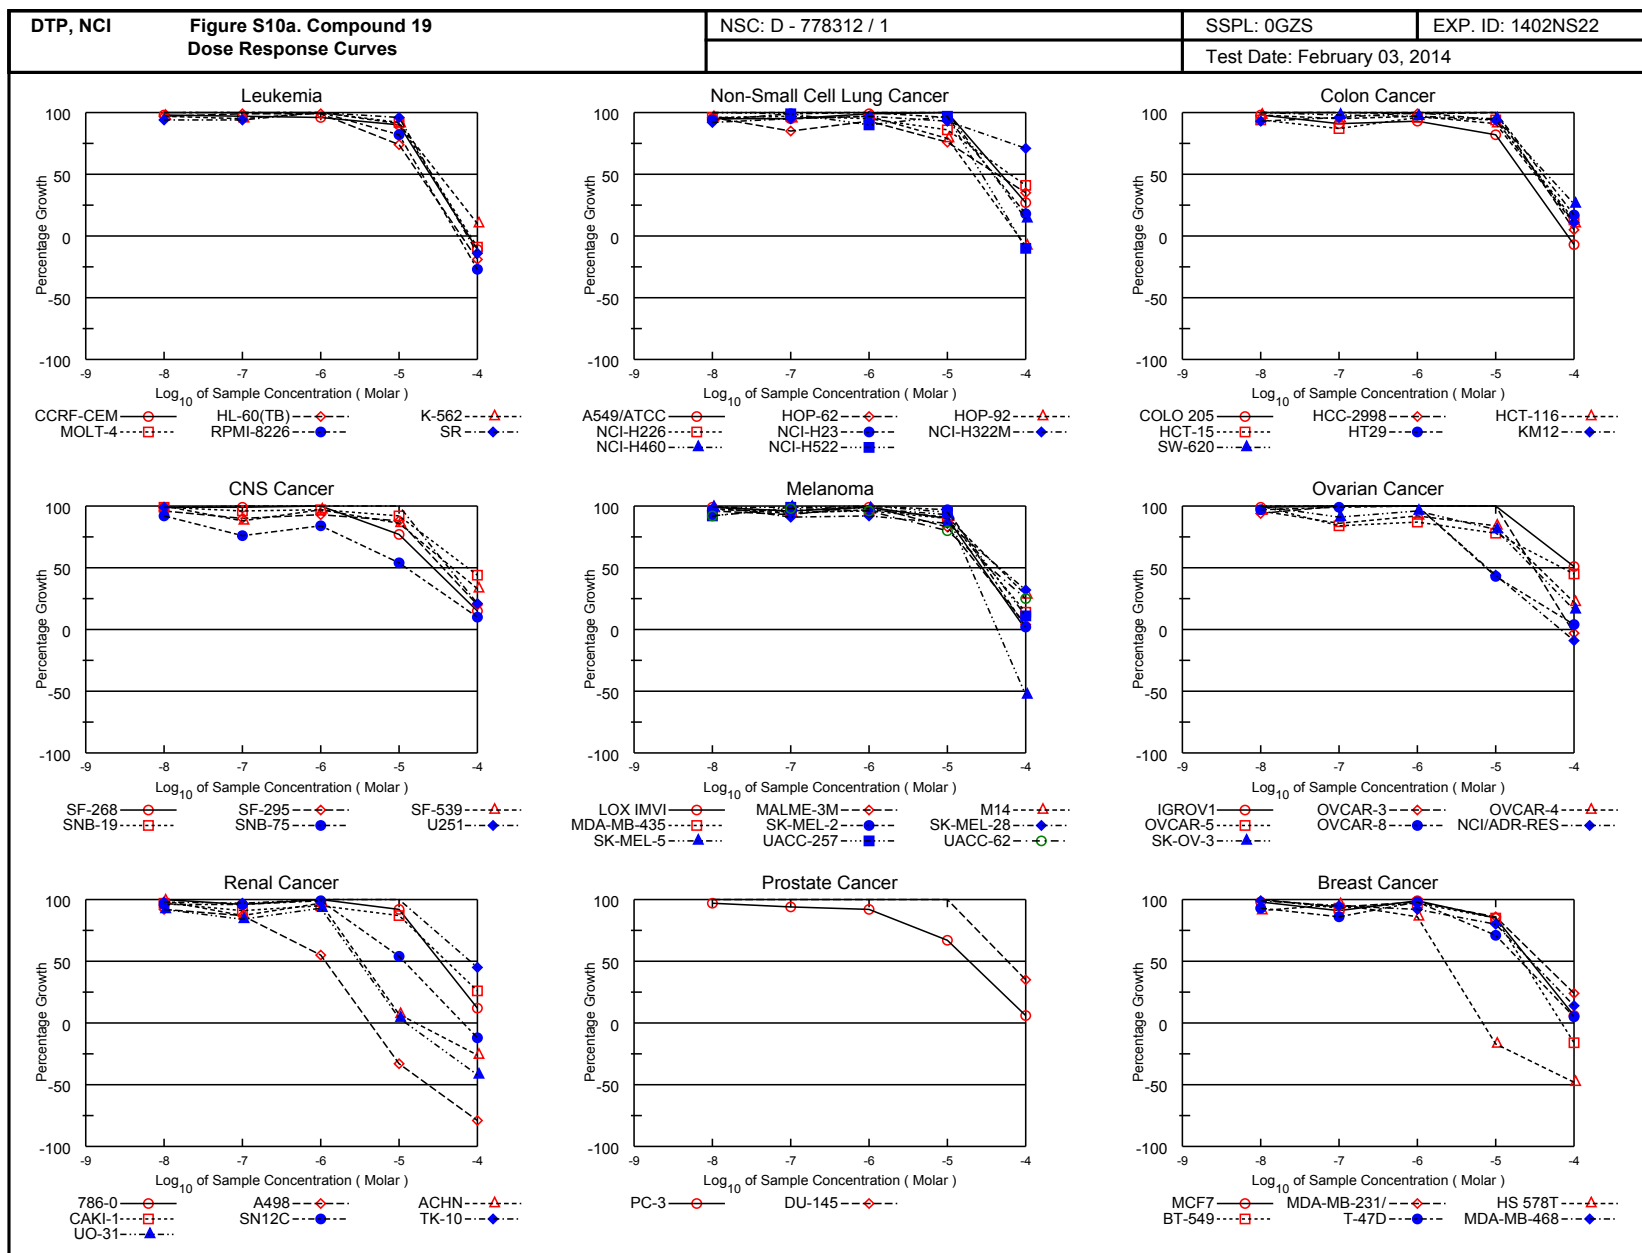

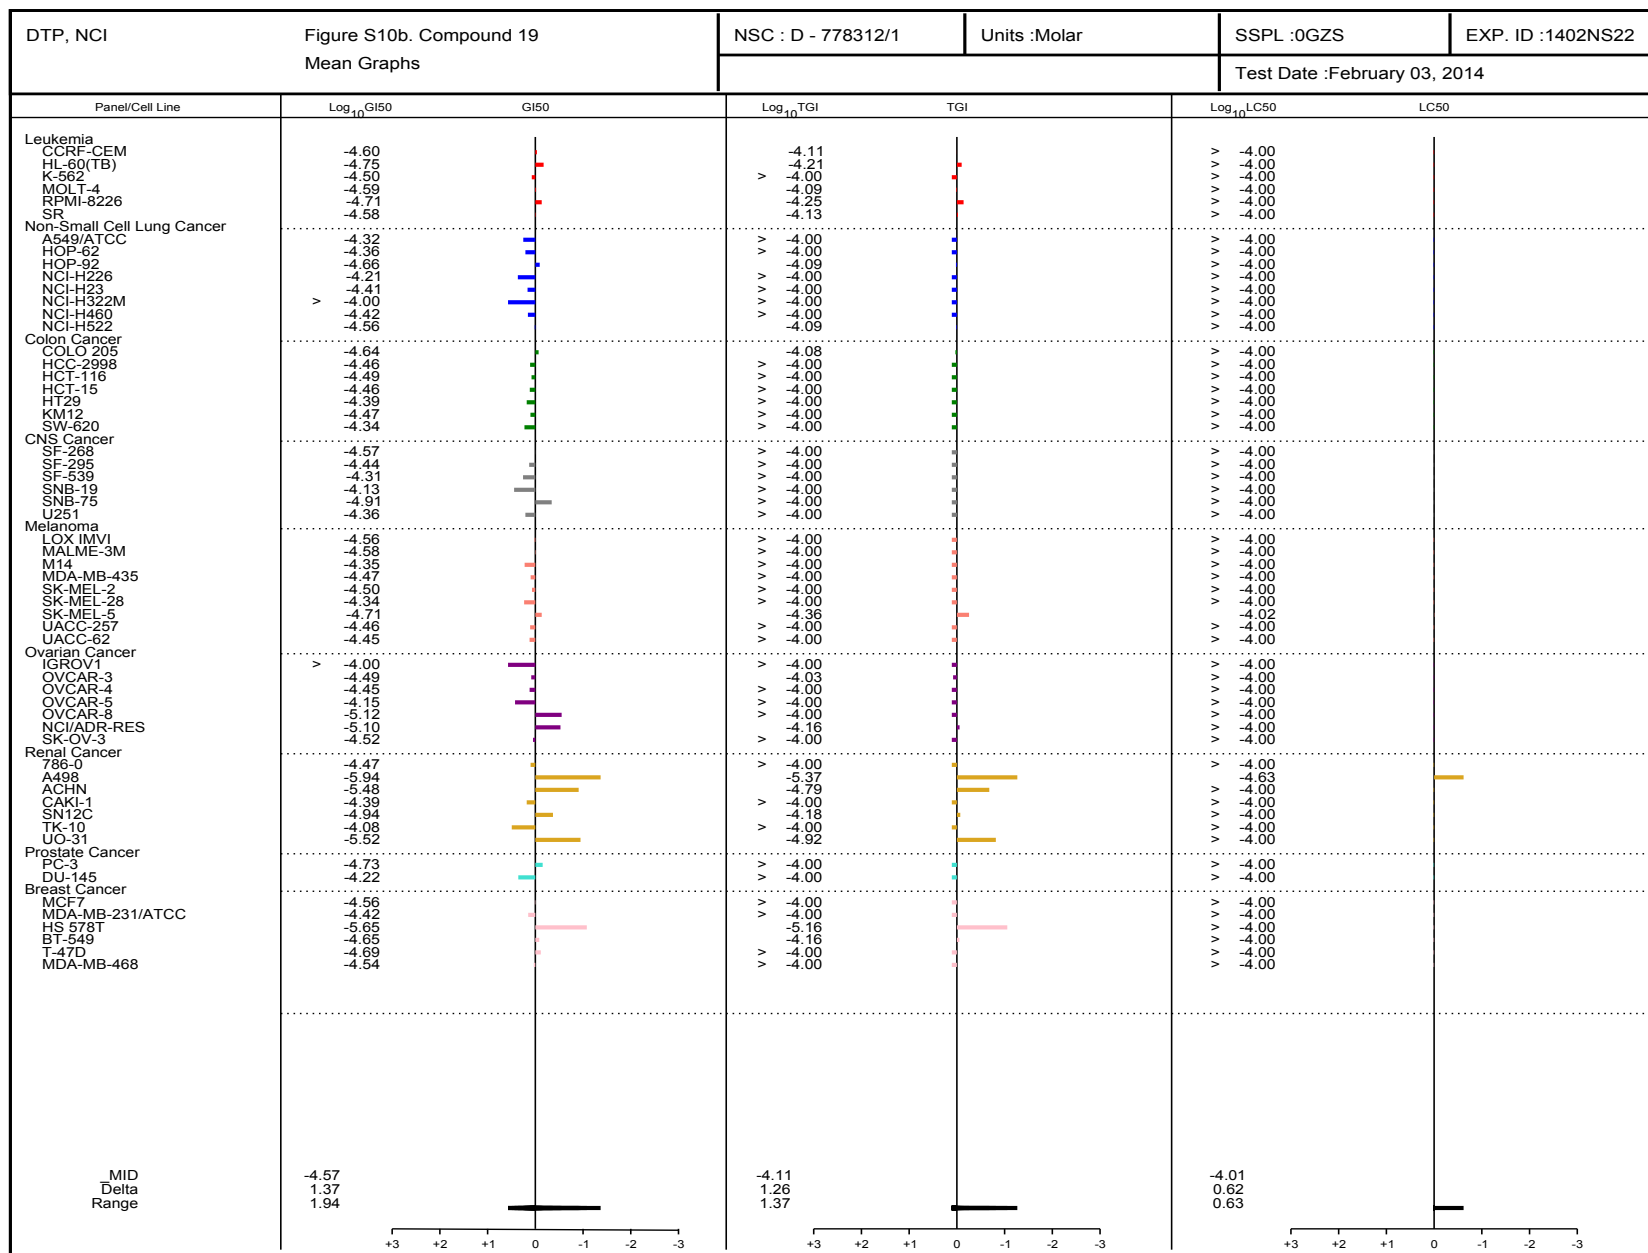

Supplement: NIHMS780852-supplement.pdf [file NIHMS780852-supplement.pdf]
